# Supplementary material
Source: publisher figshare collection journal article supplement (https://gsajournals.figshare.com/articles/dataset/_/7701509)
Supplement: Supplementary file 1 [file 1]

## Sheet: Table S4
Table S4: Several attributes of SNPs that were significantly associated with the yield and yield component traits in this study. There are 11 columns in this sheet, which are (from left to right): trait the SNP is associated with, SNP name, chromosome the SNP is positioned in, physical position of the SNP, estimate of the allelic effect from GWAS, percentage of phenotypic variation explained by t…
Trait	SNP	Chromosome	Position	Allelic Effect Estimate	R2	Major Allele	Minor Allele	maf	favorable allele	favor_major or minor?	favorable allele frequency
all_trials_avg_SdLen_cm	S01_29528910	1	29528910	0.163017	2.40074	G	A	0.0365854	G	major	0.963415
all_trials_avg_SdLen_cm	S01_425640986	1	425640986	-0.203472	0.562366	C	G	0.00554324	C	major	0.994457
all_trials_avg_SdLen_cm	S01_440284589	1	440284589	0.12822	0.307003	G	C	0.00776053	G	major	0.992239
all_trials_avg_SdLen_cm	S01_441127557	1	441127557	0.147996	0.261526	G	C	0.00443459	G	major	0.995565
all_trials_avg_SdLen_cm	S01_448040019	1	448040019	0.147562	2.26833	G	A	0.0388027	G	major	0.961197
all_trials_avg_SdLen_cm	S02_21200739	2	21200739	-0.167239	0.553949	C	T	0.00776053	C	major	0.992239
all_trials_avg_SdLen_cm	S02_86294469	2	86294469	0.0657602	2.42465	A	G	0.332594	G	minor	0.332594
all_trials_avg_SdLen_cm	S02_110750907	2	110750907	-0.071431	2.81755	C	T	0.329268	C	major	0.670732
all_trials_avg_SdLen_cm	S02_120531680	2	120531680	-0.236406	4.36523	A	T	0.0676275	A	major	0.932373
all_trials_avg_SdLen_cm	S02_132955695	2	132955695	-0.079414	0.233796	A	G	0.0144124	A	major	0.985588
all_trials_avg_SdLen_cm	S02_143430838	2	143430838	-0.168839	2.01658	C	T	0.0643016	C	major	0.935698
all_trials_avg_SdLen_cm	S02_163841443	2	163841443	0.162141	2.6956	A	G	0.094235	G	minor	0.094235
all_trials_avg_SdLen_cm	S02_280450209	2	280450209	0.203196	0.757974	G	A	0.00665188	G	major	0.993348
all_trials_avg_SdLen_cm	S02_327466245	2	327466245	0.0606046	0.0894779	C	T	0.00886918	T	minor	0.00886918
all_trials_avg_SdLen_cm	S02_403257803	2	403257803	0.0936497	0.792873	T	G	0.0831486	T	major	0.916851
all_trials_avg_SdLen_cm	S03_58073504	3	58073504	0.0194438	0.193912	G	A	0.338137	G	major	0.661863
all_trials_avg_SdLen_cm	S03_290939373	3	290939373	0.0750575	0.293574	G	A	0.0199557	G	major	0.980044
all_trials_avg_SdLen_cm	S03_337625064	3	337625064	-0.0374643	0.860482	T	G	0.431264	G	minor	0.431264
all_trials_avg_SdLen_cm	S03_354805182	3	354805182	-0.0155874	0.022017	C	A	0.0332594	A	minor	0.0332594
all_trials_avg_SdLen_cm	S03_407190205	3	407190205	0.157256	2.70751	A	G	0.104213	G	minor	0.104213
all_trials_avg_SdLen_cm	S03_431611782	3	431611782	0.0555989	0.0758203	T	A	0.00886918	T	major	0.991131
all_trials_avg_SdLen_cm	S03_477602723	3	477602723	-0.0277511	0.0405386	A	C	0.0210643	A	major	0.978936
all_trials_avg_SdLen_cm	S04_5654320	4	5654320	-0.0117837	0.0892806	G	C	0.435698	C	minor	0.435698
all_trials_avg_SdLen_cm	S04_31032972	4	31032972	0.0541671	0.10645	G	A	0.0144124	G	major	0.985588
all_trials_avg_SdLen_cm	S04_35525008	4	35525008	0.221166	2.56537	C	A	0.0210643	C	major	0.978936
all_trials_avg_SdLen_cm	S04_48117627	4	48117627	-0.0269233	0.247513	A	G	0.161863	A	major	0.838137
all_trials_avg_SdLen_cm	S04_99870528	4	99870528	-0.192983	0.451519	C	T	0.00443459	C	major	0.995565
all_trials_avg_SdLen_cm	S04_103131373	4	103131373	0.223204	2.60276	T	A	0.0210643	T	major	0.978936
all_trials_avg_SdLen_cm	S04_119394068	4	119394068	-0.204325	2.95367	A	C	0.0277162	A	major	0.972284
all_trials_avg_SdLen_cm	S04_137847829	4	137847829	0.0287672	0.0422547	T	C	0.0210643	T	major	0.978936
all_trials_avg_SdLen_cm	S04_199697392	4	199697392	-0.320333	1.32398	G	T	0.00554324	G	major	0.994457
all_trials_avg_SdLen_cm	S04_220130053	4	220130053	0.313727	2.59078	G	A	0.0121951	G	major	0.987805
all_trials_avg_SdLen_cm	S04_239757520	4	239757520	0.197356	3.90549	G	A	0.094235	G	major	0.905765
all_trials_avg_SdLen_cm	S04_261858888	4	261858888	-0.0739942	0.624793	G	A	0.103104	A	minor	0.103104
all_trials_avg_SdLen_cm	S05_57840749	5	57840749	-0.030062	0.0276041	T	C	0.0121951	C	minor	0.0121951
all_trials_avg_SdLen_cm	S05_366528709	5	366528709	0.0855116	4.30246	A	G	0.455654	G	minor	0.455654
all_trials_avg_SdLen_cm	S05_397289341	5	397289341	0.0960788	0.0551208	G	A	0.0022173	G	major	0.997783
all_trials_avg_SdLen_cm	S06_27073124	6	27073124	-0.353056	3.76435	C	T	0.0121951	C	major	0.987805
all_trials_avg_SdLen_cm	S06_30049280	6	30049280	-0.0341277	0.122191	A	C	0.101996	A	major	0.898004
all_trials_avg_SdLen_cm	S06_166357566	6	166357566	0.188758	0.477957	G	A	0.00554324	G	major	0.994457
all_trials_avg_SdLen_cm	S06_347530512	6	347530512	0.289434	2.73751	G	A	0.0121951	G	major	0.987805
all_trials_avg_SdLen_cm	S06_373070997	6	373070997	0.0120685	0.00854674	G	A	0.0221729	G	major	0.977827
all_trials_avg_SdLen_cm	S06_480699953	6	480699953	-0.170612	0.533989	A	T	0.00665188	A	major	0.993348
all_trials_avg_SdLen_cm	S06_510179340	6	510179340	0.0717258	3.00358	A	G	0.455654	G	minor	0.455654
all_trials_avg_SdLen_cm	S06_518578819	6	518578819	0.0632091	2.32367	C	G	0.422395	G	minor	0.422395
all_trials_avg_SdLen_cm	S06_568793265	6	568793265	-0.0342482	0.740308	G	A	0.424612	A	minor	0.424612
all_trials_avg_SdLen_cm	S07_12079084	7	12079084	0.0332588	0.173307	A	G	0.0654102	G	minor	0.0654102
all_trials_avg_SdLen_cm	S07_91555077	7	91555077	-0.211992	1.63521	C	T	0.0144124	C	major	0.985588
all_trials_avg_SdLen_cm	S07_103055343	7	103055343	-0.0513604	0.211014	C	G	0.0687361	C	major	0.931264
all_trials_avg_SdLen_cm	S07_156597465	7	156597465	-0.0194725	0.0098091	C	T	0.00997783	C	major	0.990022
all_trials_avg_SdLen_cm	S07_226848353	7	226848353	-0.0698238	0.411538	G	A	0.0742794	A	minor	0.0742794
all_trials_avg_SdLen_cm	S07_516499740	7	516499740	-0.012205	0.0921265	A	G	0.440133	A	major	0.559867
all_trials_avg_SdLen_cm	S08_67484386	8	67484386	0.133032	0.658944	A	G	0.0144124	G	minor	0.0144124
all_trials_avg_SdLen_cm	S08_121556108	8	121556108	0.129496	1.77273	C	T	0.0986696	T	minor	0.0986696
all_trials_avg_SdLen_cm	S08_197291732	8	197291732	-0.120745	1.26953	C	T	0.0731707	C	major	0.926829
all_trials_avg_SdLen_cm	S08_324506204	8	324506204	-0.193172	3.68325	A	G	0.0898004	A	major	0.9102
all_trials_avg_SdLen_cm	S08_425968180	8	425968180	0.0102427	0.0615399	C	G	0.371397	G	minor	0.371397
all_trials_avg_SdLen_cm	S09_61869885	9	61869885	-0.0357672	0.355436	G	C	0.117517	C	minor	0.117517
all_trials_avg_SdLen_cm	S09_315677404	9	315677404	0.0134012	0.0176977	C	A	0.0886918	C	major	0.911308
all_trials_avg_SdLen_cm	S09_385133100	9	385133100	0.0707415	1.58302	G	A	0.140798	G	major	0.859202
all_trials_avg_SdLen_cm	S09_415851589	9	415851589	-0.017989	0.0289304	C	T	0.0853659	C	major	0.914634
all_trials_avg_SdLen_cm	S10_10944243	10	10944243	0.00137779	8.24393e-05	G	A	0.0166297	G	major	0.98337
all_trials_avg_SdLen_cm	S10_62112342	10	62112342	-0.0373371	0.812856	T	C	0.365854	C	minor	0.365854
all_trials_avg_SdLen_cm	S10_120456859	10	120456859	-0.194864	2.8475	G	A	0.059867	A	minor	0.059867
all_trials_avg_SdLen_cm	S10_447491711	10	447491711	-0.00413994	0.000231692	A	G	0.00554324	A	major	0.994457
all_trials_avg_SdLen_cm	S10_459839942	10	459839942	0.116911	0.998921	G	T	0.0609756	T	minor	0.0609756
all_trials_avg_SdLen_cm	S10_463199055	10	463199055	0.0571637	0.0203992	A	C	0.0022173	C	minor	0.0022173
all_trials_avg_SdLen_cm	S11_6019252	11	6019252	-0.0625044	2.36953	G	A	0.471175	A	minor	0.471175
all_trials_avg_SdLen_cm	S11_52972239	11	52972239	-0.148384	1.37096	C	G	0.0254989	C	major	0.974501
all_trials_avg_SdLen_cm	S11_59775443	11	59775443	-0.132719	2.62705	C	T	0.0609756	C	major	0.939024
all_trials_avg_SdLen_cm	S11_161626009	11	161626009	-0.430789	2.34879	A	G	0.00554324	A	major	0.994457
all_trials_avg_SdLen_cm	S11_191637589	11	191637589	0.0573187	0.0252017	T	C	0.00332594	T	major	0.996674
all_trials_avg_SdLen_cm	S11_211702566	11	211702566	-0.0146927	0.00980873	C	A	0.0210643	A	minor	0.0210643
all_trials_avg_SdLen_cm	S11_227848416	11	227848416	0.0827118	0.0848624	G	A	0.00443459	G	major	0.995565
all_trials_avg_SdLen_cm	S11_235603452	11	235603452	-0.0611715	2.29001	G	A	0.491131	A	minor	0.491131
all_trials_avg_SdLen_cm	S11_241092955	11	241092955	-0.0423704	1.09106	T	A	0.411308	A	minor	0.411308
all_trials_avg_SdLen_cm	S12_25712846	12	25712846	0.00545662	0.0159184	C	T	0.284922	T	minor	0.284922
all_trials_avg_SdLen_cm	S12_87898328	12	87898328	-0.051864	0.238521	A	G	0.0798226	A	major	0.920177
all_trials_avg_SdLen_cm	S13_9159276	13	9159276	0.189874	0.494983	G	A	0.00554324	G	major	0.994457
all_trials_avg_SdLen_cm	S13_9595560	13	9595560	-0.0451343	0.0360674	C	T	0.00665188	C	major	0.993348
all_trials_avg_SdLen_cm	S13_17051098	13	17051098	-0.0380476	0.354109	A	G	0.109756	A	major	0.890244
all_trials_avg_SdLen_cm	S13_29748874	13	29748874	0.25211	2.73548	G	A	0.018847	G	major	0.981153
all_trials_avg_SdLen_cm	S13_51976779	13	51976779	0.00127919	0.00103785	T	A	0.488914	T	major	0.511086
all_trials_avg_SdLen_cm	S13_58962015	13	58962015	0.0347934	0.0654104	G	A	0.0210643	G	major	0.978936
all_trials_avg_SdLen_cm	S13_134782913	13	134782913	-0.366586	2.49121	C	T	0.00776053	C	major	0.992239
all_trials_avg_SdLen_cm	S13_135391210	13	135391210	-0.221745	1.47802	C	T	0.0121951	C	major	0.987805
all_trials_avg_SdLen_cm	S13_209539816	13	209539816	-0.087796	0.414237	C	G	0.0210643	C	major	0.978936
all_trials_avg_SdLen_cm	S13_222536639	13	222536639	0.277491	1.91564	G	A	0.00997783	G	major	0.990022
all_trials_avg_SdLen_cm	S13_245158348	13	245158348	0.161376	1.23828	G	C	0.018847	G	major	0.981153
all_trials_avg_SdLen_cm	S13_248290754	13	248290754	0.0998629	3.23469	A	G	0.145233	G	minor	0.145233
all_trials_avg_SdLen_cm	S13_252462690	13	252462690	-0.00978435	0.0418031	G	C	0.2051	C	minor	0.2051
all_trials_avg_SdLen_cm	S13_265039502	13	265039502	-0.0855382	0.143481	A	G	0.00776053	A	major	0.992239
all_trials_avg_SdLen_cm	S13_273891126	13	273891126	0.286862	2.3471	G	C	0.0110865	G	major	0.988914
all_trials_avg_SdLen_cm	S14_76804610	14	76804610	0.00863562	0.0351456	C	T	0.233925	T	minor	0.233925
all_trials_avg_SdLen_cm	S14_159035766	14	159035766	-0.153132	0.719361	C	T	0.0121951	C	major	0.987805
all_trials_avg_SdLen_cm	S14_224203729	14	224203729	-0.133676	0.723481	A	G	0.0155211	A	major	0.984479
all_trials_avg_SdLen_cm	S14_234445278	14	234445278	-0.0647022	2.53916	G	A	0.372506	A	minor	0.372506
all_trials_avg_SdLen_cm	S14_326710436	14	326710436	-0.0519621	0.427751	G	A	0.0620843	A	minor	0.0620843
all_trials_avg_SdLen_cm	S14_496475519	14	496475519	0.0248445	0.018476	C	A	0.0110865	C	major	0.988914
all_trials_avg_SdLen_cm	S15_349866048	15	349866048	0.0526374	0.304714	G	C	0.104213	G	major	0.895787
all_trials_avg_SdLen_cm	S15_374356928	15	374356928	0.149509	0.945711	C	T	0.0155211	T	minor	0.0155211
all_trials_avg_SdLen_cm	S15_387961489	15	387961489	-0.0691693	0.0865416	G	A	0.00665188	A	minor	0.00665188
all_trials_avg_SdLen_cm	S15_412358042	15	412358042	0.0557444	1.5903	T	G	0.282705	T	major	0.717295
all_trials_avg_SdLen_cm	S15_566727557	15	566727557	-0.229619	1.32074	A	C	0.00997783	A	major	0.990022
all_trials_avg_SdLen_cm	S15_582877307	15	582877307	0.00943605	0.0104836	T	G	0.0487805	T	major	0.95122
all_trials_avg_SdLen_cm	S15_600918584	15	600918584	0.0345561	0.593802	C	T	0.25388	T	minor	0.25388
all_trials_avg_SdLen_cm	S16_31792648	16	31792648	0.118976	0.650385	T	C	0.018847	T	major	0.981153
all_trials_avg_SdLen_cm	S16_229832414	16	229832414	-0.17305	2.35812	G	A	0.0731707	A	minor	0.0731707
all_trials_avg_SdLen_cm	S16_242132329	16	242132329	0.0126955	0.09434	C	G	0.480044	G	minor	0.480044
all_trials_avg_SdLen_cm	S16_263001852	16	263001852	0.0723192	1.13972	G	A	0.094235	G	major	0.905765
all_trials_avg_SdLen_cm	S16_296781475	16	296781475	-0.00594395	0.0034315	G	A	0.0986696	A	minor	0.0986696
all_trials_avg_SdLen_cm	S16_336657077	16	336657077	0.0619165	2.44596	T	A	0.411308	T	major	0.588692
all_trials_avg_SdLen_cm	S16_336657091	16	336657091	-0.0685131	2.3006	A	C	0.247228	A	major	0.752772
all_trials_avg_SdLen_cm	S16_399342247	16	399342247	0.0363997	0.0459736	C	T	0.0133038	T	minor	0.0133038
all_trials_avg_SdLen_cm	S17_108653775	17	108653775	0.168303	2.88679	T	C	0.0964523	T	major	0.903548
all_trials_avg_SdLen_cm	S17_108653809	17	108653809	-0.169214	2.89562	C	T	0.0953437	C	major	0.904656
all_trials_avg_SdLen_cm	S17_239233309	17	239233309	-0.136166	1.87798	C	T	0.103104	C	major	0.896896
all_trials_avg_SdLen_cm	S17_286648169	17	286648169	0.314384	2.80627	T	C	0.0110865	T	major	0.988914
all_trials_avg_SdLen_cm	S18_31933921	18	31933921	-0.158095	2.53926	C	T	0.037694	C	major	0.962306
all_trials_avg_SdLen_cm	S18_62374700	18	62374700	0.0792004	0.560367	G	A	0.0343681	G	major	0.965632
all_trials_avg_SdLen_cm	S18_75576716	18	75576716	0.2326	2.57714	T	C	0.0199557	T	major	0.980044
all_trials_avg_SdLen_cm	S18_112460873	18	112460873	-0.120114	1.06466	G	A	0.0609756	A	minor	0.0609756
all_trials_avg_SdLen_cm	S18_182594987	18	182594987	-0.0602253	0.348292	G	T	0.0842572	G	major	0.915743
all_trials_avg_SdLen_cm	S18_412960071	18	412960071	-0.059812	0.371927	A	G	0.0964523	A	major	0.903548
all_trials_avg_SdLen_cm	S18_426508862	18	426508862	-0.407005	2.72287	G	T	0.00665188	G	major	0.993348
all_trials_avg_SdLen_cm	S18_482517030	18	482517030	-0.0694229	0.357587	G	A	0.0620843	A	minor	0.0620843
all_trials_avg_SdLen_cm	S18_545444320	18	545444320	-0.0119426	0.0119446	G	A	0.0764967	A	minor	0.0764967
all_trials_avg_SdLen_cm	S19_70012848	19	70012848	0.0594811	0.279645	G	A	0.0676275	G	major	0.932373
all_trials_avg_SdLen_cm	S19_124074654	19	124074654	0.0145874	0.0952628	G	A	0.221729	G	major	0.778271
all_trials_avg_SdLen_cm	S19_543224680	19	543224680	-0.0316102	0.0479437	A	C	0.018847	A	major	0.981153
all_trials_avg_SdLen_cm	S19_551502245	19	551502245	-0.181273	0.247745	C	A	0.00332594	A	minor	0.00332594
all_trials_avg_SdLen_cm	S19_634869001	19	634869001	0.0380163	0.827611	T	C	0.333703	T	major	0.666297
all_trials_avg_SdLen_cm	S19_677800667	19	677800667	-0.0926395	1.0046	T	A	0.0964523	A	minor	0.0964523
all_trials_avg_SdLen_cm	S19_692361944	19	692361944	0.0583825	0.399517	G	T	0.0920177	T	minor	0.0920177
all_trials_avg_SdLen_cm	S19_736363601	19	736363601	0.00606278	0.0186121	C	G	0.344789	G	minor	0.344789
all_trials_avg_SdLen_cm	S20_35656076	20	35656076	-0.0375723	0.564397	G	T	0.194013	G	major	0.805987
all_trials_avg_SdLen_cm	S20_89189834	20	89189834	-0.156214	0.61324	A	G	0.00997783	A	major	0.990022
all_trials_avg_SdLen_cm	S20_148333930	20	148333930	-0.151701	2.3471	C	A	0.0909091	A	minor	0.0909091
all_trials_avg_SdLen_cm	S20_158929692	20	158929692	-0.189694	0.663747	A	G	0.00665188	A	major	0.993348
all_trials_avg_SdLen_cm	S20_339143703	20	339143703	0.146241	2.40472	G	A	0.104213	G	major	0.895787
all_trials_avg_SdLen_cm	S20_404723936	20	404723936	-0.264316	1.29118	A	T	0.00665188	A	major	0.993348
all_trials_avg_SdLen_cm	S20_405356717	20	405356717	-0.0241413	0.380597	T	A	0.464523	A	minor	0.464523
all_trials_avg_SdLen_cm	S20_488953056	20	488953056	-0.063667	0.172494	C	G	0.0166297	C	major	0.98337
all_trials_avg_SdLen_cm	S20_580880025	20	580880025	-0.11753	0.409065	A	G	0.0110865	A	major	0.988914
all_trials_avg_SdLen_cm	S20_603356555	20	603356555	-0.229445	3.64018	A	C	0.0277162	A	major	0.972284
all_trials_avg_SdLen_cm	S21_66129792	21	66129792	0.312765	2.29487	C	G	0.00886918	G	minor	0.00886918
all_trials_avg_SdLen_cm	S21_86037764	21	86037764	0.0355322	0.369639	T	C	0.13082	T	major	0.86918
all_trials_avg_SdLen_cm	S21_90650201	21	90650201	0.0743549	3.44434	T	C	0.378049	T	major	0.621951
all_trials_avg_SdLen_cm	S21_90762051	21	90762051	0.430789	2.34879	T	C	0.00554324	T	major	0.994457
all_trials_avg_SdLen_cm	S21_118538093	21	118538093	0.263298	2.43721	G	A	0.0133038	G	major	0.986696
all_trials_avg_SdLen_cm	S21_187878445	21	187878445	-0.21518	0.604595	T	A	0.00554324	A	minor	0.00554324
all_trials_avg_SdLen_cm	S21_202424506	21	202424506	-0.258822	0.908899	G	A	0.00554324	A	minor	0.00554324
all_trials_avg_SdLen_cm	S21_411630228	21	411630228	-0.483598	2.64146	C	T	0.00443459	C	major	0.995565
all_trials_avg_SdLen_cm	S21_440793454	21	440793454	-0.237165	0.339078	C	T	0.0022173	C	major	0.997783
all_trials_avg_SdWdth_cm	S01_29528910	1	29528910	-0.0158383	0.160613	G	A	0.0365854	A	minor	0.0365854
all_trials_avg_SdWdth_cm	S01_425640986	1	425640986	0.0612984	0.365533	C	G	0.00554324	G	minor	0.00554324
all_trials_avg_SdWdth_cm	S01_440284589	1	440284589	0.228082	6.88873	G	C	0.00776053	G	major	0.992239
all_trials_avg_SdWdth_cm	S01_441127557	1	441127557	0.201525	3.46142	G	C	0.00443459	G	major	0.995565
all_trials_avg_SdWdth_cm	S01_448040019	1	448040019	0.00586601	0.0257938	G	A	0.0388027	G	major	0.961197
all_trials_avg_SdWdth_cm	S02_21200739	2	21200739	-0.255669	9.2795	C	T	0.00776053	C	major	0.992239
all_trials_avg_SdWdth_cm	S02_86294469	2	86294469	-0.00811496	0.260775	A	G	0.332594	A	major	0.667406
all_trials_avg_SdWdth_cm	S02_110750907	2	110750907	0.00160401	0.0100356	C	T	0.329268	T	minor	0.329268
all_trials_avg_SdWdth_cm	S02_120531680	2	120531680	0.00290744	0.00469827	A	T	0.0676275	T	minor	0.0676275
all_trials_avg_SdWdth_cm	S02_132955695	2	132955695	-0.00133493	0.000471971	A	G	0.0144124	A	major	0.985588
all_trials_avg_SdWdth_cm	S02_143430838	2	143430838	-0.0383474	0.737598	C	T	0.0643016	C	major	0.935698
all_trials_avg_SdWdth_cm	S02_163841443	2	163841443	-0.0174782	0.222239	A	G	0.094235	A	major	0.905765
all_trials_avg_SdWdth_cm	S02_280450209	2	280450209	-0.0129107	0.0219331	G	A	0.00665188	A	minor	0.00665188
all_trials_avg_SdWdth_cm	S02_327466245	2	327466245	0.0286872	0.143602	C	T	0.00886918	T	minor	0.00886918
all_trials_avg_SdWdth_cm	S02_403257803	2	403257803	0.00947609	0.0575382	T	G	0.0831486	T	major	0.916851
all_trials_avg_SdWdth_cm	S03_58073504	3	58073504	0.0164276	0.979271	G	A	0.338137	G	major	0.661863
all_trials_avg_SdWdth_cm	S03_290939373	3	290939373	-0.0341558	0.433123	G	A	0.0199557	A	minor	0.0199557
all_trials_avg_SdWdth_cm	S03_337625064	3	337625064	-0.0102458	0.455618	T	G	0.431264	G	minor	0.431264
all_trials_avg_SdWdth_cm	S03_354805182	3	354805182	-0.0245343	0.39167	C	A	0.0332594	A	minor	0.0332594
all_trials_avg_SdWdth_cm	S03_407190205	3	407190205	-0.0308519	0.741208	A	G	0.104213	A	major	0.895787
all_trials_avg_SdWdth_cm	S03_431611782	3	431611782	-0.000183057	5.89774e-06	T	A	0.00886918	A	minor	0.00886918
all_trials_avg_SdWdth_cm	S03_477602723	3	477602723	0.0346565	0.451056	A	C	0.0210643	C	minor	0.0210643
all_trials_avg_SdWdth_cm	S04_5654320	4	5654320	-0.0122023	0.67932	G	C	0.435698	C	minor	0.435698
all_trials_avg_SdWdth_cm	S04_31032972	4	31032972	0.00983345	0.0249512	G	A	0.0144124	G	major	0.985588
all_trials_avg_SdWdth_cm	S04_35525008	4	35525008	0.00158274	0.000932744	C	A	0.0210643	C	major	0.978936
all_trials_avg_SdWdth_cm	S04_48117627	4	48117627	-0.00640573	0.0988953	A	G	0.161863	A	major	0.838137
all_trials_avg_SdWdth_cm	S04_99870528	4	99870528	-0.0274685	0.065528	C	T	0.00443459	C	major	0.995565
all_trials_avg_SdWdth_cm	S04_103131373	4	103131373	0.00824224	0.0251794	T	A	0.0210643	T	major	0.978936
all_trials_avg_SdWdth_cm	S04_119394068	4	119394068	-0.0144744	0.105589	A	C	0.0277162	A	major	0.972284
all_trials_avg_SdWdth_cm	S04_137847829	4	137847829	0.0264229	0.252185	T	C	0.0210643	T	major	0.978936
all_trials_avg_SdWdth_cm	S04_199697392	4	199697392	-0.0681653	0.425253	G	T	0.00554324	G	major	0.994457
all_trials_avg_SdWdth_cm	S04_220130053	4	220130053	0.0369021	0.253466	G	A	0.0121951	G	major	0.987805
all_trials_avg_SdWdth_cm	S04_239757520	4	239757520	0.028203	0.565516	G	A	0.094235	G	major	0.905765
all_trials_avg_SdWdth_cm	S04_261858888	4	261858888	-0.00309779	0.00783659	G	A	0.103104	A	minor	0.103104
all_trials_avg_SdWdth_cm	S05_57840749	5	57840749	0.163992	5.84349	T	C	0.0121951	T	major	0.987805
all_trials_avg_SdWdth_cm	S05_366528709	5	366528709	0.0150015	0.933757	A	G	0.455654	G	minor	0.455654
all_trials_avg_SdWdth_cm	S05_397289341	5	397289341	0.010475	0.00467601	G	A	0.0022173	G	major	0.997783
all_trials_avg_SdWdth_cm	S06_27073124	6	27073124	-0.0293312	0.184601	C	T	0.0121951	C	major	0.987805
all_trials_avg_SdWdth_cm	S06_30049280	6	30049280	-0.0152497	0.172646	A	C	0.101996	A	major	0.898004
all_trials_avg_SdWdth_cm	S06_166357566	6	166357566	0.0240033	0.0551292	G	A	0.00554324	G	major	0.994457
all_trials_avg_SdWdth_cm	S06_347530512	6	347530512	-0.0101176	0.0240885	G	A	0.0121951	A	minor	0.0121951
all_trials_avg_SdWdth_cm	S06_373070997	6	373070997	-0.0347244	0.504736	G	A	0.0221729	A	minor	0.0221729
all_trials_avg_SdWdth_cm	S06_480699953	6	480699953	-0.0293914	0.113517	A	T	0.00665188	A	major	0.993348
all_trials_avg_SdWdth_cm	S06_510179340	6	510179340	0.0116191	0.556897	A	G	0.455654	G	minor	0.455654
all_trials_avg_SdWdth_cm	S06_518578819	6	518578819	0.00752714	0.231985	C	G	0.422395	G	minor	0.422395
all_trials_avg_SdWdth_cm	S06_568793265	6	568793265	-0.02975	3.95343	G	A	0.424612	A	minor	0.424612
all_trials_avg_SdWdth_cm	S07_12079084	7	12079084	-0.0543028	3.29721	A	G	0.0654102	A	major	0.93459
all_trials_avg_SdWdth_cm	S07_91555077	7	91555077	-0.0173012	0.0776602	C	T	0.0144124	C	major	0.985588
all_trials_avg_SdWdth_cm	S07_103055343	7	103055343	0.0227664	0.294192	C	G	0.0687361	G	minor	0.0687361
all_trials_avg_SdWdth_cm	S07_156597465	7	156597465	-0.111726	2.31768	C	T	0.00997783	C	major	0.990022
all_trials_avg_SdWdth_cm	S07_226848353	7	226848353	-0.00224607	0.00302594	G	A	0.0742794	A	minor	0.0742794
all_trials_avg_SdWdth_cm	S07_516499740	7	516499740	0.0234256	2.41527	A	G	0.440133	G	minor	0.440133
all_trials_avg_SdWdth_cm	S08_67484386	8	67484386	-0.000108069	3.11018e-06	A	G	0.0144124	A	major	0.985588
all_trials_avg_SdWdth_cm	S08_121556108	8	121556108	0.00948015	0.067454	C	T	0.0986696	T	minor	0.0986696
all_trials_avg_SdWdth_cm	S08_197291732	8	197291732	0.00126135	0.000988702	C	T	0.0731707	T	minor	0.0731707
all_trials_avg_SdWdth_cm	S08_324506204	8	324506204	0.0118341	0.098172	A	G	0.0898004	G	minor	0.0898004
all_trials_avg_SdWdth_cm	S08_425968180	8	425968180	0.0237875	2.35002	C	G	0.371397	G	minor	0.371397
all_trials_avg_SdWdth_cm	S09_61869885	9	61869885	-0.0156772	0.486124	G	C	0.117517	C	minor	0.117517
all_trials_avg_SdWdth_cm	S09_315677404	9	315677404	0.00412297	0.0118931	C	A	0.0886918	C	major	0.911308
all_trials_avg_SdWdth_cm	S09_385133100	9	385133100	0.0342956	2.63906	G	A	0.140798	G	major	0.859202
all_trials_avg_SdWdth_cm	S09_415851589	9	415851589	0.0233017	0.345125	C	T	0.0853659	T	minor	0.0853659
all_trials_avg_SdWdth_cm	S10_10944243	10	10944243	0.111556	3.87027	G	A	0.0166297	G	major	0.98337
all_trials_avg_SdWdth_cm	S10_62112342	10	62112342	-0.00671152	0.186085	T	C	0.365854	C	minor	0.365854
all_trials_avg_SdWdth_cm	S10_120456859	10	120456859	-0.0227269	0.276865	G	A	0.059867	A	minor	0.059867
all_trials_avg_SdWdth_cm	S10_447491711	10	447491711	0.0184099	0.0327344	A	G	0.00554324	G	minor	0.00554324
all_trials_avg_SdWdth_cm	S10_459839942	10	459839942	-0.0297053	0.459016	G	T	0.0609756	G	major	0.939024
all_trials_avg_SdWdth_cm	S10_463199055	10	463199055	-0.303104	4.11775	A	C	0.0022173	A	major	0.997783
all_trials_avg_SdWdth_cm	S11_6019252	11	6019252	0.00144704	0.00891846	G	A	0.471175	G	major	0.528825
all_trials_avg_SdWdth_cm	S11_52972239	11	52972239	-0.0263687	0.307184	C	G	0.0254989	C	major	0.974501
all_trials_avg_SdWdth_cm	S11_59775443	11	59775443	-0.0181498	0.349524	C	T	0.0609756	C	major	0.939024
all_trials_avg_SdWdth_cm	S11_161626009	11	161626009	-0.0744644	0.496286	A	G	0.00554324	A	major	0.994457
all_trials_avg_SdWdth_cm	S11_191637589	11	191637589	0.239306	3.15228	T	C	0.00332594	T	major	0.996674
all_trials_avg_SdWdth_cm	S11_211702566	11	211702566	-0.0218787	0.155845	C	A	0.0210643	A	minor	0.0210643
all_trials_avg_SdWdth_cm	S11_227848416	11	227848416	0.159899	2.27851	G	A	0.00443459	G	major	0.995565
all_trials_avg_SdWdth_cm	S11_235603452	11	235603452	0.00193889	0.0161639	G	A	0.491131	G	major	0.508869
all_trials_avg_SdWdth_cm	S11_241092955	11	241092955	-0.00387597	0.0644135	T	A	0.411308	A	minor	0.411308
all_trials_avg_SdWdth_cm	S12_25712846	12	25712846	-0.0107318	0.437565	C	T	0.284922	C	major	0.715078
all_trials_avg_SdWdth_cm	S12_87898328	12	87898328	-0.00254118	0.00405869	A	G	0.0798226	A	major	0.920177
all_trials_avg_SdWdth_cm	S13_9159276	13	9159276	0.331654	10.8217	G	A	0.00554324	G	major	0.994457
all_trials_avg_SdWdth_cm	S13_9595560	13	9595560	-0.138305	2.41133	C	T	0.00665188	C	major	0.993348
all_trials_avg_SdWdth_cm	S13_17051098	13	17051098	-0.0261708	1.182	A	G	0.109756	A	major	0.890244
all_trials_avg_SdWdth_cm	S13_29748874	13	29748874	0.0306875	0.286894	G	A	0.018847	G	major	0.981153
all_trials_avg_SdWdth_cm	S13_51976779	13	51976779	-0.0317505	4.5394	T	A	0.488914	A	minor	0.488914
all_trials_avg_SdWdth_cm	S13_58962015	13	58962015	-0.00351091	0.00474899	G	A	0.0210643	A	minor	0.0210643
all_trials_avg_SdWdth_cm	S13_134782913	13	134782913	-0.0723732	0.68819	C	T	0.00776053	C	major	0.992239
all_trials_avg_SdWdth_cm	S13_135391210	13	135391210	-0.0553135	0.652171	C	T	0.0121951	C	major	0.987805
all_trials_avg_SdWdth_cm	S13_209539816	13	209539816	-0.0123236	0.0581053	C	G	0.0210643	C	major	0.978936
all_trials_avg_SdWdth_cm	S13_222536639	13	222536639	0.0452284	0.361829	G	A	0.00997783	G	major	0.990022
all_trials_avg_SdWdth_cm	S13_245158348	13	245158348	0.0408858	0.566973	G	C	0.018847	G	major	0.981153
all_trials_avg_SdWdth_cm	S13_248290754	13	248290754	-0.00718432	0.118716	A	G	0.145233	A	major	0.854767
all_trials_avg_SdWdth_cm	S13_252462690	13	252462690	-0.0118867	0.440534	G	C	0.2051	C	minor	0.2051
all_trials_avg_SdWdth_cm	S13_265039502	13	265039502	0.02551	0.0911082	A	G	0.00776053	G	minor	0.00776053
all_trials_avg_SdWdth_cm	S13_273891126	13	273891126	0.0101117	0.020784	G	C	0.0110865	G	major	0.988914
all_trials_avg_SdWdth_cm	S14_76804610	14	76804610	0.00149592	0.00750117	C	T	0.233925	T	minor	0.233925
all_trials_avg_SdWdth_cm	S14_159035766	14	159035766	-0.108497	2.57749	C	T	0.0121951	C	major	0.987805
all_trials_avg_SdWdth_cm	S14_224203729	14	224203729	0.00683167	0.0134872	A	G	0.0155211	G	minor	0.0155211
all_trials_avg_SdWdth_cm	S14_234445278	14	234445278	-0.0129626	0.721965	G	A	0.372506	A	minor	0.372506
all_trials_avg_SdWdth_cm	S14_326710436	14	326710436	-0.0258972	0.758873	G	A	0.0620843	A	minor	0.0620843
all_trials_avg_SdWdth_cm	S14_496475519	14	496475519	0.13973	4.17752	C	A	0.0110865	C	major	0.988914
all_trials_avg_SdWdth_cm	S15_349866048	15	349866048	-0.0155691	0.189439	G	C	0.104213	C	minor	0.104213
all_trials_avg_SdWdth_cm	S15_374356928	15	374356928	-0.100897	3.08541	C	T	0.0155211	C	major	0.984479
all_trials_avg_SdWdth_cm	S15_387961489	15	387961489	0.216608	6.06255	G	A	0.00665188	G	major	0.993348
all_trials_avg_SdWdth_cm	S15_412358042	15	412358042	0.0155043	0.86886	T	G	0.282705	T	major	0.717295
all_trials_avg_SdWdth_cm	S15_566727557	15	566727557	-0.0355673	0.226312	A	C	0.00997783	A	major	0.990022
all_trials_avg_SdWdth_cm	S15_582877307	15	582877307	0.076158	4.86845	T	G	0.0487805	T	major	0.95122
all_trials_avg_SdWdth_cm	S15_600918584	15	600918584	-0.0153253	0.830019	C	T	0.25388	C	major	0.74612
all_trials_avg_SdWdth_cm	S16_31792648	16	31792648	0.0347042	0.394948	T	C	0.018847	T	major	0.981153
all_trials_avg_SdWdth_cm	S16_229832414	16	229832414	-0.00271549	0.00413002	G	A	0.0731707	A	minor	0.0731707
all_trials_avg_SdWdth_cm	S16_242132329	16	242132329	-0.00013255	7.18366e-05	C	G	0.480044	C	major	0.519956
all_trials_avg_SdWdth_cm	S16_263001852	16	263001852	0.0366	2.0778	G	A	0.094235	G	major	0.905765
all_trials_avg_SdWdth_cm	S16_296781475	16	296781475	-0.00726855	0.0360072	G	A	0.0986696	A	minor	0.0986696
all_trials_avg_SdWdth_cm	S16_336657077	16	336657077	0.00770525	0.269491	T	A	0.411308	T	major	0.588692
all_trials_avg_SdWdth_cm	S16_336657091	16	336657091	0.00360171	0.0451531	A	C	0.247228	C	minor	0.247228
all_trials_avg_SdWdth_cm	S16_399342247	16	399342247	-0.110474	3.0096	C	T	0.0133038	C	major	0.986696
all_trials_avg_SdWdth_cm	S17_108653775	17	108653775	0.0220707	0.351408	T	C	0.0964523	T	major	0.903548
all_trials_avg_SdWdth_cm	S17_108653809	17	108653809	-0.00992988	0.0705784	C	T	0.0953437	C	major	0.904656
all_trials_avg_SdWdth_cm	S17_239233309	17	239233309	-0.0233179	0.388407	C	T	0.103104	C	major	0.896896
all_trials_avg_SdWdth_cm	S17_286648169	17	286648169	0.0139831	0.0394894	T	C	0.0110865	T	major	0.988914
all_trials_avg_SdWdth_cm	S18_31933921	18	31933921	0.00657295	0.0315435	C	T	0.037694	T	minor	0.037694
all_trials_avg_SdWdth_cm	S18_62374700	18	62374700	0.0175106	0.195478	G	A	0.0343681	G	major	0.965632
all_trials_avg_SdWdth_cm	S18_75576716	18	75576716	0.0377312	0.480254	T	C	0.0199557	T	major	0.980044
all_trials_avg_SdWdth_cm	S18_112460873	18	112460873	0.0124341	0.0812703	G	A	0.0609756	G	major	0.939024
all_trials_avg_SdWdth_cm	S18_182594987	18	182594987	-0.022774	0.354464	G	T	0.0842572	G	major	0.915743
all_trials_avg_SdWdth_cm	S18_412960071	18	412960071	-0.048594	1.73941	A	G	0.0964523	A	major	0.903548
all_trials_avg_SdWdth_cm	S18_426508862	18	426508862	-0.0493597	0.282737	G	T	0.00665188	G	major	0.993348
all_trials_avg_SdWdth_cm	S18_482517030	18	482517030	-0.0121494	0.0776871	G	A	0.0620843	A	minor	0.0620843
all_trials_avg_SdWdth_cm	S18_545444320	18	545444320	-0.0064523	0.0247514	G	A	0.0764967	A	minor	0.0764967
all_trials_avg_SdWdth_cm	S19_70012848	19	70012848	-0.0229584	0.296029	G	A	0.0676275	A	minor	0.0676275
all_trials_avg_SdWdth_cm	S19_124074654	19	124074654	0.00828959	0.218088	G	A	0.221729	G	major	0.778271
all_trials_avg_SdWdth_cm	S19_543224680	19	543224680	0.021332	0.155969	A	C	0.018847	C	minor	0.018847
all_trials_avg_SdWdth_cm	S19_551502245	19	551502245	0.203974	2.24497	C	A	0.00332594	C	major	0.996674
all_trials_avg_SdWdth_cm	S19_634869001	19	634869001	0.00799461	0.258991	T	C	0.333703	T	major	0.666297
all_trials_avg_SdWdth_cm	S19_677800667	19	677800667	0.0250824	0.523031	T	A	0.0964523	T	major	0.903548
all_trials_avg_SdWdth_cm	S19_692361944	19	692361944	0.0528292	2.32963	G	T	0.0920177	T	minor	0.0920177
all_trials_avg_SdWdth_cm	S19_736363601	19	736363601	-0.00405872	0.0595849	C	G	0.344789	C	major	0.655211
all_trials_avg_SdWdth_cm	S20_35656076	20	35656076	-0.00377167	0.0403269	G	T	0.194013	G	major	0.805987
all_trials_avg_SdWdth_cm	S20_89189834	20	89189834	-0.179319	5.77037	A	G	0.00997783	A	major	0.990022
all_trials_avg_SdWdth_cm	S20_148333930	20	148333930	0.0128093	0.119353	C	A	0.0909091	C	major	0.909091
all_trials_avg_SdWdth_cm	S20_158929692	20	158929692	-0.192627	4.90892	A	G	0.00665188	A	major	0.993348
all_trials_avg_SdWdth_cm	S20_339143703	20	339143703	-0.00716772	0.0410895	G	A	0.104213	A	minor	0.104213
all_trials_avg_SdWdth_cm	S20_404723936	20	404723936	-0.241401	7.72266	A	T	0.00665188	A	major	0.993348
all_trials_avg_SdWdth_cm	S20_405356717	20	405356717	0.00431435	0.0865024	T	A	0.464523	T	major	0.535477
all_trials_avg_SdWdth_cm	S20_488953056	20	488953056	0.00258992	0.00203627	C	G	0.0166297	G	minor	0.0166297
all_trials_avg_SdWdth_cm	S20_580880025	20	580880025	0.049571	0.520591	A	G	0.0110865	G	minor	0.0110865
all_trials_avg_SdWdth_cm	S20_603356555	20	603356555	-0.0230307	0.260793	A	C	0.0277162	A	major	0.972284
all_trials_avg_SdWdth_cm	S21_66129792	21	66129792	0.0701753	0.826717	C	G	0.00886918	G	minor	0.00886918
all_trials_avg_SdWdth_cm	S21_86037764	21	86037764	0.0185353	0.712504	T	C	0.13082	T	major	0.86918
all_trials_avg_SdWdth_cm	S21_90650201	21	90650201	0.00591627	0.154929	T	C	0.378049	T	major	0.621951
all_trials_avg_SdWdth_cm	S21_90762051	21	90762051	0.0744644	0.496286	T	C	0.00554324	T	major	0.994457
all_trials_avg_SdWdth_cm	S21_118538093	21	118538093	-0.00879311	0.0193455	G	A	0.0133038	A	minor	0.0133038
all_trials_avg_SdWdth_cm	S21_187878445	21	187878445	0.165207	2.53219	T	A	0.00554324	T	major	0.994457
all_trials_avg_SdWdth_cm	S21_202424506	21	202424506	-0.186242	3.36573	G	A	0.00554324	A	minor	0.00554324
all_trials_avg_SdWdth_cm	S21_411630228	21	411630228	-0.0859389	0.591021	C	T	0.00443459	C	major	0.995565
all_trials_avg_SdWdth_cm	S21_440793454	21	440793454	0.0396068	0.067471	C	T	0.0022173	T	minor	0.0022173
all_trials_avg_SpkLen_cm	S01_29528910	1	29528910	-0.661151	0.885288	G	A	0.0365854	A	minor	0.0365854
all_trials_avg_SpkLen_cm	S01_425640986	1	425640986	1.74714	0.877912	C	G	0.00554324	G	minor	0.00554324
all_trials_avg_SpkLen_cm	S01_440284589	1	440284589	-0.283605	0.0334241	G	C	0.00776053	C	minor	0.00776053
all_trials_avg_SpkLen_cm	S01_441127557	1	441127557	0.251256	0.0161657	G	C	0.00443459	G	major	0.995565
all_trials_avg_SpkLen_cm	S01_448040019	1	448040019	0.1646	0.0582113	G	A	0.0388027	G	major	0.961197
all_trials_avg_SpkLen_cm	S02_21200739	2	21200739	-0.772574	0.249307	C	T	0.00776053	C	major	0.992239
all_trials_avg_SpkLen_cm	S02_86294469	2	86294469	-0.0715814	0.0665125	A	G	0.332594	A	major	0.667406
all_trials_avg_SpkLen_cm	S02_110750907	2	110750907	-0.177123	0.397434	C	T	0.329268	C	major	0.670732
all_trials_avg_SpkLen_cm	S02_120531680	2	120531680	0.119802	0.024718	A	T	0.0676275	T	minor	0.0676275
all_trials_avg_SpkLen_cm	S02_132955695	2	132955695	0.441578	0.155409	A	G	0.0144124	G	minor	0.0144124
all_trials_avg_SpkLen_cm	S02_143430838	2	143430838	-0.207461	0.0675092	C	T	0.0643016	C	major	0.935698
all_trials_avg_SpkLen_cm	S02_163841443	2	163841443	0.740512	1.26048	A	G	0.094235	G	minor	0.094235
all_trials_avg_SpkLen_cm	S02_280450209	2	280450209	0.347187	0.0464817	G	A	0.00665188	G	major	0.993348
all_trials_avg_SpkLen_cm	S02_327466245	2	327466245	2.18528	2.45454	C	T	0.00886918	T	minor	0.00886918
all_trials_avg_SpkLen_cm	S02_403257803	2	403257803	0.559294	0.63369	T	G	0.0831486	T	major	0.916851
all_trials_avg_SpkLen_cm	S03_58073504	3	58073504	0.0652696	0.0496326	G	A	0.338137	G	major	0.661863
all_trials_avg_SpkLen_cm	S03_290939373	3	290939373	-0.539326	0.330241	G	A	0.0199557	A	minor	0.0199557
all_trials_avg_SpkLen_cm	S03_337625064	3	337625064	-0.152152	0.319124	T	G	0.431264	G	minor	0.431264
all_trials_avg_SpkLen_cm	S03_354805182	3	354805182	-0.547038	0.562709	C	A	0.0332594	A	minor	0.0332594
all_trials_avg_SpkLen_cm	S03_407190205	3	407190205	0.232282	0.130917	A	G	0.104213	G	minor	0.104213
all_trials_avg_SpkLen_cm	S03_431611782	3	431611782	2.38243	2.89908	T	A	0.00886918	T	major	0.991131
all_trials_avg_SpkLen_cm	S03_477602723	3	477602723	1.01762	1.17258	A	C	0.0210643	C	minor	0.0210643
all_trials_avg_SpkLen_cm	S04_5654320	4	5654320	-0.0929024	0.123822	G	C	0.435698	C	minor	0.435698
all_trials_avg_SpkLen_cm	S04_31032972	4	31032972	-0.942305	0.707086	G	A	0.0144124	A	minor	0.0144124
all_trials_avg_SpkLen_cm	S04_35525008	4	35525008	0.566023	0.375344	C	A	0.0210643	C	major	0.978936
all_trials_avg_SpkLen_cm	S04_48117627	4	48117627	0.158281	0.196239	A	G	0.161863	G	minor	0.161863
all_trials_avg_SpkLen_cm	S04_99870528	4	99870528	0.746009	0.141768	C	T	0.00443459	T	minor	0.00443459
all_trials_avg_SpkLen_cm	S04_103131373	4	103131373	-0.270342	0.0850564	T	A	0.0210643	A	minor	0.0210643
all_trials_avg_SpkLen_cm	S04_119394068	4	119394068	0.239759	0.08872	A	C	0.0277162	C	minor	0.0277162
all_trials_avg_SpkLen_cm	S04_137847829	4	137847829	-0.328676	0.125103	T	C	0.0210643	C	minor	0.0210643
all_trials_avg_SpkLen_cm	S04_199697392	4	199697392	0.940976	0.252331	G	T	0.00554324	T	minor	0.00554324
all_trials_avg_SpkLen_cm	S04_220130053	4	220130053	-0.172696	0.0178742	G	A	0.0121951	A	minor	0.0121951
all_trials_avg_SpkLen_cm	S04_239757520	4	239757520	0.323143	0.233972	G	A	0.094235	G	major	0.905765
all_trials_avg_SpkLen_cm	S04_261858888	4	261858888	-0.116778	0.0330586	G	A	0.103104	A	minor	0.103104
all_trials_avg_SpkLen_cm	S05_57840749	5	57840749	0.475481	0.151851	T	C	0.0121951	T	major	0.987805
all_trials_avg_SpkLen_cm	S05_366528709	5	366528709	0.0554617	0.0418042	A	G	0.455654	G	minor	0.455654
all_trials_avg_SpkLen_cm	S05_397289341	5	397289341	-1.53172	0.301472	G	A	0.0022173	A	minor	0.0022173
all_trials_avg_SpkLen_cm	S06_27073124	6	27073124	-0.216233	0.0312648	C	T	0.0121951	C	major	0.987805
all_trials_avg_SpkLen_cm	S06_30049280	6	30049280	-0.145882	0.0506387	A	C	0.101996	A	major	0.898004
all_trials_avg_SpkLen_cm	S06_166357566	6	166357566	-1.03444	0.30932	G	A	0.00554324	A	minor	0.00554324
all_trials_avg_SpkLen_cm	S06_347530512	6	347530512	0.228337	0.0349311	G	A	0.0121951	G	major	0.987805
all_trials_avg_SpkLen_cm	S06_373070997	6	373070997	-0.887077	0.994641	G	A	0.0221729	A	minor	0.0221729
all_trials_avg_SpkLen_cm	S06_480699953	6	480699953	-0.496723	0.0953458	A	T	0.00665188	A	major	0.993348
all_trials_avg_SpkLen_cm	S06_510179340	6	510179340	0.156179	0.327153	A	G	0.455654	G	minor	0.455654
all_trials_avg_SpkLen_cm	S06_518578819	6	518578819	-0.176587	0.422386	C	G	0.422395	C	major	0.577605
all_trials_avg_SpkLen_cm	S06_568793265	6	568793265	-0.129378	0.238621	G	A	0.424612	A	minor	0.424612
all_trials_avg_SpkLen_cm	S07_12079084	7	12079084	-0.0841287	0.0239397	A	G	0.0654102	A	major	0.93459
all_trials_avg_SpkLen_cm	S07_91555077	7	91555077	0.419084	0.139698	C	T	0.0144124	T	minor	0.0144124
all_trials_avg_SpkLen_cm	S07_103055343	7	103055343	-1.50155	4.05498	C	G	0.0687361	C	major	0.931264
all_trials_avg_SpkLen_cm	S07_156597465	7	156597465	0.200737	0.0217922	C	T	0.00997783	T	minor	0.00997783
all_trials_avg_SpkLen_cm	S07_226848353	7	226848353	-0.102406	0.0196969	G	A	0.0742794	A	minor	0.0742794
all_trials_avg_SpkLen_cm	S07_516499740	7	516499740	-0.0320558	0.0139483	A	G	0.440133	A	major	0.559867
all_trials_avg_SpkLen_cm	S08_67484386	8	67484386	1.74705	2.43018	A	G	0.0144124	G	minor	0.0144124
all_trials_avg_SpkLen_cm	S08_121556108	8	121556108	0.552284	0.71938	C	T	0.0986696	T	minor	0.0986696
all_trials_avg_SpkLen_cm	S08_197291732	8	197291732	-0.477481	0.428571	C	T	0.0731707	C	major	0.926829
all_trials_avg_SpkLen_cm	S08_324506204	8	324506204	0.265166	0.153671	A	G	0.0898004	G	minor	0.0898004
all_trials_avg_SpkLen_cm	S08_425968180	8	425968180	-0.0901359	0.107896	C	G	0.371397	C	major	0.628603
all_trials_avg_SpkLen_cm	S09_61869885	9	61869885	-0.104713	0.0663796	G	C	0.117517	C	minor	0.117517
all_trials_avg_SpkLen_cm	S09_315677404	9	315677404	-0.0914015	0.0183174	C	A	0.0886918	A	minor	0.0886918
all_trials_avg_SpkLen_cm	S09_385133100	9	385133100	0.138527	0.134877	G	A	0.140798	G	major	0.859202
all_trials_avg_SpkLen_cm	S09_415851589	9	415851589	1.04842	2.18265	C	T	0.0853659	T	minor	0.0853659
all_trials_avg_SpkLen_cm	S10_10944243	10	10944243	0.054931	0.00278711	G	A	0.0166297	G	major	0.98337
all_trials_avg_SpkLen_cm	S10_62112342	10	62112342	-0.0707396	0.0653709	T	C	0.365854	C	minor	0.365854
all_trials_avg_SpkLen_cm	S10_120456859	10	120456859	-0.755993	0.917279	G	A	0.059867	A	minor	0.059867
all_trials_avg_SpkLen_cm	S10_447491711	10	447491711	3.01376	2.62882	A	G	0.00554324	G	minor	0.00554324
all_trials_avg_SpkLen_cm	S10_459839942	10	459839942	1.25069	2.52236	G	T	0.0609756	T	minor	0.0609756
all_trials_avg_SpkLen_cm	S10_463199055	10	463199055	-0.705047	0.0642324	A	C	0.0022173	A	major	0.997783
all_trials_avg_SpkLen_cm	S11_6019252	11	6019252	-0.103392	0.153586	G	A	0.471175	A	minor	0.471175
all_trials_avg_SpkLen_cm	S11_52972239	11	52972239	0.832876	0.960364	C	G	0.0254989	G	minor	0.0254989
all_trials_avg_SpkLen_cm	S11_59775443	11	59775443	0.0581361	0.0110582	C	T	0.0609756	T	minor	0.0609756
all_trials_avg_SpkLen_cm	S11_161626009	11	161626009	-0.0542861	0.000846049	A	G	0.00554324	A	major	0.994457
all_trials_avg_SpkLen_cm	S11_191637589	11	191637589	0.64535	0.0672041	T	C	0.00332594	T	major	0.996674
all_trials_avg_SpkLen_cm	S11_211702566	11	211702566	0.467143	0.209548	C	A	0.0210643	C	major	0.978936
all_trials_avg_SpkLen_cm	S11_227848416	11	227848416	-0.391363	0.0395424	G	A	0.00443459	A	minor	0.00443459
all_trials_avg_SpkLen_cm	S11_235603452	11	235603452	-0.034358	0.0171968	G	A	0.491131	A	minor	0.491131
all_trials_avg_SpkLen_cm	S11_241092955	11	241092955	0.083413	0.0982287	T	A	0.411308	T	major	0.588692
all_trials_avg_SpkLen_cm	S12_25712846	12	25712846	-0.028542	0.0095975	C	T	0.284922	C	major	0.715078
all_trials_avg_SpkLen_cm	S12_87898328	12	87898328	-0.243303	0.118753	A	G	0.0798226	A	major	0.920177
all_trials_avg_SpkLen_cm	S13_9159276	13	9159276	0.340507	0.033606	G	A	0.00554324	G	major	0.994457
all_trials_avg_SpkLen_cm	S13_9595560	13	9595560	0.861932	0.286759	C	T	0.00665188	T	minor	0.00665188
all_trials_avg_SpkLen_cm	S13_17051098	13	17051098	0.236219	0.316315	A	G	0.109756	G	minor	0.109756
all_trials_avg_SpkLen_cm	S13_29748874	13	29748874	-1.09263	1.16566	G	A	0.018847	A	minor	0.018847
all_trials_avg_SpkLen_cm	S13_51976779	13	51976779	-0.0624038	0.0550866	T	A	0.488914	A	minor	0.488914
all_trials_avg_SpkLen_cm	S13_58962015	13	58962015	-1.23651	1.79377	G	A	0.0210643	A	minor	0.0210643
all_trials_avg_SpkLen_cm	S13_134782913	13	134782913	0.233004	0.0225648	C	T	0.00776053	T	minor	0.00776053
all_trials_avg_SpkLen_cm	S13_135391210	13	135391210	0.331012	0.0732509	C	T	0.0121951	T	minor	0.0121951
all_trials_avg_SpkLen_cm	S13_209539816	13	209539816	-0.201031	0.0473224	C	G	0.0210643	C	major	0.978936
all_trials_avg_SpkLen_cm	S13_222536639	13	222536639	-0.329576	0.0591319	G	A	0.00997783	A	minor	0.00997783
all_trials_avg_SpkLen_cm	S13_245158348	13	245158348	-0.666413	0.453107	G	C	0.018847	C	minor	0.018847
all_trials_avg_SpkLen_cm	S13_248290754	13	248290754	-0.0943969	0.0643161	A	G	0.145233	A	major	0.854767
all_trials_avg_SpkLen_cm	S13_252462690	13	252462690	-0.356838	1.19596	G	C	0.2051	C	minor	0.2051
all_trials_avg_SpkLen_cm	S13_265039502	13	265039502	2.65734	2.95004	A	G	0.00776053	G	minor	0.00776053
all_trials_avg_SpkLen_cm	S13_273891126	13	273891126	-0.390431	0.0944254	G	C	0.0110865	C	minor	0.0110865
all_trials_avg_SpkLen_cm	S14_76804610	14	76804610	-0.506893	2.64035	C	T	0.233925	C	major	0.766075
all_trials_avg_SpkLen_cm	S14_159035766	14	159035766	0.0484172	0.00154473	C	T	0.0121951	T	minor	0.0121951
all_trials_avg_SpkLen_cm	S14_224203729	14	224203729	-0.452998	0.17772	A	G	0.0155211	A	major	0.984479
all_trials_avg_SpkLen_cm	S14_234445278	14	234445278	-0.223761	0.681993	G	A	0.372506	A	minor	0.372506
all_trials_avg_SpkLen_cm	S14_326710436	14	326710436	-0.377282	0.48407	G	A	0.0620843	A	minor	0.0620843
all_trials_avg_SpkLen_cm	S14_496475519	14	496475519	-0.520194	0.173235	C	A	0.0110865	A	minor	0.0110865
all_trials_avg_SpkLen_cm	S15_349866048	15	349866048	-0.12671	0.0389186	G	C	0.104213	C	minor	0.104213
all_trials_avg_SpkLen_cm	S15_374356928	15	374356928	-0.736842	0.485104	C	T	0.0155211	C	major	0.984479
all_trials_avg_SpkLen_cm	S15_387961489	15	387961489	0.491711	0.09335	G	A	0.00665188	G	major	0.993348
all_trials_avg_SpkLen_cm	S15_412358042	15	412358042	-0.0745891	0.0651771	T	G	0.282705	G	minor	0.282705
all_trials_avg_SpkLen_cm	S15_566727557	15	566727557	-0.441837	0.104706	A	C	0.00997783	A	major	0.990022
all_trials_avg_SpkLen_cm	S15_582877307	15	582877307	0.575386	0.84927	T	G	0.0487805	T	major	0.95122
all_trials_avg_SpkLen_cm	S15_600918584	15	600918584	-0.0628581	0.0435881	C	T	0.25388	C	major	0.74612
all_trials_avg_SpkLen_cm	S16_31792648	16	31792648	-0.519317	0.265421	T	C	0.018847	C	minor	0.018847
all_trials_avg_SpkLen_cm	S16_229832414	16	229832414	-0.464186	0.373328	G	A	0.0731707	A	minor	0.0731707
all_trials_avg_SpkLen_cm	S16_242132329	16	242132329	0.0717167	0.0735555	C	G	0.480044	G	minor	0.480044
all_trials_avg_SpkLen_cm	S16_263001852	16	263001852	0.0531755	0.0135206	G	A	0.094235	G	major	0.905765
all_trials_avg_SpkLen_cm	S16_296781475	16	296781475	0.274665	0.174791	G	A	0.0986696	G	major	0.90133
all_trials_avg_SpkLen_cm	S16_336657077	16	336657077	0.0669815	0.0626746	T	A	0.411308	T	major	0.588692
all_trials_avg_SpkLen_cm	S16_336657091	16	336657091	-0.00679406	0.00050091	A	C	0.247228	A	major	0.752772
all_trials_avg_SpkLen_cm	S16_399342247	16	399342247	-0.980764	0.730692	C	T	0.0133038	C	major	0.986696
all_trials_avg_SpkLen_cm	S17_108653775	17	108653775	0.0219568	0.00111252	T	C	0.0964523	T	major	0.903548
all_trials_avg_SpkLen_cm	S17_108653809	17	108653809	0.0740519	0.012571	C	T	0.0953437	T	minor	0.0953437
all_trials_avg_SpkLen_cm	S17_239233309	17	239233309	-0.115575	0.0315019	C	T	0.103104	C	major	0.896896
all_trials_avg_SpkLen_cm	S17_286648169	17	286648169	0.298095	0.0557604	T	C	0.0110865	T	major	0.988914
all_trials_avg_SpkLen_cm	S18_31933921	18	31933921	-0.0362196	0.00277202	C	T	0.037694	C	major	0.962306
all_trials_avg_SpkLen_cm	S18_62374700	18	62374700	-0.0557462	0.0059222	G	A	0.0343681	A	minor	0.0343681
all_trials_avg_SpkLen_cm	S18_75576716	18	75576716	-0.585686	0.368638	T	C	0.0199557	C	minor	0.0199557
all_trials_avg_SpkLen_cm	S18_112460873	18	112460873	-0.620431	0.624677	G	A	0.0609756	A	minor	0.0609756
all_trials_avg_SpkLen_cm	S18_182594987	18	182594987	0.301484	0.191506	G	T	0.0842572	T	minor	0.0842572
all_trials_avg_SpkLen_cm	S18_412960071	18	412960071	-0.274134	0.175908	A	G	0.0964523	A	major	0.903548
all_trials_avg_SpkLen_cm	S18_426508862	18	426508862	-0.253406	0.0242598	G	T	0.00665188	G	major	0.993348
all_trials_avg_SpkLen_cm	S18_482517030	18	482517030	-0.155951	0.0402375	G	A	0.0620843	A	minor	0.0620843
all_trials_avg_SpkLen_cm	S18_545444320	18	545444320	-1.21476	2.75113	G	A	0.0764967	A	minor	0.0764967
all_trials_avg_SpkLen_cm	S19_70012848	19	70012848	-0.0638317	0.00718026	G	A	0.0676275	A	minor	0.0676275
all_trials_avg_SpkLen_cm	S19_124074654	19	124074654	0.0658767	0.0437954	G	A	0.221729	G	major	0.778271
all_trials_avg_SpkLen_cm	S19_543224680	19	543224680	1.9997	4.1001	A	C	0.018847	C	minor	0.018847
all_trials_avg_SpkLen_cm	S19_551502245	19	551502245	-1.10379	0.19586	C	A	0.00332594	A	minor	0.00332594
all_trials_avg_SpkLen_cm	S19_634869001	19	634869001	-0.480075	2.98887	T	C	0.333703	C	minor	0.333703
all_trials_avg_SpkLen_cm	S19_677800667	19	677800667	-0.243141	0.154126	T	A	0.0964523	A	minor	0.0964523
all_trials_avg_SpkLen_cm	S19_692361944	19	692361944	0.350253	0.314399	G	T	0.0920177	T	minor	0.0920177
all_trials_avg_SpkLen_cm	S19_736363601	19	736363601	0.245993	0.65897	C	G	0.344789	G	minor	0.344789
all_trials_avg_SpkLen_cm	S20_35656076	20	35656076	0.0232588	0.0048754	G	T	0.194013	T	minor	0.194013
all_trials_avg_SpkLen_cm	S20_89189834	20	89189834	0.254608	0.0352315	A	G	0.00997783	G	minor	0.00997783
all_trials_avg_SpkLen_cm	S20_148333930	20	148333930	-0.0911762	0.0184978	C	A	0.0909091	A	minor	0.0909091
all_trials_avg_SpkLen_cm	S20_158929692	20	158929692	0.216735	0.0181528	A	G	0.00665188	G	minor	0.00665188
all_trials_avg_SpkLen_cm	S20_339143703	20	339143703	0.310806	0.238717	G	A	0.104213	G	major	0.895787
all_trials_avg_SpkLen_cm	S20_404723936	20	404723936	-0.241106	0.0224406	A	T	0.00665188	A	major	0.993348
all_trials_avg_SpkLen_cm	S20_405356717	20	405356717	-0.075681	0.0820486	T	A	0.464523	A	minor	0.464523
all_trials_avg_SpkLen_cm	S20_488953056	20	488953056	-0.039143	0.00140393	C	G	0.0166297	C	major	0.98337
all_trials_avg_SpkLen_cm	S20_580880025	20	580880025	0.400494	0.100688	A	G	0.0110865	G	minor	0.0110865
all_trials_avg_SpkLen_cm	S20_603356555	20	603356555	0.327504	0.163666	A	C	0.0277162	C	minor	0.0277162
all_trials_avg_SpkLen_cm	S21_66129792	21	66129792	-0.313918	0.0492546	C	G	0.00886918	C	major	0.991131
all_trials_avg_SpkLen_cm	S21_86037764	21	86037764	-0.00445387	0.000131614	T	C	0.13082	C	minor	0.13082
all_trials_avg_SpkLen_cm	S21_90650201	21	90650201	0.0523435	0.0374878	T	C	0.378049	T	major	0.621951
all_trials_avg_SpkLen_cm	S21_90762051	21	90762051	0.0542861	0.000846049	T	C	0.00554324	T	major	0.994457
all_trials_avg_SpkLen_cm	S21_118538093	21	118538093	-0.091531	0.0064297	G	A	0.0133038	A	minor	0.0133038
all_trials_avg_SpkLen_cm	S21_187878445	21	187878445	-0.698889	0.141267	T	A	0.00554324	A	minor	0.00554324
all_trials_avg_SpkLen_cm	S21_202424506	21	202424506	-0.363349	0.0382805	G	A	0.00554324	A	minor	0.00554324
all_trials_avg_SpkLen_cm	S21_411630228	21	411630228	-0.636341	0.102978	C	T	0.00443459	C	major	0.995565
all_trials_avg_SpkLen_cm	S21_440793454	21	440793454	-0.980196	0.124253	C	T	0.0022173	C	major	0.997783
all_trials_avg_Spklt_num	S01_29528910	1	29528910	-0.221078	0.196938	G	A	0.0365854	A	minor	0.0365854
all_trials_avg_Spklt_num	S01_425640986	1	425640986	-0.10488	0.00655136	C	G	0.00554324	C	major	0.994457
all_trials_avg_Spklt_num	S01_440284589	1	440284589	0.317421	0.0837949	G	C	0.00776053	G	major	0.992239
all_trials_avg_Spklt_num	S01_441127557	1	441127557	-0.0311995	0.000512062	G	C	0.00443459	C	minor	0.00443459
all_trials_avg_Spklt_num	S01_448040019	1	448040019	-0.472078	1.01001	G	A	0.0388027	A	minor	0.0388027
all_trials_avg_Spklt_num	S02_21200739	2	21200739	-0.13587	0.0160113	C	T	0.00776053	C	major	0.992239
all_trials_avg_Spklt_num	S02_86294469	2	86294469	-0.183642	0.849443	A	G	0.332594	A	major	0.667406
all_trials_avg_Spklt_num	S02_110750907	2	110750907	-0.0176781	0.00774236	C	T	0.329268	C	major	0.670732
all_trials_avg_Spklt_num	S02_120531680	2	120531680	-0.33186	0.381392	A	T	0.0676275	A	major	0.932373
all_trials_avg_Spklt_num	S02_132955695	2	132955695	0.690131	0.777471	A	G	0.0144124	G	minor	0.0144124
all_trials_avg_Spklt_num	S02_143430838	2	143430838	0.318331	0.319188	C	T	0.0643016	T	minor	0.0643016
all_trials_avg_Spklt_num	S02_163841443	2	163841443	-0.273715	0.342211	A	G	0.094235	A	major	0.905765
all_trials_avg_Spklt_num	S02_280450209	2	280450209	1.3408	1.44438	G	A	0.00665188	G	major	0.993348
all_trials_avg_Spklt_num	S02_327466245	2	327466245	0.352395	0.132547	C	T	0.00886918	T	minor	0.00886918
all_trials_avg_Spklt_num	S02_403257803	2	403257803	-0.84868	2.90385	T	G	0.0831486	G	minor	0.0831486
all_trials_avg_Spklt_num	S03_58073504	3	58073504	-0.15012	0.517142	G	A	0.338137	A	minor	0.338137
all_trials_avg_Spklt_num	S03_290939373	3	290939373	0.216133	0.107643	G	A	0.0199557	G	major	0.980044
all_trials_avg_Spklt_num	S03_337625064	3	337625064	0.0441661	0.0534198	T	G	0.431264	T	major	0.568736
all_trials_avg_Spklt_num	S03_354805182	3	354805182	0.0740977	0.0217063	C	A	0.0332594	C	major	0.966741
all_trials_avg_Spklt_num	S03_407190205	3	407190205	-0.379152	0.698472	A	G	0.104213	A	major	0.895787
all_trials_avg_Spklt_num	S03_431611782	3	431611782	-0.215155	0.0495919	T	A	0.00886918	A	minor	0.00886918
all_trials_avg_Spklt_num	S03_477602723	3	477602723	0.475544	0.524914	A	C	0.0210643	C	minor	0.0210643
all_trials_avg_Spklt_num	S04_5654320	4	5654320	0.139186	0.554588	G	C	0.435698	G	major	0.564302
all_trials_avg_Spklt_num	S04_31032972	4	31032972	-1.28681	2.66339	G	A	0.0144124	A	minor	0.0144124
all_trials_avg_Spklt_num	S04_35525008	4	35525008	-0.298402	0.207843	C	A	0.0210643	A	minor	0.0210643
all_trials_avg_Spklt_num	S04_48117627	4	48117627	0.37566	2.16379	A	G	0.161863	G	minor	0.161863
all_trials_avg_Spklt_num	S04_99870528	4	99870528	0.0553825	0.001629	C	T	0.00443459	T	minor	0.00443459
all_trials_avg_Spklt_num	S04_103131373	4	103131373	-0.701103	1.14329	T	A	0.0210643	A	minor	0.0210643
all_trials_avg_Spklt_num	S04_119394068	4	119394068	0.220451	0.152096	A	C	0.0277162	C	minor	0.0277162
all_trials_avg_Spklt_num	S04_137847829	4	137847829	-1.02293	2.39061	T	C	0.0210643	C	minor	0.0210643
all_trials_avg_Spklt_num	S04_199697392	4	199697392	1.3658	1.07072	G	T	0.00554324	T	minor	0.00554324
all_trials_avg_Spklt_num	S04_220130053	4	220130053	-0.747526	0.658666	G	A	0.0121951	A	minor	0.0121951
all_trials_avg_Spklt_num	S04_239757520	4	239757520	-0.327171	0.478334	G	A	0.094235	A	minor	0.094235
all_trials_avg_Spklt_num	S04_261858888	4	261858888	0.35778	0.641162	G	A	0.103104	G	major	0.896896
all_trials_avg_Spklt_num	S05_57840749	5	57840749	0.419101	0.237847	T	C	0.0121951	T	major	0.987805
all_trials_avg_Spklt_num	S05_366528709	5	366528709	-0.0606555	0.0973461	A	G	0.455654	A	major	0.544346
all_trials_avg_Spklt_num	S05_397289341	5	397289341	-0.351689	0.0325599	G	A	0.0022173	A	minor	0.0022173
all_trials_avg_Spklt_num	S06_27073124	6	27073124	0.464251	0.289149	C	T	0.0121951	T	minor	0.0121951
all_trials_avg_Spklt_num	S06_30049280	6	30049280	0.498822	1.16755	A	C	0.101996	C	minor	0.101996
all_trials_avg_Spklt_num	S06_166357566	6	166357566	-0.043599	0.00112497	G	A	0.00554324	A	minor	0.00554324
all_trials_avg_Spklt_num	S06_347530512	6	347530512	-0.335597	0.159858	G	A	0.0121951	A	minor	0.0121951
all_trials_avg_Spklt_num	S06_373070997	6	373070997	-0.735574	1.40029	G	A	0.0221729	A	minor	0.0221729
all_trials_avg_Spklt_num	S06_480699953	6	480699953	-0.0853971	0.00586122	A	T	0.00665188	A	major	0.993348
all_trials_avg_Spklt_num	S06_510179340	6	510179340	-0.0464126	0.0564242	A	G	0.455654	A	major	0.544346
all_trials_avg_Spklt_num	S06_518578819	6	518578819	-0.181417	0.86306	C	G	0.422395	C	major	0.577605
all_trials_avg_Spklt_num	S06_568793265	6	568793265	0.112992	0.360219	G	A	0.424612	G	major	0.575388
all_trials_avg_Spklt_num	S07_12079084	7	12079084	-0.414639	1.18773	A	G	0.0654102	A	major	0.93459
all_trials_avg_Spklt_num	S07_91555077	7	91555077	0.87672	1.23599	C	T	0.0144124	T	minor	0.0144124
all_trials_avg_Spklt_num	S07_103055343	7	103055343	0.58015	1.19947	C	G	0.0687361	G	minor	0.0687361
all_trials_avg_Spklt_num	S07_156597465	7	156597465	-0.489568	0.270866	C	T	0.00997783	C	major	0.990022
all_trials_avg_Spklt_num	S07_226848353	7	226848353	-0.870382	2.84187	G	A	0.0742794	A	minor	0.0742794
all_trials_avg_Spklt_num	S07_516499740	7	516499740	0.12322	0.416016	A	G	0.440133	G	minor	0.440133
all_trials_avg_Spklt_num	S08_67484386	8	67484386	0.0306709	0.00153942	A	G	0.0144124	G	minor	0.0144124
all_trials_avg_Spklt_num	S08_121556108	8	121556108	-0.626537	1.84629	C	T	0.0986696	C	major	0.90133
all_trials_avg_Spklt_num	S08_197291732	8	197291732	0.791617	2.40667	C	T	0.0731707	T	minor	0.0731707
all_trials_avg_Spklt_num	S08_324506204	8	324506204	0.31157	0.425897	A	G	0.0898004	G	minor	0.0898004
all_trials_avg_Spklt_num	S08_425968180	8	425968180	-0.131009	0.44996	C	G	0.371397	C	major	0.628603
all_trials_avg_Spklt_num	S09_61869885	9	61869885	0.0189354	0.00440879	G	C	0.117517	G	major	0.882483
all_trials_avg_Spklt_num	S09_315677404	9	315677404	-0.860996	3.24946	C	A	0.0886918	A	minor	0.0886918
all_trials_avg_Spklt_num	S09_385133100	9	385133100	0.067845	0.0648159	G	A	0.140798	G	major	0.859202
all_trials_avg_Spklt_num	S09_415851589	9	415851589	0.216043	0.185315	C	T	0.0853659	T	minor	0.0853659
all_trials_avg_Spklt_num	S10_10944243	10	10944243	-0.0478734	0.00436644	G	A	0.0166297	A	minor	0.0166297
all_trials_avg_Spklt_num	S10_62112342	10	62112342	-0.0368822	0.0353841	T	C	0.365854	C	minor	0.365854
all_trials_avg_Spklt_num	S10_120456859	10	120456859	0.421232	0.58526	G	A	0.059867	G	major	0.940133
all_trials_avg_Spklt_num	S10_447491711	10	447491711	0.700161	0.291625	A	G	0.00554324	G	minor	0.00554324
all_trials_avg_Spklt_num	S10_459839942	10	459839942	0.364104	0.429457	G	T	0.0609756	T	minor	0.0609756
all_trials_avg_Spklt_num	S10_463199055	10	463199055	-0.701596	0.134037	A	C	0.0022173	A	major	0.997783
all_trials_avg_Spklt_num	S11_6019252	11	6019252	0.236038	1.53054	G	A	0.471175	G	major	0.528825
all_trials_avg_Spklt_num	S11_52972239	11	52972239	0.657937	1.19969	C	G	0.0254989	G	minor	0.0254989
all_trials_avg_Spklt_num	S11_59775443	11	59775443	0.189794	0.238059	C	T	0.0609756	T	minor	0.0609756
all_trials_avg_Spklt_num	S11_161626009	11	161626009	0.103086	0.00602043	A	G	0.00554324	G	minor	0.00554324
all_trials_avg_Spklt_num	S11_191637589	11	191637589	-0.152001	0.00774994	T	C	0.00332594	C	minor	0.00332594
all_trials_avg_Spklt_num	S11_211702566	11	211702566	1.17431	2.74528	C	A	0.0210643	C	major	0.978936
all_trials_avg_Spklt_num	S11_227848416	11	227848416	0.69998	0.26514	G	A	0.00443459	G	major	0.995565
all_trials_avg_Spklt_num	S11_235603452	11	235603452	0.0355624	0.0350614	G	A	0.491131	G	major	0.508869
all_trials_avg_Spklt_num	S11_241092955	11	241092955	0.238796	1.55902	T	A	0.411308	T	major	0.588692
all_trials_avg_Spklt_num	S12_25712846	12	25712846	-0.356036	3.00839	C	T	0.284922	C	major	0.715078
all_trials_avg_Spklt_num	S12_87898328	12	87898328	0.184326	0.134469	A	G	0.0798226	G	minor	0.0798226
all_trials_avg_Spklt_num	S13_9159276	13	9159276	0.0416456	0.00104306	G	A	0.00554324	G	major	0.994457
all_trials_avg_Spklt_num	S13_9595560	13	9595560	-0.169885	0.0226114	C	T	0.00665188	C	major	0.993348
all_trials_avg_Spklt_num	S13_17051098	13	17051098	0.176378	0.34223	A	G	0.109756	G	minor	0.109756
all_trials_avg_Spklt_num	S13_29748874	13	29748874	-0.600832	0.694764	G	A	0.018847	A	minor	0.018847
all_trials_avg_Spklt_num	S13_51976779	13	51976779	-0.189194	1.01005	T	A	0.488914	A	minor	0.488914
all_trials_avg_Spklt_num	S13_58962015	13	58962015	-0.429897	0.441	G	A	0.0210643	A	minor	0.0210643
all_trials_avg_Spklt_num	S13_134782913	13	134782913	0.0442611	0.00161973	C	T	0.00776053	T	minor	0.00776053
all_trials_avg_Spklt_num	S13_135391210	13	135391210	0.163652	0.035855	C	T	0.0121951	T	minor	0.0121951
all_trials_avg_Spklt_num	S13_209539816	13	209539816	0.186507	0.0827288	C	G	0.0210643	G	minor	0.0210643
all_trials_avg_Spklt_num	S13_222536639	13	222536639	-0.366223	0.147931	G	A	0.00997783	A	minor	0.00997783
all_trials_avg_Spklt_num	S13_245158348	13	245158348	-0.304913	0.194908	G	C	0.018847	C	minor	0.018847
all_trials_avg_Spklt_num	S13_248290754	13	248290754	0.191279	0.528531	A	G	0.145233	G	minor	0.145233
all_trials_avg_Spklt_num	S13_252462690	13	252462690	-0.216894	0.905033	G	C	0.2051	C	minor	0.2051
all_trials_avg_Spklt_num	S13_265039502	13	265039502	0.669873	0.387289	A	G	0.00776053	G	minor	0.00776053
all_trials_avg_Spklt_num	S13_273891126	13	273891126	-0.422816	0.225325	G	C	0.0110865	C	minor	0.0110865
all_trials_avg_Spklt_num	S14_76804610	14	76804610	-0.121706	0.309251	C	T	0.233925	C	major	0.766075
all_trials_avg_Spklt_num	S14_159035766	14	159035766	-0.126409	0.0216035	C	T	0.0121951	C	major	0.987805
all_trials_avg_Spklt_num	S14_224203729	14	224203729	-0.623344	0.692993	A	G	0.0155211	A	major	0.984479
all_trials_avg_Spklt_num	S14_234445278	14	234445278	-0.157621	0.672441	G	A	0.372506	A	minor	0.372506
all_trials_avg_Spklt_num	S14_326710436	14	326710436	-0.361651	0.912344	G	A	0.0620843	A	minor	0.0620843
all_trials_avg_Spklt_num	S14_496475519	14	496475519	0.112018	0.0165223	C	A	0.0110865	C	major	0.988914
all_trials_avg_Spklt_num	S15_349866048	15	349866048	-0.869146	3.68818	G	C	0.104213	C	minor	0.104213
all_trials_avg_Spklt_num	S15_374356928	15	374356928	-0.904034	1.51516	C	T	0.0155211	C	major	0.984479
all_trials_avg_Spklt_num	S15_387961489	15	387961489	0.795182	0.503249	G	A	0.00665188	G	major	0.993348
all_trials_avg_Spklt_num	S15_412358042	15	412358042	0.0469077	0.0505169	T	G	0.282705	T	major	0.717295
all_trials_avg_Spklt_num	S15_566727557	15	566727557	0.206698	0.0471143	A	C	0.00997783	C	minor	0.00997783
all_trials_avg_Spklt_num	S15_582877307	15	582877307	-0.0263785	0.00362016	T	G	0.0487805	G	minor	0.0487805
all_trials_avg_Spklt_num	S15_600918584	15	600918584	-0.418809	3.87424	C	T	0.25388	C	major	0.74612
all_trials_avg_Spklt_num	S16_31792648	16	31792648	-0.429583	0.373556	T	C	0.018847	C	minor	0.018847
all_trials_avg_Spklt_num	S16_229832414	16	229832414	0.348954	0.425155	G	A	0.0731707	G	major	0.926829
all_trials_avg_Spklt_num	S16_242132329	16	242132329	-0.311785	2.6003	C	G	0.480044	C	major	0.519956
all_trials_avg_Spklt_num	S16_263001852	16	263001852	0.074632	0.0537696	G	A	0.094235	G	major	0.905765
all_trials_avg_Spklt_num	S16_296781475	16	296781475	-0.781067	2.68833	G	A	0.0986696	A	minor	0.0986696
all_trials_avg_Spklt_num	S16_336657077	16	336657077	-0.150544	0.640671	T	A	0.411308	A	minor	0.411308
all_trials_avg_Spklt_num	S16_336657091	16	336657091	-0.030932	0.020843	A	C	0.247228	A	major	0.752772
all_trials_avg_Spklt_num	S16_399342247	16	399342247	-0.584162	0.525196	C	T	0.0133038	C	major	0.986696
all_trials_avg_Spklt_num	S17_108653775	17	108653775	-0.0293385	0.00392155	T	C	0.0964523	C	minor	0.0964523
all_trials_avg_Spklt_num	S17_108653809	17	108653809	0.00308991	4.31712e-05	C	T	0.0953437	T	minor	0.0953437
all_trials_avg_Spklt_num	S17_239233309	17	239233309	0.215232	0.211209	C	T	0.103104	T	minor	0.103104
all_trials_avg_Spklt_num	S17_286648169	17	286648169	-0.448473	0.253354	T	C	0.0110865	C	minor	0.0110865
all_trials_avg_Spklt_num	S18_31933921	18	31933921	0.359318	0.571896	C	T	0.037694	T	minor	0.037694
all_trials_avg_Spklt_num	S18_62374700	18	62374700	-0.370512	0.540067	G	A	0.0343681	A	minor	0.0343681
all_trials_avg_Spklt_num	S18_75576716	18	75576716	-0.467965	0.46588	T	C	0.0199557	C	minor	0.0199557
all_trials_avg_Spklt_num	S18_112460873	18	112460873	0.0424021	0.00587415	G	A	0.0609756	G	major	0.939024
all_trials_avg_Spklt_num	S18_182594987	18	182594987	0.837887	2.98658	G	T	0.0842572	T	minor	0.0842572
all_trials_avg_Spklt_num	S18_412960071	18	412960071	0.41717	0.807489	A	G	0.0964523	G	minor	0.0964523
all_trials_avg_Spklt_num	S18_426508862	18	426508862	0.532256	0.209094	G	T	0.00665188	T	minor	0.00665188
all_trials_avg_Spklt_num	S18_482517030	18	482517030	0.814558	2.19233	G	A	0.0620843	G	major	0.937916
all_trials_avg_Spklt_num	S18_545444320	18	545444320	0.475886	0.84378	G	A	0.0764967	G	major	0.923503
all_trials_avg_Spklt_num	S19_70012848	19	70012848	-0.915714	2.94647	G	A	0.0676275	A	minor	0.0676275
all_trials_avg_Spklt_num	S19_124074654	19	124074654	0.192034	0.736518	G	A	0.221729	G	major	0.778271
all_trials_avg_Spklt_num	S19_543224680	19	543224680	0.662252	0.926072	A	C	0.018847	C	minor	0.018847
all_trials_avg_Spklt_num	S19_551502245	19	551502245	-0.0176684	0.000103348	C	A	0.00332594	A	minor	0.00332594
all_trials_avg_Spklt_num	S19_634869001	19	634869001	-0.0430254	0.0474075	T	C	0.333703	C	minor	0.333703
all_trials_avg_Spklt_num	S19_677800667	19	677800667	0.583326	1.77148	T	A	0.0964523	T	major	0.903548
all_trials_avg_Spklt_num	S19_692361944	19	692361944	-0.137064	0.0974467	G	T	0.0920177	G	major	0.907982
all_trials_avg_Spklt_num	S19_736363601	19	736363601	0.328225	2.40183	C	G	0.344789	G	minor	0.344789
all_trials_avg_Spklt_num	S20_35656076	20	35656076	0.0851167	0.129201	G	T	0.194013	T	minor	0.194013
all_trials_avg_Spklt_num	S20_89189834	20	89189834	-0.244503	0.066219	A	G	0.00997783	A	major	0.990022
all_trials_avg_Spklt_num	S20_148333930	20	148333930	0.495253	1.10494	C	A	0.0909091	C	major	0.909091
all_trials_avg_Spklt_num	S20_158929692	20	158929692	-0.533527	0.229596	A	G	0.00665188	A	major	0.993348
all_trials_avg_Spklt_num	S20_339143703	20	339143703	-0.0497906	0.0123573	G	A	0.104213	A	minor	0.104213
all_trials_avg_Spklt_num	S20_404723936	20	404723936	0.357955	0.103547	A	T	0.00665188	T	minor	0.00665188
all_trials_avg_Spklt_num	S20_405356717	20	405356717	0.0630346	0.114979	T	A	0.464523	T	major	0.535477
all_trials_avg_Spklt_num	S20_488953056	20	488953056	-1.18039	2.61521	C	G	0.0166297	C	major	0.98337
all_trials_avg_Spklt_num	S20_580880025	20	580880025	0.112019	0.0163128	A	G	0.0110865	G	minor	0.0110865
all_trials_avg_Spklt_num	S20_603356555	20	603356555	0.459702	0.648278	A	C	0.0277162	C	minor	0.0277162
all_trials_avg_Spklt_num	S21_66129792	21	66129792	-0.418903	0.180777	C	G	0.00886918	C	major	0.991131
all_trials_avg_Spklt_num	S21_86037764	21	86037764	0.257331	0.866183	T	C	0.13082	T	major	0.86918
all_trials_avg_Spklt_num	S21_90650201	21	90650201	0.00156454	6.76814e-05	T	C	0.378049	T	major	0.621951
all_trials_avg_Spklt_num	S21_90762051	21	90762051	-0.103086	0.00602043	T	C	0.00554324	C	minor	0.00554324
all_trials_avg_Spklt_num	S21_118538093	21	118538093	0.16078	0.0402396	G	A	0.0133038	G	major	0.986696
all_trials_avg_Spklt_num	S21_187878445	21	187878445	0.223432	0.0289524	T	A	0.00554324	T	major	0.994457
all_trials_avg_Spklt_num	S21_202424506	21	202424506	0.843246	0.424031	G	A	0.00554324	G	major	0.994457
all_trials_avg_Spklt_num	S21_411630228	21	411630228	-0.115158	0.00668615	C	T	0.00443459	C	major	0.995565
all_trials_avg_Spklt_num	S21_440793454	21	440793454	-3.03206	2.44274	C	T	0.0022173	C	major	0.997783
all_trials_avg_SpkWt_g	S01_29528910	1	29528910	0.00152636	0.00086189	G	A	0.0365854	G	major	0.963415
all_trials_avg_SpkWt_g	S01_425640986	1	425640986	0.0856287	0.396195	C	G	0.00554324	G	minor	0.00554324
all_trials_avg_SpkWt_g	S01_440284589	1	440284589	0.158155	1.90721	G	C	0.00776053	G	major	0.992239
all_trials_avg_SpkWt_g	S01_441127557	1	441127557	0.153592	1.12908	G	C	0.00443459	G	major	0.995565
all_trials_avg_SpkWt_g	S01_448040019	1	448040019	-0.0153585	0.0964566	G	A	0.0388027	A	minor	0.0388027
all_trials_avg_SpkWt_g	S02_21200739	2	21200739	-0.0777111	0.474798	C	T	0.00776053	C	major	0.992239
all_trials_avg_SpkWt_g	S02_86294469	2	86294469	-0.00989045	0.227616	A	G	0.332594	A	major	0.667406
all_trials_avg_SpkWt_g	S02_110750907	2	110750907	-0.0174549	0.69615	C	T	0.329268	C	major	0.670732
all_trials_avg_SpkWt_g	S02_120531680	2	120531680	-0.0119203	0.0450134	A	T	0.0676275	A	major	0.932373
all_trials_avg_SpkWt_g	S02_132955695	2	132955695	0.0558098	0.462724	A	G	0.0144124	G	minor	0.0144124
all_trials_avg_SpkWt_g	S02_143430838	2	143430838	-0.0534718	0.825272	C	T	0.0643016	C	major	0.935698
all_trials_avg_SpkWt_g	S02_163841443	2	163841443	0.0550315	1.26964	A	G	0.094235	G	minor	0.094235
all_trials_avg_SpkWt_g	S02_280450209	2	280450209	0.159734	1.85685	G	A	0.00665188	G	major	0.993348
all_trials_avg_SpkWt_g	S02_327466245	2	327466245	0.115122	1.28236	C	T	0.00886918	T	minor	0.00886918
all_trials_avg_SpkWt_g	S02_403257803	2	403257803	-0.011368	0.0478314	T	G	0.0831486	G	minor	0.0831486
all_trials_avg_SpkWt_g	S03_58073504	3	58073504	0.00663033	0.0928467	G	A	0.338137	G	major	0.661863
all_trials_avg_SpkWt_g	S03_290939373	3	290939373	0.00241253	0.00122403	G	A	0.0199557	G	major	0.980044
all_trials_avg_SpkWt_g	S03_337625064	3	337625064	-0.0232851	1.36436	T	G	0.431264	G	minor	0.431264
all_trials_avg_SpkWt_g	S03_354805182	3	354805182	-0.0244483	0.213533	C	A	0.0332594	A	minor	0.0332594
all_trials_avg_SpkWt_g	S03_407190205	3	407190205	0.0284304	0.359557	A	G	0.104213	G	minor	0.104213
all_trials_avg_SpkWt_g	S03_431611782	3	431611782	0.0860118	0.716718	T	A	0.00886918	T	major	0.991131
all_trials_avg_SpkWt_g	S03_477602723	3	477602723	0.0653188	0.901629	A	C	0.0210643	C	minor	0.0210643
all_trials_avg_SpkWt_g	S04_5654320	4	5654320	-0.00874474	0.200772	G	C	0.435698	C	minor	0.435698
all_trials_avg_SpkWt_g	S04_31032972	4	31032972	-0.0863859	1.0972	G	A	0.0144124	A	minor	0.0144124
all_trials_avg_SpkWt_g	S04_35525008	4	35525008	0.00715195	0.010951	C	A	0.0210643	C	major	0.978936
all_trials_avg_SpkWt_g	S04_48117627	4	48117627	0.0448693	2.84776	A	G	0.161863	G	minor	0.161863
all_trials_avg_SpkWt_g	S04_99870528	4	99870528	0.00042015	8.49556e-06	C	T	0.00443459	T	minor	0.00443459
all_trials_avg_SpkWt_g	S04_103131373	4	103131373	-0.0262961	0.147466	T	A	0.0210643	A	minor	0.0210643
all_trials_avg_SpkWt_g	S04_119394068	4	119394068	-0.0252912	0.182748	A	C	0.0277162	A	major	0.972284
all_trials_avg_SpkWt_g	S04_137847829	4	137847829	-0.0487867	0.500437	T	C	0.0210643	C	minor	0.0210643
all_trials_avg_SpkWt_g	S04_199697392	4	199697392	-0.0410368	0.0885033	G	T	0.00554324	G	major	0.994457
all_trials_avg_SpkWt_g	S04_220130053	4	220130053	0.0405645	0.178621	G	A	0.0121951	G	major	0.987805
all_trials_avg_SpkWt_g	S04_239757520	4	239757520	-0.00244703	0.00245522	G	A	0.094235	A	minor	0.094235
all_trials_avg_SpkWt_g	S04_261858888	4	261858888	-0.0326545	0.484874	G	A	0.103104	A	minor	0.103104
all_trials_avg_SpkWt_g	S05_57840749	5	57840749	0.0774815	0.743285	T	C	0.0121951	T	major	0.987805
all_trials_avg_SpkWt_g	S05_366528709	5	366528709	0.0245215	1.46939	A	G	0.455654	G	minor	0.455654
all_trials_avg_SpkWt_g	S05_397289341	5	397289341	-0.031973	0.0245021	G	A	0.0022173	A	minor	0.0022173
all_trials_avg_SpkWt_g	S06_27073124	6	27073124	0.0313096	0.120423	C	T	0.0121951	T	minor	0.0121951
all_trials_avg_SpkWt_g	S06_30049280	6	30049280	0.0145434	0.0913231	A	C	0.101996	C	minor	0.101996
all_trials_avg_SpkWt_g	S06_166357566	6	166357566	0.0235506	0.0298954	G	A	0.00554324	G	major	0.994457
all_trials_avg_SpkWt_g	S06_347530512	6	347530512	-0.0238691	0.0728701	G	A	0.0121951	A	minor	0.0121951
all_trials_avg_SpkWt_g	S06_373070997	6	373070997	-0.104614	2.57911	G	A	0.0221729	A	minor	0.0221729
all_trials_avg_SpkWt_g	S06_480699953	6	480699953	-0.0997808	0.7253	A	T	0.00665188	A	major	0.993348
all_trials_avg_SpkWt_g	S06_510179340	6	510179340	0.0136038	0.447187	A	G	0.455654	G	minor	0.455654
all_trials_avg_SpkWt_g	S06_518578819	6	518578819	0.00872301	0.184614	C	G	0.422395	G	minor	0.422395
all_trials_avg_SpkWt_g	S06_568793265	6	568793265	-0.0105881	0.290854	G	A	0.424612	A	minor	0.424612
all_trials_avg_SpkWt_g	S07_12079084	7	12079084	-0.051171	1.64761	A	G	0.0654102	A	major	0.93459
all_trials_avg_SpkWt_g	S07_91555077	7	91555077	-0.00421131	0.00260336	C	T	0.0144124	C	major	0.985588
all_trials_avg_SpkWt_g	S07_103055343	7	103055343	-0.0282686	0.261471	C	G	0.0687361	C	major	0.931264
all_trials_avg_SpkWt_g	S07_156597465	7	156597465	0.0091143	0.00849495	C	T	0.00997783	T	minor	0.00997783
all_trials_avg_SpkWt_g	S07_226848353	7	226848353	-0.0350394	0.42204	G	A	0.0742794	A	minor	0.0742794
all_trials_avg_SpkWt_g	S07_516499740	7	516499740	0.0139015	0.483932	A	G	0.440133	G	minor	0.440133
all_trials_avg_SpkWt_g	S08_67484386	8	67484386	0.0505552	0.380176	A	G	0.0144124	G	minor	0.0144124
all_trials_avg_SpkWt_g	S08_121556108	8	121556108	0.0119947	0.0620461	C	T	0.0986696	T	minor	0.0986696
all_trials_avg_SpkWt_g	S08_197291732	8	197291732	-0.0121908	0.0519962	C	T	0.0731707	C	major	0.926829
all_trials_avg_SpkWt_g	S08_324506204	8	324506204	-0.00591132	0.0140403	A	G	0.0898004	A	major	0.9102
all_trials_avg_SpkWt_g	S08_425968180	8	425968180	0.00924163	0.205948	C	G	0.371397	G	minor	0.371397
all_trials_avg_SpkWt_g	S09_61869885	9	61869885	-0.0237506	0.63316	G	C	0.117517	C	minor	0.117517
all_trials_avg_SpkWt_g	S09_315677404	9	315677404	-0.00441137	0.00781842	C	A	0.0886918	A	minor	0.0886918
all_trials_avg_SpkWt_g	S09_385133100	9	385133100	0.0179413	0.415423	G	A	0.140798	G	major	0.859202
all_trials_avg_SpkWt_g	S09_415851589	9	415851589	0.0283904	0.293154	C	T	0.0853659	T	minor	0.0853659
all_trials_avg_SpkWt_g	S10_10944243	10	10944243	-0.00354937	0.00217914	G	A	0.0166297	A	minor	0.0166297
all_trials_avg_SpkWt_g	S10_62112342	10	62112342	-0.017015	0.691349	T	C	0.365854	C	minor	0.365854
all_trials_avg_SpkWt_g	S10_120456859	10	120456859	0.00558923	0.00936926	G	A	0.059867	G	major	0.940133
all_trials_avg_SpkWt_g	S10_447491711	10	447491711	0.125309	0.849449	A	G	0.00554324	G	minor	0.00554324
all_trials_avg_SpkWt_g	S10_459839942	10	459839942	0.0322508	0.308208	G	T	0.0609756	T	minor	0.0609756
all_trials_avg_SpkWt_g	S10_463199055	10	463199055	-0.221207	1.20351	A	C	0.0022173	A	major	0.997783
all_trials_avg_SpkWt_g	S11_6019252	11	6019252	0.01107	0.312554	G	A	0.471175	G	major	0.528825
all_trials_avg_SpkWt_g	S11_52972239	11	52972239	0.013415	0.0457165	C	G	0.0254989	G	minor	0.0254989
all_trials_avg_SpkWt_g	S11_59775443	11	59775443	-0.00967528	0.0565372	C	T	0.0609756	C	major	0.939024
all_trials_avg_SpkWt_g	S11_161626009	11	161626009	-0.107453	0.602064	A	G	0.00554324	A	major	0.994457
all_trials_avg_SpkWt_g	S11_191637589	11	191637589	0.064986	0.128329	T	C	0.00332594	T	major	0.996674
all_trials_avg_SpkWt_g	S11_211702566	11	211702566	0.047301	0.403924	C	A	0.0210643	C	major	0.978936
all_trials_avg_SpkWt_g	S11_227848416	11	227848416	0.11098	0.60252	G	A	0.00443459	G	major	0.995565
all_trials_avg_SpkWt_g	S11_235603452	11	235603452	-0.0136418	0.479375	G	A	0.491131	A	minor	0.491131
all_trials_avg_SpkWt_g	S11_241092955	11	241092955	0.0100717	0.256389	T	A	0.411308	T	major	0.588692
all_trials_avg_SpkWt_g	S12_25712846	12	25712846	-0.0051446	0.0574663	C	T	0.284922	C	major	0.715078
all_trials_avg_SpkWt_g	S12_87898328	12	87898328	-0.0189425	0.130555	A	G	0.0798226	A	major	0.920177
all_trials_avg_SpkWt_g	S13_9159276	13	9159276	0.0704942	0.270963	G	A	0.00554324	G	major	0.994457
all_trials_avg_SpkWt_g	S13_9595560	13	9595560	0.0417979	0.124945	C	T	0.00665188	T	minor	0.00665188
all_trials_avg_SpkWt_g	S13_17051098	13	17051098	-0.0197613	0.396995	A	G	0.109756	A	major	0.890244
all_trials_avg_SpkWt_g	S13_29748874	13	29748874	-0.0153053	0.0414852	G	A	0.018847	A	minor	0.018847
all_trials_avg_SpkWt_g	S13_51976779	13	51976779	-0.0237425	1.45845	T	A	0.488914	A	minor	0.488914
all_trials_avg_SpkWt_g	S13_58962015	13	58962015	-0.0858769	1.60474	G	A	0.0210643	A	minor	0.0210643
all_trials_avg_SpkWt_g	S13_134782913	13	134782913	-0.101299	0.778957	C	T	0.00776053	C	major	0.992239
all_trials_avg_SpkWt_g	S13_135391210	13	135391210	-0.0743082	0.677732	C	T	0.0121951	C	major	0.987805
all_trials_avg_SpkWt_g	S13_209539816	13	209539816	0.000876813	0.000166908	C	G	0.0210643	G	minor	0.0210643
all_trials_avg_SpkWt_g	S13_222536639	13	222536639	0.0570776	0.328338	G	A	0.00997783	G	major	0.990022
all_trials_avg_SpkWt_g	S13_245158348	13	245158348	0.0464266	0.411216	G	C	0.018847	G	major	0.981153
all_trials_avg_SpkWt_g	S13_248290754	13	248290754	0.00399667	0.0211549	A	G	0.145233	G	minor	0.145233
all_trials_avg_SpkWt_g	S13_252462690	13	252462690	-0.0486261	4.14067	G	C	0.2051	C	minor	0.2051
all_trials_avg_SpkWt_g	S13_265039502	13	265039502	0.12477	1.22099	A	G	0.00776053	G	minor	0.00776053
all_trials_avg_SpkWt_g	S13_273891126	13	273891126	0.0609058	0.426441	G	C	0.0110865	G	major	0.988914
all_trials_avg_SpkWt_g	S14_76804610	14	76804610	-0.000429593	0.000351819	C	T	0.233925	C	major	0.766075
all_trials_avg_SpkWt_g	S14_159035766	14	159035766	-0.072429	0.645514	C	T	0.0121951	C	major	0.987805
all_trials_avg_SpkWt_g	S14_224203729	14	224203729	-0.0922996	1.38194	A	G	0.0155211	A	major	0.984479
all_trials_avg_SpkWt_g	S14_234445278	14	234445278	-0.0155903	0.604162	G	A	0.372506	A	minor	0.372506
all_trials_avg_SpkWt_g	S14_326710436	14	326710436	-0.0554598	1.95206	G	A	0.0620843	A	minor	0.0620843
all_trials_avg_SpkWt_g	S14_496475519	14	496475519	0.0258632	0.0800865	C	A	0.0110865	C	major	0.988914
all_trials_avg_SpkWt_g	S15_349866048	15	349866048	-0.0264293	0.312031	G	C	0.104213	C	minor	0.104213
all_trials_avg_SpkWt_g	S15_374356928	15	374356928	0.0108542	0.0198053	C	T	0.0155211	T	minor	0.0155211
all_trials_avg_SpkWt_g	S15_387961489	15	387961489	0.00768103	0.00426818	G	A	0.00665188	G	major	0.993348
all_trials_avg_SpkWt_g	S15_412358042	15	412358042	0.0156329	0.517316	T	G	0.282705	T	major	0.717295
all_trials_avg_SpkWt_g	S15_566727557	15	566727557	-0.0789073	0.624443	A	C	0.00997783	A	major	0.990022
all_trials_avg_SpkWt_g	S15_582877307	15	582877307	0.0287191	0.391543	T	G	0.0487805	T	major	0.95122
all_trials_avg_SpkWt_g	S15_600918584	15	600918584	-0.0199984	0.809041	C	T	0.25388	C	major	0.74612
all_trials_avg_SpkWt_g	S16_31792648	16	31792648	0.00162524	0.000486405	T	C	0.018847	T	major	0.981153
all_trials_avg_SpkWt_g	S16_229832414	16	229832414	-0.00113645	0.00041234	G	A	0.0731707	A	minor	0.0731707
all_trials_avg_SpkWt_g	S16_242132329	16	242132329	-0.010311	0.26573	C	G	0.480044	C	major	0.519956
all_trials_avg_SpkWt_g	S16_263001852	16	263001852	0.0199898	0.352549	G	A	0.094235	G	major	0.905765
all_trials_avg_SpkWt_g	S16_296781475	16	296781475	-0.0435543	0.777212	G	A	0.0986696	A	minor	0.0986696
all_trials_avg_SpkWt_g	S16_336657077	16	336657077	0.0115889	0.34688	T	A	0.411308	T	major	0.588692
all_trials_avg_SpkWt_g	S16_336657091	16	336657091	-0.0115541	0.266334	A	C	0.247228	A	major	0.752772
all_trials_avg_SpkWt_g	S16_399342247	16	399342247	-0.082383	0.954565	C	T	0.0133038	C	major	0.986696
all_trials_avg_SpkWt_g	S17_108653775	17	108653775	0.0504041	1.06474	T	C	0.0964523	T	major	0.903548
all_trials_avg_SpkWt_g	S17_108653809	17	108653809	-0.0528185	1.16061	C	T	0.0953437	C	major	0.904656
all_trials_avg_SpkWt_g	S17_239233309	17	239233309	-0.0323201	0.440515	C	T	0.103104	C	major	0.896896
all_trials_avg_SpkWt_g	S17_286648169	17	286648169	0.0130745	0.0197066	T	C	0.0110865	T	major	0.988914
all_trials_avg_SpkWt_g	S18_31933921	18	31933921	-0.0412596	0.681493	C	T	0.037694	C	major	0.962306
all_trials_avg_SpkWt_g	S18_62374700	18	62374700	0.0259751	0.24129	G	A	0.0343681	G	major	0.965632
all_trials_avg_SpkWt_g	S18_75576716	18	75576716	0.0460945	0.415459	T	C	0.0199557	T	major	0.980044
all_trials_avg_SpkWt_g	S18_112460873	18	112460873	-0.0147408	0.0648943	G	A	0.0609756	A	minor	0.0609756
all_trials_avg_SpkWt_g	S18_182594987	18	182594987	0.00221996	0.00191602	G	T	0.0842572	T	minor	0.0842572
all_trials_avg_SpkWt_g	S18_412960071	18	412960071	0.00204063	0.00177516	A	G	0.0964523	G	minor	0.0964523
all_trials_avg_SpkWt_g	S18_426508862	18	426508862	-0.0431266	0.126671	G	T	0.00665188	G	major	0.993348
all_trials_avg_SpkWt_g	S18_482517030	18	482517030	-0.0172647	0.0903219	G	A	0.0620843	A	minor	0.0620843
all_trials_avg_SpkWt_g	S18_545444320	18	545444320	-0.0134525	0.0618079	G	A	0.0764967	A	minor	0.0764967
all_trials_avg_SpkWt_g	S19_70012848	19	70012848	-0.0348709	0.391702	G	A	0.0676275	A	minor	0.0676275
all_trials_avg_SpkWt_g	S19_124074654	19	124074654	0.0345745	2.19375	G	A	0.221729	G	major	0.778271
all_trials_avg_SpkWt_g	S19_543224680	19	543224680	0.0451199	0.390823	A	C	0.018847	C	minor	0.018847
all_trials_avg_SpkWt_g	S19_551502245	19	551502245	-0.0430157	0.05565	C	A	0.00332594	A	minor	0.00332594
all_trials_avg_SpkWt_g	S19_634869001	19	634869001	-0.00625995	0.0923231	T	C	0.333703	C	minor	0.333703
all_trials_avg_SpkWt_g	S19_677800667	19	677800667	0.0405835	0.786032	T	A	0.0964523	T	major	0.903548
all_trials_avg_SpkWt_g	S19_692361944	19	692361944	0.028131	0.374863	G	T	0.0920177	T	minor	0.0920177
all_trials_avg_SpkWt_g	S19_736363601	19	736363601	0.0129574	0.340636	C	G	0.344789	G	minor	0.344789
all_trials_avg_SpkWt_g	S20_35656076	20	35656076	-0.0138477	0.314209	G	T	0.194013	G	major	0.805987
all_trials_avg_SpkWt_g	S20_89189834	20	89189834	0.0121315	0.0148513	A	G	0.00997783	G	minor	0.00997783
all_trials_avg_SpkWt_g	S20_148333930	20	148333930	0.0121194	0.0603794	C	A	0.0909091	C	major	0.909091
all_trials_avg_SpkWt_g	S20_158929692	20	158929692	0.0602969	0.265486	A	G	0.00665188	G	minor	0.00665188
all_trials_avg_SpkWt_g	S20_339143703	20	339143703	0.0181544	0.150187	G	A	0.104213	G	major	0.895787
all_trials_avg_SpkWt_g	S20_404723936	20	404723936	-0.0234883	0.0403464	A	T	0.00665188	A	major	0.993348
all_trials_avg_SpkWt_g	S20_405356717	20	405356717	0.00611476	0.0988937	T	A	0.464523	T	major	0.535477
all_trials_avg_SpkWt_g	S20_488953056	20	488953056	-0.0940056	1.51048	C	G	0.0166297	C	major	0.98337
all_trials_avg_SpkWt_g	S20_580880025	20	580880025	0.0640193	0.483571	A	G	0.0110865	G	minor	0.0110865
all_trials_avg_SpkWt_g	S20_603356555	20	603356555	-0.00317632	0.00283155	A	C	0.0277162	A	major	0.972284
all_trials_avg_SpkWt_g	S21_66129792	21	66129792	-0.0104789	0.0102755	C	G	0.00886918	C	major	0.991131
all_trials_avg_SpkWt_g	S21_86037764	21	86037764	0.0232331	0.649487	T	C	0.13082	T	major	0.86918
all_trials_avg_SpkWt_g	S21_90650201	21	90650201	0.0105267	0.280161	T	C	0.378049	T	major	0.621951
all_trials_avg_SpkWt_g	S21_90762051	21	90762051	0.107453	0.602064	T	C	0.00554324	T	major	0.994457
all_trials_avg_SpkWt_g	S21_118538093	21	118538093	0.000706143	7.08798e-05	G	A	0.0133038	G	major	0.986696
all_trials_avg_SpkWt_g	S21_187878445	21	187878445	0.024569	0.032052	T	A	0.00554324	T	major	0.994457
all_trials_avg_SpkWt_g	S21_202424506	21	202424506	0.0564165	0.17251	G	A	0.00554324	G	major	0.994457
all_trials_avg_SpkWt_g	S21_411630228	21	411630228	-0.134193	0.834269	C	T	0.00443459	C	major	0.995565
all_trials_avg_SpkWt_g	S21_440793454	21	440793454	-0.263142	1.67416	C	T	0.0022173	C	major	0.997783
all_trials_avg_TKW_g	S01_29528910	1	29528910	0.22929	0.5732	G	A	0.0365854	G	major	0.963415
all_trials_avg_TKW_g	S01_425640986	1	425640986	0.0607811	0.00610866	C	G	0.00554324	G	minor	0.00554324
all_trials_avg_TKW_g	S01_440284589	1	440284589	0.725826	1.18785	G	C	0.00776053	G	major	0.992239
all_trials_avg_TKW_g	S01_441127557	1	441127557	0.714902	0.740852	G	C	0.00443459	G	major	0.995565
all_trials_avg_TKW_g	S01_448040019	1	448040019	0.161579	0.33237	G	A	0.0388027	G	major	0.961197
all_trials_avg_TKW_g	S02_21200739	2	21200739	-0.324973	0.254789	C	T	0.00776053	C	major	0.992239
all_trials_avg_TKW_g	S02_86294469	2	86294469	0.0789539	0.420592	A	G	0.332594	G	minor	0.332594
all_trials_avg_TKW_g	S02_110750907	2	110750907	-0.116435	0.900997	C	T	0.329268	C	major	0.670732
all_trials_avg_TKW_g	S02_120531680	2	120531680	0.0266976	0.006741	A	T	0.0676275	T	minor	0.0676275
all_trials_avg_TKW_g	S02_132955695	2	132955695	-0.119645	0.0644682	A	G	0.0144124	A	major	0.985588
all_trials_avg_TKW_g	S02_143430838	2	143430838	-0.574552	2.81943	C	T	0.0643016	C	major	0.935698
all_trials_avg_TKW_g	S02_163841443	2	163841443	0.345716	1.48031	A	G	0.094235	G	minor	0.094235
all_trials_avg_TKW_g	S02_280450209	2	280450209	0.652151	0.951088	G	A	0.00665188	G	major	0.993348
all_trials_avg_TKW_g	S02_327466245	2	327466245	0.543205	0.875165	C	T	0.00886918	T	minor	0.00886918
all_trials_avg_TKW_g	S02_403257803	2	403257803	0.246059	0.660615	T	G	0.0831486	T	major	0.916851
all_trials_avg_TKW_g	S03_58073504	3	58073504	0.194205	2.33125	G	A	0.338137	G	major	0.661863
all_trials_avg_TKW_g	S03_290939373	3	290939373	0.264714	0.442603	G	A	0.0199557	G	major	0.980044
all_trials_avg_TKW_g	S03_337625064	3	337625064	-0.189495	2.65442	T	G	0.431264	G	minor	0.431264
all_trials_avg_TKW_g	S03_354805182	3	354805182	-0.459619	2.33538	C	A	0.0332594	A	minor	0.0332594
all_trials_avg_TKW_g	S03_407190205	3	407190205	0.308161	1.25843	A	G	0.104213	G	minor	0.104213
all_trials_avg_TKW_g	S03_431611782	3	431611782	0.161606	0.0781034	T	A	0.00886918	T	major	0.991131
all_trials_avg_TKW_g	S03_477602723	3	477602723	0.0948901	0.0575152	A	C	0.0210643	C	minor	0.0210643
all_trials_avg_TKW_g	S04_5654320	4	5654320	-0.202105	3.17268	G	C	0.435698	C	minor	0.435698
all_trials_avg_TKW_g	S04_31032972	4	31032972	0.248761	0.271744	G	A	0.0144124	G	major	0.985588
all_trials_avg_TKW_g	S04_35525008	4	35525008	0.304472	0.587588	C	A	0.0210643	C	major	0.978936
all_trials_avg_TKW_g	S04_48117627	4	48117627	-0.0222029	0.0202464	A	G	0.161863	A	major	0.838137
all_trials_avg_TKW_g	S04_99870528	4	99870528	-1.40259	2.90395	C	T	0.00443459	C	major	0.995565
all_trials_avg_TKW_g	S04_103131373	4	103131373	0.455563	1.30964	T	A	0.0210643	T	major	0.978936
all_trials_avg_TKW_g	S04_119394068	4	119394068	-0.410636	1.44583	A	C	0.0277162	A	major	0.972284
all_trials_avg_TKW_g	S04_137847829	4	137847829	0.352046	0.762557	T	C	0.0210643	T	major	0.978936
all_trials_avg_TKW_g	S04_199697392	4	199697392	-1.32057	2.71753	G	T	0.00554324	G	major	0.994457
all_trials_avg_TKW_g	S04_220130053	4	220130053	0.869958	2.39972	G	A	0.0121951	G	major	0.987805
all_trials_avg_TKW_g	S04_239757520	4	239757520	0.319402	1.23501	G	A	0.094235	G	major	0.905765
all_trials_avg_TKW_g	S04_261858888	4	261858888	-0.44967	2.80708	G	A	0.103104	A	minor	0.103104
all_trials_avg_TKW_g	S05_57840749	5	57840749	0.106425	0.0418807	T	C	0.0121951	T	major	0.987805
all_trials_avg_TKW_g	S05_366528709	5	366528709	0.184187	2.3991	A	G	0.455654	G	minor	0.455654
all_trials_avg_TKW_g	S05_397289341	5	397289341	1.80067	2.35009	G	A	0.0022173	G	major	0.997783
all_trials_avg_TKW_g	S06_27073124	6	27073124	-0.526591	1.01276	C	T	0.0121951	C	major	0.987805
all_trials_avg_TKW_g	S06_30049280	6	30049280	-0.419161	2.2217	A	C	0.101996	A	major	0.898004
all_trials_avg_TKW_g	S06_166357566	6	166357566	1.17576	2.24996	G	A	0.00554324	G	major	0.994457
all_trials_avg_TKW_g	S06_347530512	6	347530512	0.44793	0.801766	G	A	0.0121951	G	major	0.987805
all_trials_avg_TKW_g	S06_373070997	6	373070997	-0.0786152	0.0440048	G	A	0.0221729	A	minor	0.0221729
all_trials_avg_TKW_g	S06_480699953	6	480699953	-1.16618	3.03751	A	T	0.00665188	A	major	0.993348
all_trials_avg_TKW_g	S06_510179340	6	510179340	0.142475	1.42662	A	G	0.455654	G	minor	0.455654
all_trials_avg_TKW_g	S06_518578819	6	518578819	0.0625434	0.273055	C	G	0.422395	G	minor	0.422395
all_trials_avg_TKW_g	S06_568793265	6	568793265	-0.209088	3.32616	G	A	0.424612	A	minor	0.424612
all_trials_avg_TKW_g	S07_12079084	7	12079084	0.220307	0.923015	A	G	0.0654102	G	minor	0.0654102
all_trials_avg_TKW_g	S07_91555077	7	91555077	-0.735486	2.38727	C	T	0.0144124	C	major	0.985588
all_trials_avg_TKW_g	S07_103055343	7	103055343	-0.0180117	0.00313496	C	G	0.0687361	C	major	0.931264
all_trials_avg_TKW_g	S07_156597465	7	156597465	0.233535	0.172056	C	T	0.00997783	T	minor	0.00997783
all_trials_avg_TKW_g	S07_226848353	7	226848353	-0.0393709	0.0158246	G	A	0.0742794	A	minor	0.0742794
all_trials_avg_TKW_g	S07_516499740	7	516499740	0.00620129	0.00288012	A	G	0.440133	G	minor	0.440133
all_trials_avg_TKW_g	S08_67484386	8	67484386	0.249445	0.281716	A	G	0.0144124	G	minor	0.0144124
all_trials_avg_TKW_g	S08_121556108	8	121556108	0.580374	4.3036	C	T	0.0986696	T	minor	0.0986696
all_trials_avg_TKW_g	S08_197291732	8	197291732	-0.380506	1.53026	C	T	0.0731707	C	major	0.926829
all_trials_avg_TKW_g	S08_324506204	8	324506204	-0.293016	1.02453	A	G	0.0898004	A	major	0.9102
all_trials_avg_TKW_g	S08_425968180	8	425968180	0.143606	1.45869	C	G	0.371397	G	minor	0.371397
all_trials_avg_TKW_g	S09_61869885	9	61869885	-0.261646	2.30401	G	C	0.117517	C	minor	0.117517
all_trials_avg_TKW_g	S09_315677404	9	315677404	0.0495963	0.0292965	C	A	0.0886918	C	major	0.911308
all_trials_avg_TKW_g	S09_385133100	9	385133100	0.0832143	0.264541	G	A	0.140798	G	major	0.859202
all_trials_avg_TKW_g	S09_415851589	9	415851589	0.0243321	0.00640446	C	T	0.0853659	T	minor	0.0853659
all_trials_avg_TKW_g	S10_10944243	10	10944243	-0.0545127	0.0157083	G	A	0.0166297	A	minor	0.0166297
all_trials_avg_TKW_g	S10_62112342	10	62112342	-0.22083	3.43079	T	C	0.365854	C	minor	0.365854
all_trials_avg_TKW_g	S10_120456859	10	120456859	-0.404356	1.49019	G	A	0.059867	A	minor	0.059867
all_trials_avg_TKW_g	S10_447491711	10	447491711	0.0431087	0.0030521	A	G	0.00554324	G	minor	0.00554324
all_trials_avg_TKW_g	S10_459839942	10	459839942	0.000692638	4.24633e-06	G	T	0.0609756	T	minor	0.0609756
all_trials_avg_TKW_g	S10_463199055	10	463199055	-0.172919	0.0227704	A	C	0.0022173	A	major	0.997783
all_trials_avg_TKW_g	S11_6019252	11	6019252	-0.12923	1.2132	G	A	0.471175	A	minor	0.471175
all_trials_avg_TKW_g	S11_52972239	11	52972239	-0.648163	3.15997	C	G	0.0254989	C	major	0.974501
all_trials_avg_TKW_g	S11_59775443	11	59775443	-0.378657	2.58892	C	T	0.0609756	C	major	0.939024
all_trials_avg_TKW_g	S11_161626009	11	161626009	-1.32013	2.65714	A	G	0.00554324	A	major	0.994457
all_trials_avg_TKW_g	S11_191637589	11	191637589	0.274666	0.0705581	T	C	0.00332594	T	major	0.996674
all_trials_avg_TKW_g	S11_211702566	11	211702566	-0.0559396	0.0173152	C	A	0.0210643	A	minor	0.0210643
all_trials_avg_TKW_g	S11_227848416	11	227848416	0.259175	0.101692	G	A	0.00443459	G	major	0.995565
all_trials_avg_TKW_g	S11_235603452	11	235603452	-0.162291	1.93132	G	A	0.491131	A	minor	0.491131
all_trials_avg_TKW_g	S11_241092955	11	241092955	-0.193451	2.73445	T	A	0.411308	A	minor	0.411308
all_trials_avg_TKW_g	S12_25712846	12	25712846	0.0189059	0.0231138	C	T	0.284922	T	minor	0.284922
all_trials_avg_TKW_g	S12_87898328	12	87898328	-0.445818	2.12711	A	G	0.0798226	A	major	0.920177
all_trials_avg_TKW_g	S13_9159276	13	9159276	-0.3291	0.181101	G	A	0.00554324	A	minor	0.00554324
all_trials_avg_TKW_g	S13_9595560	13	9595560	0.443699	0.422272	C	T	0.00665188	T	minor	0.00665188
all_trials_avg_TKW_g	S13_17051098	13	17051098	-0.274271	2.21236	A	G	0.109756	A	major	0.890244
all_trials_avg_TKW_g	S13_29748874	13	29748874	0.550908	1.57478	G	A	0.018847	G	major	0.981153
all_trials_avg_TKW_g	S13_51976779	13	51976779	-0.0902044	0.623724	T	A	0.488914	A	minor	0.488914
all_trials_avg_TKW_g	S13_58962015	13	58962015	0.059982	0.0235787	G	A	0.0210643	G	major	0.978936
all_trials_avg_TKW_g	S13_134782913	13	134782913	-1.11672	2.79009	C	T	0.00776053	C	major	0.992239
all_trials_avg_TKW_g	S13_135391210	13	135391210	-0.768669	2.14446	C	T	0.0121951	C	major	0.987805
all_trials_avg_TKW_g	S13_209539816	13	209539816	-0.593312	2.29163	C	G	0.0210643	C	major	0.978936
all_trials_avg_TKW_g	S13_222536639	13	222536639	0.855255	2.202	G	A	0.00997783	G	major	0.990022
all_trials_avg_TKW_g	S13_245158348	13	245158348	0.673103	2.61385	G	C	0.018847	G	major	0.981153
all_trials_avg_TKW_g	S13_248290754	13	248290754	0.150544	0.887585	A	G	0.145233	G	minor	0.145233
all_trials_avg_TKW_g	S13_252462690	13	252462690	-0.108129	0.619951	G	C	0.2051	C	minor	0.2051
all_trials_avg_TKW_g	S13_265039502	13	265039502	0.433467	0.447389	A	G	0.00776053	G	minor	0.00776053
all_trials_avg_TKW_g	S13_273891126	13	273891126	0.649403	1.45837	G	C	0.0110865	G	major	0.988914
all_trials_avg_TKW_g	S14_76804610	14	76804610	0.0832146	0.395028	C	T	0.233925	T	minor	0.233925
all_trials_avg_TKW_g	S14_159035766	14	159035766	-0.15647	0.0911739	C	T	0.0121951	C	major	0.987805
all_trials_avg_TKW_g	S14_224203729	14	224203729	-0.268457	0.354217	A	G	0.0155211	A	major	0.984479
all_trials_avg_TKW_g	S14_234445278	14	234445278	-0.140338	1.44113	G	A	0.372506	A	minor	0.372506
all_trials_avg_TKW_g	S14_326710436	14	326710436	-0.372064	2.66372	G	A	0.0620843	A	minor	0.0620843
all_trials_avg_TKW_g	S14_496475519	14	496475519	-0.0722102	0.0189697	C	A	0.0110865	A	minor	0.0110865
all_trials_avg_TKW_g	S15_349866048	15	349866048	0.113248	0.170603	G	C	0.104213	G	major	0.895787
all_trials_avg_TKW_g	S15_374356928	15	374356928	0.525131	1.42054	C	T	0.0155211	T	minor	0.0155211
all_trials_avg_TKW_g	S15_387961489	15	387961489	-0.757134	1.25962	G	A	0.00665188	A	minor	0.00665188
all_trials_avg_TKW_g	S15_412358042	15	412358042	0.216205	2.87886	T	G	0.282705	T	major	0.717295
all_trials_avg_TKW_g	S15_566727557	15	566727557	-0.874754	2.32798	A	C	0.00997783	A	major	0.990022
all_trials_avg_TKW_g	S15_582877307	15	582877307	0.0288824	0.0119111	T	G	0.0487805	T	major	0.95122
all_trials_avg_TKW_g	S15_600918584	15	600918584	-0.0337355	0.0684552	C	T	0.25388	C	major	0.74612
all_trials_avg_TKW_g	S16_31792648	16	31792648	0.622355	2.16027	T	C	0.018847	T	major	0.981153
all_trials_avg_TKW_g	S16_229832414	16	229832414	-0.44772	1.91062	G	A	0.0731707	A	minor	0.0731707
all_trials_avg_TKW_g	S16_242132329	16	242132329	-0.00736327	0.00378444	C	G	0.480044	C	major	0.519956
all_trials_avg_TKW_g	S16_263001852	16	263001852	0.409543	4.42676	G	A	0.094235	G	major	0.905765
all_trials_avg_TKW_g	S16_296781475	16	296781475	0.155705	0.281853	G	A	0.0986696	G	major	0.90133
all_trials_avg_TKW_g	S16_336657077	16	336657077	0.17009	2.23471	T	A	0.411308	T	major	0.588692
all_trials_avg_TKW_g	S16_336657091	16	336657091	-0.141057	1.17892	A	C	0.247228	A	major	0.752772
all_trials_avg_TKW_g	S16_399342247	16	399342247	0.129651	0.0705543	C	T	0.0133038	T	minor	0.0133038
all_trials_avg_TKW_g	S17_108653775	17	108653775	0.436949	2.3459	T	C	0.0964523	T	major	0.903548
all_trials_avg_TKW_g	S17_108653809	17	108653809	-0.381913	1.77822	C	T	0.0953437	C	major	0.904656
all_trials_avg_TKW_g	S17_239233309	17	239233309	-0.427636	2.22634	C	T	0.103104	C	major	0.896896
all_trials_avg_TKW_g	S17_286648169	17	286648169	0.592518	1.2066	T	C	0.0110865	T	major	0.988914
all_trials_avg_TKW_g	S18_31933921	18	31933921	-0.204013	0.516203	C	T	0.037694	C	major	0.962306
all_trials_avg_TKW_g	S18_62374700	18	62374700	0.46995	2.3948	G	A	0.0343681	G	major	0.965632
all_trials_avg_TKW_g	S18_75576716	18	75576716	0.723523	3.00752	T	C	0.0199557	T	major	0.980044
all_trials_avg_TKW_g	S18_112460873	18	112460873	-0.492752	2.17138	G	A	0.0609756	A	minor	0.0609756
all_trials_avg_TKW_g	S18_182594987	18	182594987	-0.408539	1.94095	G	T	0.0842572	G	major	0.915743
all_trials_avg_TKW_g	S18_412960071	18	412960071	-0.502511	3.16756	A	G	0.0964523	A	major	0.903548
all_trials_avg_TKW_g	S18_426508862	18	426508862	-1.04407	2.15557	G	T	0.00665188	G	major	0.993348
all_trials_avg_TKW_g	S18_482517030	18	482517030	-0.509773	2.32866	G	A	0.0620843	A	minor	0.0620843
all_trials_avg_TKW_g	S18_545444320	18	545444320	-0.447336	2.0253	G	A	0.0764967	A	minor	0.0764967
all_trials_avg_TKW_g	S19_70012848	19	70012848	0.17723	0.300258	G	A	0.0676275	G	major	0.932373
all_trials_avg_TKW_g	S19_124074654	19	124074654	0.21394	2.47341	G	A	0.221729	G	major	0.778271
all_trials_avg_TKW_g	S19_543224680	19	543224680	-0.129894	0.0983417	A	C	0.018847	A	major	0.981153
all_trials_avg_TKW_g	S19_551502245	19	551502245	0.0437241	0.0017536	C	A	0.00332594	C	major	0.996674
all_trials_avg_TKW_g	S19_634869001	19	634869001	0.0818947	0.462909	T	C	0.333703	T	major	0.666297
all_trials_avg_TKW_g	S19_677800667	19	677800667	-0.440112	2.74111	T	A	0.0964523	A	minor	0.0964523
all_trials_avg_TKW_g	S19_692361944	19	692361944	0.336959	1.61252	G	T	0.0920177	T	minor	0.0920177
all_trials_avg_TKW_g	S19_736363601	19	736363601	-0.0221312	0.0301263	C	G	0.344789	C	major	0.655211
all_trials_avg_TKW_g	S20_35656076	20	35656076	-0.209663	2.12179	G	T	0.194013	G	major	0.805987
all_trials_avg_TKW_g	S20_89189834	20	89189834	0.462483	0.652735	A	G	0.00997783	G	minor	0.00997783
all_trials_avg_TKW_g	S20_148333930	20	148333930	-0.237435	0.697528	C	A	0.0909091	A	minor	0.0909091
all_trials_avg_TKW_g	S20_158929692	20	158929692	0.53513	0.643791	A	G	0.00665188	G	minor	0.00665188
all_trials_avg_TKW_g	S20_339143703	20	339143703	0.330938	1.49062	G	A	0.104213	G	major	0.895787
all_trials_avg_TKW_g	S20_404723936	20	404723936	0.283901	0.181518	A	T	0.00665188	T	minor	0.00665188
all_trials_avg_TKW_g	S20_405356717	20	405356717	-0.167195	2.21059	T	A	0.464523	A	minor	0.464523
all_trials_avg_TKW_g	S20_488953056	20	488953056	-0.144731	0.108161	C	G	0.0166297	C	major	0.98337
all_trials_avg_TKW_g	S20_580880025	20	580880025	0.0600148	0.0129727	A	G	0.0110865	G	minor	0.0110865
all_trials_avg_TKW_g	S20_603356555	20	603356555	-0.525868	2.31398	A	C	0.0277162	A	major	0.972284
all_trials_avg_TKW_g	S21_66129792	21	66129792	0.277351	0.219526	C	G	0.00886918	G	minor	0.00886918
all_trials_avg_TKW_g	S21_86037764	21	86037764	0.270246	2.57936	T	C	0.13082	T	major	0.86918
all_trials_avg_TKW_g	S21_90650201	21	90650201	0.146184	1.61006	T	C	0.378049	T	major	0.621951
all_trials_avg_TKW_g	S21_90762051	21	90762051	1.32013	2.65714	T	C	0.00554324	T	major	0.994457
all_trials_avg_TKW_g	S21_118538093	21	118538093	0.322509	0.442834	G	A	0.0133038	G	major	0.986696
all_trials_avg_TKW_g	S21_187878445	21	187878445	-0.225689	0.0804355	T	A	0.00554324	A	minor	0.00554324
all_trials_avg_TKW_g	S21_202424506	21	202424506	-0.405705	0.271537	G	A	0.00554324	A	minor	0.00554324
all_trials_avg_TKW_g	S21_411630228	21	411630228	-1.4005	2.67292	C	T	0.00443459	C	major	0.995565
all_trials_avg_TKW_g	S21_440793454	21	440793454	-1.16855	0.99897	C	T	0.0022173	C	major	0.997783
all_trials_avg_Yield_g	S01_29528910	1	29528910	4.1083	1.24953	G	A	0.0365854	G	major	0.963415
all_trials_avg_Yield_g	S01_425640986	1	425640986	18.0956	3.51775	C	G	0.00554324	G	minor	0.00554324
all_trials_avg_Yield_g	S01_440284589	1	440284589	8.23498	1.03383	G	C	0.00776053	G	major	0.992239
all_trials_avg_Yield_g	S01_441127557	1	441127557	7.24356	0.499972	G	C	0.00443459	G	major	0.995565
all_trials_avg_Yield_g	S01_448040019	1	448040019	-3.35996	0.915039	G	A	0.0388027	A	minor	0.0388027
all_trials_avg_Yield_g	S02_21200739	2	21200739	-5.23567	0.428293	C	T	0.00776053	C	major	0.992239
all_trials_avg_Yield_g	S02_86294469	2	86294469	-0.259023	0.0313609	A	G	0.332594	A	major	0.667406
all_trials_avg_Yield_g	S02_110750907	2	110750907	-1.25376	0.720679	C	T	0.329268	C	major	0.670732
all_trials_avg_Yield_g	S02_120531680	2	120531680	-3.01783	0.576292	A	T	0.0676275	A	major	0.932373
all_trials_avg_Yield_g	S02_132955695	2	132955695	9.46992	2.65342	A	G	0.0144124	G	minor	0.0144124
all_trials_avg_Yield_g	S02_143430838	2	143430838	-1.32072	0.100616	C	T	0.0643016	C	major	0.935698
all_trials_avg_Yield_g	S02_163841443	2	163841443	2.47484	0.513872	A	G	0.094235	G	minor	0.094235
all_trials_avg_Yield_g	S02_280450209	2	280450209	13.1118	2.48505	G	A	0.00665188	G	major	0.993348
all_trials_avg_Yield_g	S02_327466245	2	327466245	3.7979	0.277349	C	T	0.00886918	T	minor	0.00886918
all_trials_avg_Yield_g	S02_403257803	2	403257803	1.55599	0.179317	T	G	0.0831486	T	major	0.916851
all_trials_avg_Yield_g	S03_58073504	3	58073504	-0.0553056	0.0012947	G	A	0.338137	A	minor	0.338137
all_trials_avg_Yield_g	S03_290939373	3	290939373	8.18032	2.80708	G	A	0.0199557	G	major	0.980044
all_trials_avg_Yield_g	S03_337625064	3	337625064	-1.03005	0.534454	T	G	0.431264	G	minor	0.431264
all_trials_avg_Yield_g	S03_354805182	3	354805182	0.377794	0.0101134	C	A	0.0332594	C	major	0.966741
all_trials_avg_Yield_g	S03_407190205	3	407190205	1.81807	0.293873	A	G	0.104213	G	minor	0.104213
all_trials_avg_Yield_g	S03_431611782	3	431611782	2.85523	0.156715	T	A	0.00886918	T	major	0.991131
all_trials_avg_Yield_g	S03_477602723	3	477602723	8.10433	2.76435	A	C	0.0210643	C	minor	0.0210643
all_trials_avg_Yield_g	S04_5654320	4	5654320	0.481754	0.121876	G	C	0.435698	G	major	0.564302
all_trials_avg_Yield_g	S04_31032972	4	31032972	-5.20029	0.79373	G	A	0.0144124	A	minor	0.0144124
all_trials_avg_Yield_g	S04_35525008	4	35525008	-1.52506	0.0996119	C	A	0.0210643	A	minor	0.0210643
all_trials_avg_Yield_g	S04_48117627	4	48117627	1.4807	0.622259	A	G	0.161863	G	minor	0.161863
all_trials_avg_Yield_g	S04_99870528	4	99870528	-8.84599	0.748048	C	T	0.00443459	C	major	0.995565
all_trials_avg_Yield_g	S04_103131373	4	103131373	-2.29277	0.224176	T	A	0.0210643	A	minor	0.0210643
all_trials_avg_Yield_g	S04_119394068	4	119394068	-3.97414	0.900178	A	C	0.0277162	A	major	0.972284
all_trials_avg_Yield_g	S04_137847829	4	137847829	-3.61437	0.550402	T	C	0.0210643	C	minor	0.0210643
all_trials_avg_Yield_g	S04_199697392	4	199697392	-3.30638	0.114764	G	T	0.00554324	G	major	0.994457
all_trials_avg_Yield_g	S04_220130053	4	220130053	-1.41198	0.0433871	G	A	0.0121951	A	minor	0.0121951
all_trials_avg_Yield_g	S04_239757520	4	239757520	-1.29872	0.138345	G	A	0.094235	A	minor	0.094235
all_trials_avg_Yield_g	S04_261858888	4	261858888	0.750599	0.0509517	G	A	0.103104	G	major	0.896896
all_trials_avg_Yield_g	S05_57840749	5	57840749	2.5397	0.159457	T	C	0.0121951	T	major	0.987805
all_trials_avg_Yield_g	S05_366528709	5	366528709	0.666877	0.218214	A	G	0.455654	G	minor	0.455654
all_trials_avg_Yield_g	S05_397289341	5	397289341	10.2376	0.500354	G	A	0.0022173	G	major	0.997783
all_trials_avg_Yield_g	S06_27073124	6	27073124	-1.0537	0.0272557	C	T	0.0121951	C	major	0.987805
all_trials_avg_Yield_g	S06_30049280	6	30049280	4.25687	1.56782	A	C	0.101996	C	minor	0.101996
all_trials_avg_Yield_g	S06_166357566	6	166357566	10.1513	1.10649	G	A	0.00554324	G	major	0.994457
all_trials_avg_Yield_g	S06_347530512	6	347530512	0.923444	0.0216035	G	A	0.0121951	G	major	0.987805
all_trials_avg_Yield_g	S06_373070997	6	373070997	-7.68136	2.76971	G	A	0.0221729	A	minor	0.0221729
all_trials_avg_Yield_g	S06_480699953	6	480699953	-9.44226	1.29046	A	T	0.00665188	A	major	0.993348
all_trials_avg_Yield_g	S06_510179340	6	510179340	0.983546	0.469123	A	G	0.455654	G	minor	0.455654
all_trials_avg_Yield_g	S06_518578819	6	518578819	0.612135	0.18272	C	G	0.422395	G	minor	0.422395
all_trials_avg_Yield_g	S06_568793265	6	568793265	-0.0504422	0.00132213	G	A	0.424612	A	minor	0.424612
all_trials_avg_Yield_g	S07_12079084	7	12079084	-3.59941	1.62431	A	G	0.0654102	A	major	0.93459
all_trials_avg_Yield_g	S07_91555077	7	91555077	-2.31839	0.157442	C	T	0.0144124	C	major	0.985588
all_trials_avg_Yield_g	S07_103055343	7	103055343	1.57853	0.163217	C	G	0.0687361	G	minor	0.0687361
all_trials_avg_Yield_g	S07_156597465	7	156597465	-4.09283	0.340076	C	T	0.00997783	C	major	0.990022
all_trials_avg_Yield_g	S07_226848353	7	226848353	-0.53105	0.0193839	G	A	0.0742794	A	minor	0.0742794
all_trials_avg_Yield_g	S07_516499740	7	516499740	-0.801002	0.32074	A	G	0.440133	A	major	0.559867
all_trials_avg_Yield_g	S08_67484386	8	67484386	3.90724	0.452001	A	G	0.0144124	G	minor	0.0144124
all_trials_avg_Yield_g	S08_121556108	8	121556108	-1.32436	0.151288	C	T	0.0986696	C	major	0.90133
all_trials_avg_Yield_g	S08_197291732	8	197291732	0.821019	0.0469929	C	T	0.0731707	T	minor	0.0731707
all_trials_avg_Yield_g	S08_324506204	8	324506204	-0.414163	0.0137727	A	G	0.0898004	A	major	0.9102
all_trials_avg_Yield_g	S08_425968180	8	425968180	-0.801118	0.310057	C	G	0.371397	C	major	0.628603
all_trials_avg_Yield_g	S09_61869885	9	61869885	-1.32154	0.391003	G	C	0.117517	C	minor	0.117517
all_trials_avg_Yield_g	S09_315677404	9	315677404	-3.72081	1.11215	C	A	0.0886918	A	minor	0.0886918
all_trials_avg_Yield_g	S09_385133100	9	385133100	0.922895	0.219735	G	A	0.140798	G	major	0.859202
all_trials_avg_Yield_g	S09_415851589	9	415851589	5.96549	2.58768	C	T	0.0853659	T	minor	0.0853659
all_trials_avg_Yield_g	S10_10944243	10	10944243	-1.65609	0.0943711	G	A	0.0166297	A	minor	0.0166297
all_trials_avg_Yield_g	S10_62112342	10	62112342	0.000615164	1.80821e-07	T	C	0.365854	T	major	0.634146
all_trials_avg_Yield_g	S10_120456859	10	120456859	2.17221	0.281701	G	A	0.059867	G	major	0.940133
all_trials_avg_Yield_g	S10_447491711	10	447491711	-0.833661	0.00748408	A	G	0.00554324	A	major	0.994457
all_trials_avg_Yield_g	S10_459839942	10	459839942	-1.39545	0.115269	G	T	0.0609756	G	major	0.939024
all_trials_avg_Yield_g	S10_463199055	10	463199055	-5.74768	0.161106	A	C	0.0022173	A	major	0.997783
all_trials_avg_Yield_g	S11_6019252	11	6019252	0.884307	0.401663	G	A	0.471175	G	major	0.528825
all_trials_avg_Yield_g	S11_52972239	11	52972239	0.216979	0.00239107	C	G	0.0254989	G	minor	0.0254989
all_trials_avg_Yield_g	S11_59775443	11	59775443	-2.29174	0.633175	C	T	0.0609756	C	major	0.939024
all_trials_avg_Yield_g	S11_161626009	11	161626009	-8.55741	0.76517	A	G	0.00554324	A	major	0.994457
all_trials_avg_Yield_g	S11_191637589	11	191637589	0.244511	0.00036094	T	C	0.00332594	T	major	0.996674
all_trials_avg_Yield_g	S11_211702566	11	211702566	6.36068	1.45186	C	A	0.0210643	C	major	0.978936
all_trials_avg_Yield_g	S11_227848416	11	227848416	3.76077	0.137289	G	A	0.00443459	G	major	0.995565
all_trials_avg_Yield_g	S11_235603452	11	235603452	-0.34957	0.0634325	G	A	0.491131	A	minor	0.491131
all_trials_avg_Yield_g	S11_241092955	11	241092955	1.87038	1.77682	T	A	0.411308	T	major	0.588692
all_trials_avg_Yield_g	S12_25712846	12	25712846	-1.22104	0.646519	C	T	0.284922	C	major	0.715078
all_trials_avg_Yield_g	S12_87898328	12	87898328	-0.919258	0.0615959	A	G	0.0798226	A	major	0.920177
all_trials_avg_Yield_g	S13_9159276	13	9159276	3.45073	0.129039	G	A	0.00554324	G	major	0.994457
all_trials_avg_Yield_g	S13_9595560	13	9595560	-1.69541	0.0410049	C	T	0.00665188	C	major	0.993348
all_trials_avg_Yield_g	S13_17051098	13	17051098	0.407593	0.0339283	A	G	0.109756	G	minor	0.109756
all_trials_avg_Yield_g	S13_29748874	13	29748874	0.801684	0.0228093	G	A	0.018847	G	major	0.981153
all_trials_avg_Yield_g	S13_51976779	13	51976779	-1.19874	0.74357	T	A	0.488914	A	minor	0.488914
all_trials_avg_Yield_g	S13_58962015	13	58962015	-7.88654	2.69845	G	A	0.0210643	A	minor	0.0210643
all_trials_avg_Yield_g	S13_134782913	13	134782913	-8.26488	1.03768	C	T	0.00776053	C	major	0.992239
all_trials_avg_Yield_g	S13_135391210	13	135391210	-5.61226	0.772911	C	T	0.0121951	C	major	0.987805
all_trials_avg_Yield_g	S13_209539816	13	209539816	-1.393	0.0840269	C	G	0.0210643	C	major	0.978936
all_trials_avg_Yield_g	S13_222536639	13	222536639	4.0208	0.325134	G	A	0.00997783	G	major	0.990022
all_trials_avg_Yield_g	S13_245158348	13	245158348	3.0373	0.350408	G	C	0.018847	G	major	0.981153
all_trials_avg_Yield_g	S13_248290754	13	248290754	0.683344	0.123646	A	G	0.145233	G	minor	0.145233
all_trials_avg_Yield_g	S13_252462690	13	252462690	-3.1721	3.50957	G	C	0.2051	C	minor	0.2051
all_trials_avg_Yield_g	S13_265039502	13	265039502	3.93532	0.241628	A	G	0.00776053	G	minor	0.00776053
all_trials_avg_Yield_g	S13_273891126	13	273891126	4.09202	0.383809	G	C	0.0110865	G	major	0.988914
all_trials_avg_Yield_g	S14_76804610	14	76804610	-0.543251	0.11222	C	T	0.233925	C	major	0.766075
all_trials_avg_Yield_g	S14_159035766	14	159035766	-7.0322	1.21173	C	T	0.0121951	C	major	0.987805
all_trials_avg_Yield_g	S14_224203729	14	224203729	-9.32777	2.80909	A	G	0.0155211	A	major	0.984479
all_trials_avg_Yield_g	S14_234445278	14	234445278	-0.0846409	0.00356416	G	A	0.372506	A	minor	0.372506
all_trials_avg_Yield_g	S14_326710436	14	326710436	-2.6093	0.860406	G	A	0.0620843	A	minor	0.0620843
all_trials_avg_Yield_g	S14_496475519	14	496475519	-0.832681	0.016524	C	A	0.0110865	A	minor	0.0110865
all_trials_avg_Yield_g	S15_349866048	15	349866048	-4.05768	1.46898	G	C	0.104213	C	minor	0.104213
all_trials_avg_Yield_g	S15_374356928	15	374356928	-2.86422	0.274097	C	T	0.0155211	C	major	0.984479
all_trials_avg_Yield_g	S15_387961489	15	387961489	5.38797	0.417899	G	A	0.00665188	G	major	0.993348
all_trials_avg_Yield_g	S15_412358042	15	412358042	0.867105	0.319259	T	G	0.282705	T	major	0.717295
all_trials_avg_Yield_g	S15_566727557	15	566727557	-2.57703	0.132578	A	C	0.00997783	A	major	0.990022
all_trials_avg_Yield_g	S15_582877307	15	582877307	-0.728815	0.0502975	T	G	0.0487805	G	minor	0.0487805
all_trials_avg_Yield_g	S15_600918584	15	600918584	-2.10927	1.79895	C	T	0.25388	C	major	0.74612
all_trials_avg_Yield_g	S16_31792648	16	31792648	-1.51837	0.08451	T	C	0.018847	C	minor	0.018847
all_trials_avg_Yield_g	S16_229832414	16	229832414	0.0674634	0.000290163	G	A	0.0731707	G	major	0.926829
all_trials_avg_Yield_g	S16_242132329	16	242132329	-0.661518	0.22105	C	G	0.480044	C	major	0.519956
all_trials_avg_Yield_g	S16_263001852	16	263001852	-0.327077	0.0188421	G	A	0.094235	A	minor	0.094235
all_trials_avg_Yield_g	S16_296781475	16	296781475	-1.42747	0.16827	G	A	0.0986696	A	minor	0.0986696
all_trials_avg_Yield_g	S16_336657077	16	336657077	-0.404991	0.084543	T	A	0.411308	A	minor	0.411308
all_trials_avg_Yield_g	S16_336657091	16	336657091	-0.24378	0.023693	A	C	0.247228	A	major	0.752772
all_trials_avg_Yield_g	S16_399342247	16	399342247	-1.15324	0.0373276	C	T	0.0133038	C	major	0.986696
all_trials_avg_Yield_g	S17_108653775	17	108653775	0.669669	0.0376552	T	C	0.0964523	T	major	0.903548
all_trials_avg_Yield_g	S17_108653809	17	108653809	-0.687423	0.0393925	C	T	0.0953437	C	major	0.904656
all_trials_avg_Yield_g	S17_239233309	17	239233309	0.891081	0.0673067	C	T	0.103104	T	minor	0.103104
all_trials_avg_Yield_g	S17_286648169	17	286648169	-2.43073	0.136094	T	C	0.0110865	C	minor	0.0110865
all_trials_avg_Yield_g	S18_31933921	18	31933921	-0.069611	0.000384876	C	T	0.037694	C	major	0.962306
all_trials_avg_Yield_g	S18_62374700	18	62374700	-0.640137	0.0291559	G	A	0.0343681	A	minor	0.0343681
all_trials_avg_Yield_g	S18_75576716	18	75576716	3.13031	0.383706	T	C	0.0199557	T	major	0.980044
all_trials_avg_Yield_g	S18_112460873	18	112460873	1.10853	0.0732857	G	A	0.0609756	G	major	0.939024
all_trials_avg_Yield_g	S18_182594987	18	182594987	2.85685	0.633432	G	T	0.0842572	T	minor	0.0842572
all_trials_avg_Yield_g	S18_412960071	18	412960071	2.00139	0.341876	A	G	0.0964523	G	minor	0.0964523
all_trials_avg_Yield_g	S18_426508862	18	426508862	-1.67752	0.0384648	G	T	0.00665188	G	major	0.993348
all_trials_avg_Yield_g	S18_482517030	18	482517030	4.35857	1.15127	G	A	0.0620843	G	major	0.937916
all_trials_avg_Yield_g	S18_545444320	18	545444320	0.0123005	1.03331e-05	G	A	0.0764967	G	major	0.923503
all_trials_avg_Yield_g	S19_70012848	19	70012848	-0.239731	0.0037028	G	A	0.0676275	A	minor	0.0676275
all_trials_avg_Yield_g	S19_124074654	19	124074654	1.91075	1.34174	G	A	0.221729	G	major	0.778271
all_trials_avg_Yield_g	S19_543224680	19	543224680	-0.423629	0.00685643	A	C	0.018847	A	major	0.981153
all_trials_avg_Yield_g	S19_551502245	19	551502245	1.38436	0.011469	C	A	0.00332594	C	major	0.996674
all_trials_avg_Yield_g	S19_634869001	19	634869001	-0.32422	0.0496182	T	C	0.333703	C	minor	0.333703
all_trials_avg_Yield_g	S19_677800667	19	677800667	1.02392	0.100058	T	A	0.0964523	T	major	0.903548
all_trials_avg_Yield_g	S19_692361944	19	692361944	3.07641	0.894608	G	T	0.0920177	T	minor	0.0920177
all_trials_avg_Yield_g	S19_736363601	19	736363601	-0.127813	0.00660118	C	G	0.344789	C	major	0.655211
all_trials_avg_Yield_g	S20_35656076	20	35656076	0.750565	0.184854	G	T	0.194013	T	minor	0.194013
all_trials_avg_Yield_g	S20_89189834	20	89189834	-4.02135	0.325236	A	G	0.00997783	A	major	0.990022
all_trials_avg_Yield_g	S20_148333930	20	148333930	1.8649	0.285229	C	A	0.0909091	C	major	0.909091
all_trials_avg_Yield_g	S20_158929692	20	158929692	-2.7552	0.110069	A	G	0.00665188	A	major	0.993348
all_trials_avg_Yield_g	S20_339143703	20	339143703	-1.41075	0.181068	G	A	0.104213	A	minor	0.104213
all_trials_avg_Yield_g	S20_404723936	20	404723936	-1.74024	0.0439602	A	T	0.00665188	A	major	0.993348
all_trials_avg_Yield_g	S20_405356717	20	405356717	-0.91421	0.441283	T	A	0.464523	A	minor	0.464523
all_trials_avg_Yield_g	S20_488953056	20	488953056	-5.86103	1.16956	C	G	0.0166297	C	major	0.98337
all_trials_avg_Yield_g	S20_580880025	20	580880025	10.2419	2.46079	A	G	0.0110865	G	minor	0.0110865
all_trials_avg_Yield_g	S20_603356555	20	603356555	-0.240885	0.00325304	A	C	0.0277162	A	major	0.972284
all_trials_avg_Yield_g	S21_66129792	21	66129792	-1.55033	0.0447483	C	G	0.00886918	C	major	0.991131
all_trials_avg_Yield_g	S21_86037764	21	86037764	1.12466	0.30497	T	C	0.13082	T	major	0.86918
all_trials_avg_Yield_g	S21_90650201	21	90650201	0.624258	0.196684	T	C	0.378049	T	major	0.621951
all_trials_avg_Yield_g	S21_90762051	21	90762051	8.55741	0.76517	T	C	0.00554324	T	major	0.994457
all_trials_avg_Yield_g	S21_118538093	21	118538093	-0.207933	0.00122612	G	A	0.0133038	A	minor	0.0133038
all_trials_avg_Yield_g	S21_187878445	21	187878445	2.36824	0.0595115	T	A	0.00554324	T	major	0.994457
all_trials_avg_Yield_g	S21_202424506	21	202424506	6.65222	0.477359	G	A	0.00554324	G	major	0.994457
all_trials_avg_Yield_g	S21_411630228	21	411630228	-10.5426	1.031	C	T	0.00443459	C	major	0.995565
all_trials_avg_Yield_g	S21_440793454	21	440793454	-17.6045	1.49183	C	T	0.0022173	C	major	0.997783
Crk18_SdLen_cm	S01_29528910	1	29528910	0.122331	1.20268	G	A	0.0369955	G	major	0.963004
Crk18_SdLen_cm	S01_425640986	1	425640986	-0.299997	1.09121	C	G	0.00560538	C	major	0.994395
Crk18_SdLen_cm	S01_440284589	1	440284589	0.121386	0.244897	G	C	0.00784753	G	major	0.992152
Crk18_SdLen_cm	S01_441127557	1	441127557	0.145907	0.226665	G	C	0.00448431	G	major	0.995516
Crk18_SdLen_cm	S01_448040019	1	448040019	0.184552	2.99179	G	A	0.0369955	G	major	0.963004
Crk18_SdLen_cm	S02_21200739	2	21200739	-0.164598	0.479195	C	T	0.00784753	C	major	0.992152
Crk18_SdLen_cm	S02_86294469	2	86294469	0.0527245	1.3679	A	G	0.334081	G	minor	0.334081
Crk18_SdLen_cm	S02_110750907	2	110750907	-0.0647021	2.03629	C	T	0.328475	C	major	0.671525
Crk18_SdLen_cm	S02_120531680	2	120531680	-0.204556	2.87058	A	T	0.0672646	A	major	0.932735
Crk18_SdLen_cm	S02_132955695	2	132955695	-0.0993357	0.326283	A	G	0.014574	A	major	0.985426
Crk18_SdLen_cm	S02_143430838	2	143430838	-0.180917	2.0156	C	T	0.0639013	C	major	0.936099
Crk18_SdLen_cm	S02_163841443	2	163841443	0.204783	3.79062	A	G	0.0941704	G	minor	0.0941704
Crk18_SdLen_cm	S02_280450209	2	280450209	0.122159	0.244579	G	A	0.00672646	G	major	0.993274
Crk18_SdLen_cm	S02_327466245	2	327466245	0.163536	0.580908	C	T	0.00896861	T	minor	0.00896861
Crk18_SdLen_cm	S02_403257803	2	403257803	0.0997084	0.797695	T	G	0.0840807	T	major	0.915919
Crk18_SdLen_cm	S03_58073504	3	58073504	0.0232448	0.242557	G	A	0.337444	G	major	0.662556
Crk18_SdLen_cm	S03_290939373	3	290939373	0.0734602	0.250247	G	A	0.0201794	G	major	0.979821
Crk18_SdLen_cm	S03_337625064	3	337625064	-0.0190265	0.195735	T	G	0.433857	G	minor	0.433857
Crk18_SdLen_cm	S03_354805182	3	354805182	-0.0323977	0.084928	C	A	0.0336323	A	minor	0.0336323
Crk18_SdLen_cm	S03_407190205	3	407190205	0.190524	3.5029	A	G	0.10426	G	minor	0.10426
Crk18_SdLen_cm	S03_431611782	3	431611782	0.00954828	0.00199772	T	A	0.00896861	T	major	0.991031
Crk18_SdLen_cm	S03_477602723	3	477602723	-0.0564118	0.149268	A	C	0.0213004	A	major	0.9787
Crk18_SdLen_cm	S04_5654320	4	5654320	-0.0174545	0.172591	G	C	0.431614	C	minor	0.431614
Crk18_SdLen_cm	S04_31032972	4	31032972	0.108904	0.382426	G	A	0.014574	G	major	0.985426
Crk18_SdLen_cm	S04_35525008	4	35525008	0.214364	1.90141	C	A	0.0190583	C	major	0.980942
Crk18_SdLen_cm	S04_48117627	4	48117627	-0.0491537	0.712459	A	G	0.159193	A	major	0.840807
Crk18_SdLen_cm	S04_99870528	4	99870528	-0.213945	0.495345	C	T	0.00448431	C	major	0.995516
Crk18_SdLen_cm	S04_103131373	4	103131373	0.242599	2.7365	T	A	0.0213004	T	major	0.9787
Crk18_SdLen_cm	S04_119394068	4	119394068	-0.17796	1.99457	A	C	0.0280269	A	major	0.971973
Crk18_SdLen_cm	S04_137847829	4	137847829	0.0662489	0.19878	T	C	0.0213004	T	major	0.9787
Crk18_SdLen_cm	S04_199697392	4	199697392	-0.225313	0.583074	G	T	0.00560538	G	major	0.994395
Crk18_SdLen_cm	S04_220130053	4	220130053	0.364113	3.10318	G	A	0.0123318	G	major	0.987668
Crk18_SdLen_cm	S04_239757520	4	239757520	0.182087	2.8979	G	A	0.0930493	G	major	0.906951
Crk18_SdLen_cm	S04_261858888	4	261858888	-0.0948815	0.910072	G	A	0.103139	A	minor	0.103139
Crk18_SdLen_cm	S05_57840749	5	57840749	-0.0104907	0.00299461	T	C	0.0123318	C	minor	0.0123318
Crk18_SdLen_cm	S05_366528709	5	366528709	0.0711419	2.61698	A	G	0.456278	G	minor	0.456278
Crk18_SdLen_cm	S05_397289341	5	397289341	0.103575	0.0571108	G	A	0.00224215	G	major	0.997758
Crk18_SdLen_cm	S06_27073124	6	27073124	-0.341936	3.14517	C	T	0.0123318	C	major	0.987668
Crk18_SdLen_cm	S06_30049280	6	30049280	-0.0578783	0.305082	A	C	0.100897	A	major	0.899103
Crk18_SdLen_cm	S06_166357566	6	166357566	0.0914663	0.100077	G	A	0.00560538	G	major	0.994395
Crk18_SdLen_cm	S06_347530512	6	347530512	0.297358	2.08929	G	A	0.0100897	G	major	0.98991
Crk18_SdLen_cm	S06_373070997	6	373070997	0.0493308	0.127294	G	A	0.0224215	G	major	0.977578
Crk18_SdLen_cm	S06_480699953	6	480699953	-0.178519	0.521942	A	T	0.00672646	A	major	0.993274
Crk18_SdLen_cm	S06_510179340	6	510179340	0.0565661	1.65048	A	G	0.45852	G	minor	0.45852
Crk18_SdLen_cm	S06_518578819	6	518578819	0.0458276	1.07027	C	G	0.422646	G	minor	0.422646
Crk18_SdLen_cm	S06_568793265	6	568793265	-0.0390361	0.842817	G	A	0.420404	A	minor	0.420404
Crk18_SdLen_cm	S07_12079084	7	12079084	0.107133	1.55553	A	G	0.0639013	G	minor	0.0639013
Crk18_SdLen_cm	S07_91555077	7	91555077	-0.202097	1.3236	C	T	0.014574	C	major	0.985426
Crk18_SdLen_cm	S07_103055343	7	103055343	-0.0630697	0.279695	C	G	0.0683857	C	major	0.931614
Crk18_SdLen_cm	S07_156597465	7	156597465	0.0594425	0.0618707	C	T	0.00784753	T	minor	0.00784753
Crk18_SdLen_cm	S07_226848353	7	226848353	-0.0384186	0.107756	G	A	0.07287	A	minor	0.07287
Crk18_SdLen_cm	S07_516499740	7	516499740	-0.00891892	0.0434121	A	G	0.440583	A	major	0.559417
Crk18_SdLen_cm	S08_67484386	8	67484386	0.11761	0.459494	A	G	0.014574	G	minor	0.014574
Crk18_SdLen_cm	S08_121556108	8	121556108	0.169916	2.67838	C	T	0.0986547	T	minor	0.0986547
Crk18_SdLen_cm	S08_197291732	8	197291732	-0.157166	1.91442	C	T	0.073991	C	major	0.926009
Crk18_SdLen_cm	S08_324506204	8	324506204	-0.182062	2.90089	A	G	0.0908072	A	major	0.909193
Crk18_SdLen_cm	S08_425968180	8	425968180	0.03533	0.647016	C	G	0.375561	G	minor	0.375561
Crk18_SdLen_cm	S09_61869885	9	61869885	-0.0344722	0.280024	G	C	0.112108	C	minor	0.112108
Crk18_SdLen_cm	S09_315677404	9	315677404	0.0461284	0.186454	C	A	0.0896861	C	major	0.910314
Crk18_SdLen_cm	S09_385133100	9	385133100	0.0491999	0.661054	G	A	0.137892	G	major	0.862108
Crk18_SdLen_cm	S09_415851589	9	415851589	-0.0245071	0.0472426	C	T	0.0852018	C	major	0.914798
Crk18_SdLen_cm	S10_10944243	10	10944243	0.0057479	0.00109376	G	A	0.014574	G	major	0.985426
Crk18_SdLen_cm	S10_62112342	10	62112342	-0.0269629	0.372439	T	C	0.365471	C	minor	0.365471
Crk18_SdLen_cm	S10_120456859	10	120456859	-0.230413	3.51247	G	A	0.059417	A	minor	0.059417
Crk18_SdLen_cm	S10_447491711	10	447491711	-0.0981436	0.116129	A	G	0.00560538	A	major	0.994395
Crk18_SdLen_cm	S10_459839942	10	459839942	0.0910983	0.530094	G	T	0.0605381	T	minor	0.0605381
Crk18_SdLen_cm	S10_463199055	10	463199055	0.106542	0.0633101	A	C	0.00224215	C	minor	0.00224215
Crk18_SdLen_cm	S11_6019252	11	6019252	-0.0647992	2.2418	G	A	0.471973	A	minor	0.471973
Crk18_SdLen_cm	S11_52972239	11	52972239	-0.18484	1.89186	C	G	0.0257848	C	major	0.974215
Crk18_SdLen_cm	S11_59775443	11	59775443	-0.0945527	1.18612	C	T	0.0616592	C	major	0.938341
Crk18_SdLen_cm	S11_161626009	11	161626009	-0.482922	2.62513	A	G	0.00560538	A	major	0.994395
Crk18_SdLen_cm	S11_191637589	11	191637589	0.153728	0.161899	T	C	0.00336323	T	major	0.996637
Crk18_SdLen_cm	S11_211702566	11	211702566	-0.0912998	0.337963	C	A	0.0213004	A	minor	0.0213004
Crk18_SdLen_cm	S11_227848416	11	227848416	0.0504973	0.0282624	G	A	0.00448431	G	major	0.995516
Crk18_SdLen_cm	S11_235603452	11	235603452	-0.0577111	1.78482	G	A	0.492152	A	minor	0.492152
Crk18_SdLen_cm	S11_241092955	11	241092955	-0.0520234	1.4495	T	A	0.411435	A	minor	0.411435
Crk18_SdLen_cm	S12_25712846	12	25712846	0.0122525	0.0704084	C	T	0.283632	T	minor	0.283632
Crk18_SdLen_cm	S12_87898328	12	87898328	-0.0560444	0.247258	A	G	0.0807175	A	major	0.919283
Crk18_SdLen_cm	S13_9159276	13	9159276	0.298493	0.598675	G	A	0.00336323	G	major	0.996637
Crk18_SdLen_cm	S13_9595560	13	9595560	0.0449773	0.0220475	C	T	0.00448431	T	minor	0.00448431
Crk18_SdLen_cm	S13_17051098	13	17051098	-0.0487498	0.507019	A	G	0.108744	A	major	0.891256
Crk18_SdLen_cm	S13_29748874	13	29748874	0.244704	2.29095	G	A	0.0190583	G	major	0.980942
Crk18_SdLen_cm	S13_51976779	13	51976779	0.0223802	0.280306	T	A	0.492152	T	major	0.507848
Crk18_SdLen_cm	S13_58962015	13	58962015	0.0753168	0.273141	G	A	0.0213004	G	major	0.9787
Crk18_SdLen_cm	S13_134782913	13	134782913	-0.40221	2.66775	C	T	0.00784753	C	major	0.992152
Crk18_SdLen_cm	S13_135391210	13	135391210	-0.26936	1.93928	C	T	0.0123318	C	major	0.987668
Crk18_SdLen_cm	S13_209539816	13	209539816	-0.0803026	0.308563	C	G	0.0213004	C	major	0.9787
Crk18_SdLen_cm	S13_222536639	13	222536639	0.335705	2.49534	G	A	0.0100897	G	major	0.98991
Crk18_SdLen_cm	S13_245158348	13	245158348	0.15106	0.967103	G	C	0.0190583	G	major	0.980942
Crk18_SdLen_cm	S13_248290754	13	248290754	0.0976648	2.72047	A	G	0.144619	G	minor	0.144619
Crk18_SdLen_cm	S13_252462690	13	252462690	0.0235357	0.210365	G	C	0.200673	G	major	0.799327
Crk18_SdLen_cm	S13_265039502	13	265039502	-0.0193058	0.00651605	A	G	0.00784753	A	major	0.992152
Crk18_SdLen_cm	S13_273891126	13	273891126	0.233105	1.38174	G	C	0.0112108	G	major	0.988789
Crk18_SdLen_cm	S14_76804610	14	76804610	0.0154242	0.0983792	C	T	0.234305	T	minor	0.234305
Crk18_SdLen_cm	S14_159035766	14	159035766	-0.0964663	0.20334	C	T	0.0100897	C	major	0.98991
Crk18_SdLen_cm	S14_224203729	14	224203729	-0.0914459	0.301885	A	G	0.0156951	A	major	0.984305
Crk18_SdLen_cm	S14_234445278	14	234445278	-0.0510344	1.39572	G	A	0.376682	A	minor	0.376682
Crk18_SdLen_cm	S14_326710436	14	326710436	-0.0513284	0.372115	G	A	0.0627803	A	minor	0.0627803
Crk18_SdLen_cm	S14_496475519	14	496475519	-0.0619041	0.0842871	C	A	0.00896861	A	minor	0.00896861
Crk18_SdLen_cm	S15_349866048	15	349866048	0.0680005	0.447706	G	C	0.10426	G	major	0.89574
Crk18_SdLen_cm	S15_374356928	15	374356928	0.200061	1.31018	C	T	0.0134529	T	minor	0.0134529
Crk18_SdLen_cm	S15_387961489	15	387961489	-0.268092	0.7791	G	A	0.00448431	A	minor	0.00448431
Crk18_SdLen_cm	S15_412358042	15	412358042	0.0587227	1.54167	T	G	0.28139	T	major	0.71861
Crk18_SdLen_cm	S15_566727557	15	566727557	-0.187551	0.785689	A	C	0.0100897	A	major	0.98991
Crk18_SdLen_cm	S15_582877307	15	582877307	-0.0156847	0.0257883	T	G	0.0493274	G	minor	0.0493274
Crk18_SdLen_cm	S15_600918584	15	600918584	0.047944	1.00471	C	T	0.252242	T	minor	0.252242
Crk18_SdLen_cm	S16_31792648	16	31792648	0.128273	0.673843	T	C	0.0190583	T	major	0.980942
Crk18_SdLen_cm	S16_229832414	16	229832414	-0.192644	2.60104	G	A	0.073991	A	minor	0.073991
Crk18_SdLen_cm	S16_242132329	16	242132329	0.00711122	0.0259438	C	G	0.480942	G	minor	0.480942
Crk18_SdLen_cm	S16_263001852	16	263001852	0.0630536	0.771578	G	A	0.0952915	G	major	0.904709
Crk18_SdLen_cm	S16_296781475	16	296781475	0.0889844	0.675308	G	A	0.0986547	G	major	0.901345
Crk18_SdLen_cm	S16_336657077	16	336657077	0.0670998	2.52982	T	A	0.411435	T	major	0.588565
Crk18_SdLen_cm	S16_336657091	16	336657091	-0.0663886	1.9162	A	C	0.25	A	major	0.75
Crk18_SdLen_cm	S16_399342247	16	399342247	-0.00995354	0.0030604	C	T	0.0134529	C	major	0.986547
Crk18_SdLen_cm	S17_108653775	17	108653775	0.133104	1.60118	T	C	0.0975336	T	major	0.902466
Crk18_SdLen_cm	S17_108653809	17	108653809	-0.128049	1.47073	C	T	0.0964126	C	major	0.903587
Crk18_SdLen_cm	S17_239233309	17	239233309	-0.123044	1.34973	C	T	0.103139	C	major	0.896861
Crk18_SdLen_cm	S17_286648169	17	286648169	0.366155	3.38709	T	C	0.0112108	T	major	0.988789
Crk18_SdLen_cm	S18_31933921	18	31933921	-0.131798	1.57488	C	T	0.0381166	C	major	0.961883
Crk18_SdLen_cm	S18_62374700	18	62374700	0.105016	0.877891	G	A	0.0347534	G	major	0.965247
Crk18_SdLen_cm	S18_75576716	18	75576716	0.18981	1.527	T	C	0.0201794	T	major	0.979821
Crk18_SdLen_cm	S18_112460873	18	112460873	-0.141925	1.30477	G	A	0.0605381	A	minor	0.0605381
Crk18_SdLen_cm	S18_182594987	18	182594987	-0.0884486	0.660097	G	T	0.0840807	G	major	0.915919
Crk18_SdLen_cm	S18_412960071	18	412960071	-0.076051	0.534	A	G	0.0975336	A	major	0.902466
Crk18_SdLen_cm	S18_426508862	18	426508862	-0.438165	2.80525	G	T	0.00672646	G	major	0.993274
Crk18_SdLen_cm	S18_482517030	18	482517030	-0.158115	1.63278	G	A	0.0616592	A	minor	0.0616592
Crk18_SdLen_cm	S18_545444320	18	545444320	-0.0563243	0.232984	G	A	0.0762332	A	minor	0.0762332
Crk18_SdLen_cm	S19_70012848	19	70012848	0.12272	1.0579	G	A	0.0683857	G	major	0.931614
Crk18_SdLen_cm	S19_124074654	19	124074654	0.00740997	0.0216211	G	A	0.221973	G	major	0.778027
Crk18_SdLen_cm	S19_543224680	19	543224680	-0.0911885	0.355852	A	C	0.0190583	A	major	0.980942
Crk18_SdLen_cm	S19_551502245	19	551502245	-0.0983261	0.0650405	C	A	0.00336323	A	minor	0.00336323
Crk18_SdLen_cm	S19_634869001	19	634869001	0.027143	0.369842	T	C	0.330717	T	major	0.669283
Crk18_SdLen_cm	S19_677800667	19	677800667	-0.141753	2.07411	T	A	0.0964126	A	minor	0.0964126
Crk18_SdLen_cm	S19_692361944	19	692361944	0.0130237	0.0177028	G	T	0.0930493	T	minor	0.0930493
Crk18_SdLen_cm	S19_736363601	19	736363601	-0.00232303	0.00240009	C	G	0.340807	C	major	0.659193
Crk18_SdLen_cm	S20_35656076	20	35656076	-0.0584629	1.21156	G	T	0.196188	G	major	0.803812
Crk18_SdLen_cm	S20_89189834	20	89189834	-0.110084	0.208869	A	G	0.00784753	A	major	0.992152
Crk18_SdLen_cm	S20_148333930	20	148333930	-0.156278	2.19769	C	A	0.0908072	A	minor	0.0908072
Crk18_SdLen_cm	S20_158929692	20	158929692	-0.0817525	0.0718407	A	G	0.00448431	A	major	0.995516
Crk18_SdLen_cm	S20_339143703	20	339143703	0.168275	2.82326	G	A	0.105381	G	major	0.894619
Crk18_SdLen_cm	S20_404723936	20	404723936	-0.334267	1.2188	A	T	0.00448431	A	major	0.995516
Crk18_SdLen_cm	S20_405356717	20	405356717	-0.0427728	1.04834	T	A	0.460762	A	minor	0.460762
Crk18_SdLen_cm	S20_488953056	20	488953056	0.000609588	1.40928e-05	C	G	0.0168161	G	minor	0.0168161
Crk18_SdLen_cm	S20_580880025	20	580880025	-0.165084	0.719786	A	G	0.0112108	A	major	0.988789
Crk18_SdLen_cm	S20_603356555	20	603356555	-0.218986	2.95315	A	C	0.0280269	A	major	0.971973
Crk18_SdLen_cm	S21_66129792	21	66129792	0.31448	2.06992	C	G	0.00896861	G	minor	0.00896861
Crk18_SdLen_cm	S21_86037764	21	86037764	0.0456875	0.529667	T	C	0.127803	T	major	0.872197
Crk18_SdLen_cm	S21_90650201	21	90650201	0.0580712	1.84147	T	C	0.375561	T	major	0.624439
Crk18_SdLen_cm	S21_90762051	21	90762051	0.482922	2.62513	T	C	0.00560538	T	major	0.994395
Crk18_SdLen_cm	S21_118538093	21	118538093	0.231994	1.68544	G	A	0.0134529	G	major	0.986547
Crk18_SdLen_cm	S21_187878445	21	187878445	-0.211229	0.517846	T	A	0.00560538	A	minor	0.00560538
Crk18_SdLen_cm	S21_202424506	21	202424506	-0.303466	1.11424	G	A	0.00560538	A	minor	0.00560538
Crk18_SdLen_cm	S21_411630228	21	411630228	-0.500633	2.51848	C	T	0.00448431	C	major	0.995516
Crk18_SdLen_cm	S21_440793454	21	440793454	-0.0164149	0.00144813	C	T	0.00224215	C	major	0.997758
Crk18_SdWdth_cm	S01_29528910	1	29528910	-0.0171228	0.330359	G	A	0.0369955	A	minor	0.0369955
Crk18_SdWdth_cm	S01_425640986	1	425640986	0.00139142	0.000332007	C	G	0.00560538	G	minor	0.00560538
Crk18_SdWdth_cm	S01_440284589	1	440284589	0.0557835	0.725419	G	C	0.00784753	G	major	0.992152
Crk18_SdWdth_cm	S01_441127557	1	441127557	0.0557967	0.467479	G	C	0.00448431	G	major	0.995516
Crk18_SdWdth_cm	S01_448040019	1	448040019	0.00665582	0.0552522	G	A	0.0369955	G	major	0.963004
Crk18_SdWdth_cm	S02_21200739	2	21200739	-0.0211888	0.112393	C	T	0.00784753	C	major	0.992152
Crk18_SdWdth_cm	S02_86294469	2	86294469	-0.0050651	0.176408	A	G	0.334081	A	major	0.665919
Crk18_SdWdth_cm	S02_110750907	2	110750907	-0.00315875	0.0678767	C	T	0.328475	C	major	0.671525
Crk18_SdWdth_cm	S02_120531680	2	120531680	0.0246367	0.585752	A	T	0.0672646	T	minor	0.0672646
Crk18_SdWdth_cm	S02_132955695	2	132955695	-0.0125605	0.0736329	A	G	0.014574	A	major	0.985426
Crk18_SdWdth_cm	S02_143430838	2	143430838	-0.0290508	0.728463	C	T	0.0639013	C	major	0.936099
Crk18_SdWdth_cm	S02_163841443	2	163841443	0.0117473	0.1751	A	G	0.0941704	G	minor	0.0941704
Crk18_SdWdth_cm	S02_280450209	2	280450209	-0.0375468	0.326987	G	A	0.00672646	A	minor	0.00672646
Crk18_SdWdth_cm	S02_327466245	2	327466245	0.00415715	0.00530793	C	T	0.00896861	T	minor	0.00896861
Crk18_SdWdth_cm	S02_403257803	2	403257803	0.0178353	0.35785	T	G	0.0840807	T	major	0.915919
Crk18_SdWdth_cm	S03_58073504	3	58073504	0.0184627	2.14161	G	A	0.337444	G	major	0.662556
Crk18_SdWdth_cm	S03_290939373	3	290939373	-0.0330499	0.712968	G	A	0.0201794	A	minor	0.0201794
Crk18_SdWdth_cm	S03_337625064	3	337625064	-0.00813496	0.501241	T	G	0.433857	G	minor	0.433857
Crk18_SdWdth_cm	S03_354805182	3	354805182	-0.0113195	0.146945	C	A	0.0336323	A	minor	0.0336323
Crk18_SdWdth_cm	S03_407190205	3	407190205	0.0244504	0.811348	A	G	0.10426	G	minor	0.10426
Crk18_SdWdth_cm	S03_431611782	3	431611782	-0.00183992	0.00105085	T	A	0.00896861	A	minor	0.00896861
Crk18_SdWdth_cm	S03_477602723	3	477602723	0.0179152	0.212187	A	C	0.0213004	C	minor	0.0213004
Crk18_SdWdth_cm	S04_5654320	4	5654320	-0.016508	2.16735	G	C	0.431614	C	minor	0.431614
Crk18_SdWdth_cm	S04_31032972	4	31032972	0.0176927	0.141845	G	A	0.014574	G	major	0.985426
Crk18_SdWdth_cm	S04_35525008	4	35525008	0.0165468	0.158827	C	A	0.0190583	C	major	0.980942
Crk18_SdWdth_cm	S04_48117627	4	48117627	-0.00122955	0.00622443	A	G	0.159193	A	major	0.840807
Crk18_SdWdth_cm	S04_99870528	4	99870528	-0.0366852	0.206012	C	T	0.00448431	C	major	0.995516
Crk18_SdWdth_cm	S04_103131373	4	103131373	0.0244339	0.389514	T	A	0.0213004	T	major	0.9787
Crk18_SdWdth_cm	S04_119394068	4	119394068	-0.00717727	0.0456726	A	C	0.0280269	A	major	0.971973
Crk18_SdWdth_cm	S04_137847829	4	137847829	0.033431	0.708131	T	C	0.0213004	T	major	0.9787
Crk18_SdWdth_cm	S04_199697392	4	199697392	-0.0903642	1.31571	G	T	0.00560538	G	major	0.994395
Crk18_SdWdth_cm	S04_220130053	4	220130053	0.0552428	0.999558	G	A	0.0123318	G	major	0.987668
Crk18_SdWdth_cm	S04_239757520	4	239757520	0.0258866	0.821338	G	A	0.0930493	G	major	0.906951
Crk18_SdWdth_cm	S04_261858888	4	261858888	-0.0319862	1.46259	G	A	0.103139	A	minor	0.103139
Crk18_SdWdth_cm	S05_57840749	5	57840749	0.0286052	0.313124	T	C	0.0123318	T	major	0.987668
Crk18_SdWdth_cm	S05_366528709	5	366528709	0.011177	0.901941	A	G	0.456278	G	minor	0.456278
Crk18_SdWdth_cm	S05_397289341	5	397289341	-0.00788111	0.00466277	G	A	0.00224215	A	minor	0.00224215
Crk18_SdWdth_cm	S06_27073124	6	27073124	-0.027491	0.28564	C	T	0.0123318	C	major	0.987668
Crk18_SdWdth_cm	S06_30049280	6	30049280	-0.0400921	2.04875	A	C	0.100897	A	major	0.899103
Crk18_SdWdth_cm	S06_166357566	6	166357566	-0.000475889	3.8186e-05	G	A	0.00560538	A	minor	0.00560538
Crk18_SdWdth_cm	S06_347530512	6	347530512	0.00179449	0.00107978	G	A	0.0100897	G	major	0.98991
Crk18_SdWdth_cm	S06_373070997	6	373070997	-0.020277	0.303152	G	A	0.0224215	A	minor	0.0224215
Crk18_SdWdth_cm	S06_480699953	6	480699953	-0.0308059	0.219848	A	T	0.00672646	A	major	0.993274
Crk18_SdWdth_cm	S06_510179340	6	510179340	0.00764946	0.422278	A	G	0.45852	G	minor	0.45852
Crk18_SdWdth_cm	S06_518578819	6	518578819	0.00686329	0.33456	C	G	0.422646	G	minor	0.422646
Crk18_SdWdth_cm	S06_568793265	6	568793265	-0.0225931	3.9536	G	A	0.420404	A	minor	0.420404
Crk18_SdWdth_cm	S07_12079084	7	12079084	0.00282701	0.015284	A	G	0.0639013	G	minor	0.0639013
Crk18_SdWdth_cm	S07_91555077	7	91555077	-0.029562	0.399038	C	T	0.014574	C	major	0.985426
Crk18_SdWdth_cm	S07_103055343	7	103055343	-0.00929636	0.0852933	C	G	0.0683857	C	major	0.931614
Crk18_SdWdth_cm	S07_156597465	7	156597465	-0.0193847	0.0931604	C	T	0.00784753	C	major	0.992152
Crk18_SdWdth_cm	S07_226848353	7	226848353	0.0141777	0.206109	G	A	0.07287	G	major	0.92713
Crk18_SdWdth_cm	S07_516499740	7	516499740	0.0113259	0.985306	A	G	0.440583	G	minor	0.440583
Crk18_SdWdth_cm	S08_67484386	8	67484386	-0.0313706	0.46186	A	G	0.014574	A	major	0.985426
Crk18_SdWdth_cm	S08_121556108	8	121556108	0.0347602	1.57321	C	T	0.0986547	T	minor	0.0986547
Crk18_SdWdth_cm	S08_197291732	8	197291732	-0.0391313	1.6737	C	T	0.073991	C	major	0.926009
Crk18_SdWdth_cm	S08_324506204	8	324506204	-0.020752	0.529173	A	G	0.0908072	A	major	0.909193
Crk18_SdWdth_cm	S08_425968180	8	425968180	0.0186171	2.51676	C	G	0.375561	G	minor	0.375561
Crk18_SdWdth_cm	S09_61869885	9	61869885	-0.0149192	0.738081	G	C	0.112108	C	minor	0.112108
Crk18_SdWdth_cm	S09_315677404	9	315677404	0.018772	0.433584	C	A	0.0896861	C	major	0.910314
Crk18_SdWdth_cm	S09_385133100	9	385133100	0.0105503	0.426407	G	A	0.137892	G	major	0.862108
Crk18_SdWdth_cm	S09_415851589	9	415851589	-0.00499767	0.0276237	C	T	0.0852018	C	major	0.914798
Crk18_SdWdth_cm	S10_10944243	10	10944243	0.0483054	1.09104	G	A	0.014574	G	major	0.985426
Crk18_SdWdth_cm	S10_62112342	10	62112342	-0.0061005	0.267128	T	C	0.365471	C	minor	0.365471
Crk18_SdWdth_cm	S10_120456859	10	120456859	-0.0285394	0.761641	G	A	0.059417	A	minor	0.059417
Crk18_SdWdth_cm	S10_447491711	10	447491711	-0.0183884	0.0575373	A	G	0.00560538	A	major	0.994395
Crk18_SdWdth_cm	S10_459839942	10	459839942	-0.0175833	0.277764	G	T	0.0605381	G	major	0.939462
Crk18_SdWdth_cm	S10_463199055	10	463199055	-0.043648	0.150588	A	C	0.00224215	A	major	0.997758
Crk18_SdWdth_cm	S11_6019252	11	6019252	-0.00764553	0.434332	G	A	0.471973	A	minor	0.471973
Crk18_SdWdth_cm	S11_52972239	11	52972239	-0.0513052	2.04497	C	G	0.0257848	C	major	0.974215
Crk18_SdWdth_cm	S11_59775443	11	59775443	-0.0105802	0.208836	C	T	0.0616592	C	major	0.938341
Crk18_SdWdth_cm	S11_161626009	11	161626009	-0.0798732	1.00493	A	G	0.00560538	A	major	0.994395
Crk18_SdWdth_cm	S11_191637589	11	191637589	0.0649195	0.409051	T	C	0.00336323	T	major	0.996637
Crk18_SdWdth_cm	S11_211702566	11	211702566	-0.0583618	1.95372	C	A	0.0213004	A	minor	0.0213004
Crk18_SdWdth_cm	S11_227848416	11	227848416	0.0397319	0.248098	G	A	0.00448431	G	major	0.995516
Crk18_SdWdth_cm	S11_235603452	11	235603452	-0.00507168	0.191802	G	A	0.492152	A	minor	0.492152
Crk18_SdWdth_cm	S11_241092955	11	241092955	-0.00958662	0.687678	T	A	0.411435	A	minor	0.411435
Crk18_SdWdth_cm	S12_25712846	12	25712846	0.00490683	0.158635	C	T	0.283632	T	minor	0.283632
Crk18_SdWdth_cm	S12_87898328	12	87898328	-0.0415479	1.90534	A	G	0.0807175	A	major	0.919283
Crk18_SdWdth_cm	S13_9159276	13	9159276	0.0793349	0.597349	G	A	0.00336323	G	major	0.996637
Crk18_SdWdth_cm	S13_9595560	13	9595560	-0.00812697	0.010175	C	T	0.00448431	C	major	0.995516
Crk18_SdWdth_cm	S13_17051098	13	17051098	-0.0271021	2.18836	A	G	0.108744	A	major	0.891256
Crk18_SdWdth_cm	S13_29748874	13	29748874	0.0462638	1.14677	G	A	0.0190583	G	major	0.980942
Crk18_SdWdth_cm	S13_51976779	13	51976779	-0.0171504	2.31168	T	A	0.492152	A	minor	0.492152
Crk18_SdWdth_cm	S13_58962015	13	58962015	0.0268208	0.488032	G	A	0.0213004	G	major	0.9787
Crk18_SdWdth_cm	S13_134782913	13	134782913	-0.0803144	1.49115	C	T	0.00784753	C	major	0.992152
Crk18_SdWdth_cm	S13_135391210	13	135391210	-0.0742894	2.06842	C	T	0.0123318	C	major	0.987668
Crk18_SdWdth_cm	S13_209539816	13	209539816	-0.0097971	0.06462	C	G	0.0213004	C	major	0.9787
Crk18_SdWdth_cm	S13_222536639	13	222536639	0.0644987	1.29459	G	A	0.0100897	G	major	0.98991
Crk18_SdWdth_cm	S13_245158348	13	245158348	0.059176	2.09164	G	C	0.0190583	G	major	0.980942
Crk18_SdWdth_cm	S13_248290754	13	248290754	-0.000722558	0.00208903	A	G	0.144619	A	major	0.855381
Crk18_SdWdth_cm	S13_252462690	13	252462690	-0.00262405	0.0368987	G	C	0.200673	C	minor	0.200673
Crk18_SdWdth_cm	S13_265039502	13	265039502	0.00467846	0.00539672	A	G	0.00784753	G	minor	0.00784753
Crk18_SdWdth_cm	S13_273891126	13	273891126	0.0226428	0.183642	G	C	0.0112108	G	major	0.988789
Crk18_SdWdth_cm	S14_76804610	14	76804610	0.00832021	0.402223	C	T	0.234305	T	minor	0.234305
Crk18_SdWdth_cm	S14_159035766	14	159035766	-0.0302981	0.282356	C	T	0.0100897	C	major	0.98991
Crk18_SdWdth_cm	S14_224203729	14	224203729	0.00866013	0.0381807	A	G	0.0156951	G	minor	0.0156951
Crk18_SdWdth_cm	S14_234445278	14	234445278	-0.000428311	0.00137762	G	A	0.376682	A	minor	0.376682
Crk18_SdWdth_cm	S14_326710436	14	326710436	-0.0320471	2.0469	G	A	0.0627803	A	minor	0.0627803
Crk18_SdWdth_cm	S14_496475519	14	496475519	0.0589883	1.08447	C	A	0.00896861	C	major	0.991031
Crk18_SdWdth_cm	S15_349866048	15	349866048	0.0112274	0.171482	G	C	0.10426	G	major	0.89574
Crk18_SdWdth_cm	S15_374356928	15	374356928	0.0354365	0.582379	C	T	0.0134529	T	minor	0.0134529
Crk18_SdWdth_cm	S15_387961489	15	387961489	-0.0258418	0.102282	G	A	0.00448431	A	minor	0.00448431
Crk18_SdWdth_cm	S15_412358042	15	412358042	0.0136896	1.17084	T	G	0.28139	T	major	0.71861
Crk18_SdWdth_cm	S15_566727557	15	566727557	-0.057297	1.03462	A	C	0.0100897	A	major	0.98991
Crk18_SdWdth_cm	S15_582877307	15	582877307	0.0207158	0.633721	T	G	0.0493274	T	major	0.950673
Crk18_SdWdth_cm	S15_600918584	15	600918584	-0.00300235	0.0553815	C	T	0.252242	C	major	0.747758
Crk18_SdWdth_cm	S16_31792648	16	31792648	0.0526723	1.60213	T	C	0.0190583	T	major	0.980942
Crk18_SdWdth_cm	S16_229832414	16	229832414	-0.00180995	0.00322907	G	A	0.073991	A	minor	0.073991
Crk18_SdWdth_cm	S16_242132329	16	242132329	0.00408303	0.118466	C	G	0.480942	G	minor	0.480942
Crk18_SdWdth_cm	S16_263001852	16	263001852	0.0308759	2.60345	G	A	0.0952915	G	major	0.904709
Crk18_SdWdth_cm	S16_296781475	16	296781475	0.0103411	0.126809	G	A	0.0986547	G	major	0.901345
Crk18_SdWdth_cm	S16_336657077	16	336657077	0.00841932	0.560077	T	A	0.411435	T	major	0.588565
Crk18_SdWdth_cm	S16_336657091	16	336657091	-0.00386581	0.0912487	A	C	0.25	A	major	0.75
Crk18_SdWdth_cm	S16_399342247	16	399342247	-0.0349483	0.530041	C	T	0.0134529	C	major	0.986547
Crk18_SdWdth_cm	S17_108653775	17	108653775	0.0285907	1.0346	T	C	0.0975336	T	major	0.902466
Crk18_SdWdth_cm	S17_108653809	17	108653809	-0.023658	0.703041	C	T	0.0964126	C	major	0.903587
Crk18_SdWdth_cm	S17_239233309	17	239233309	-0.0413173	2.12544	C	T	0.103139	C	major	0.896861
Crk18_SdWdth_cm	S17_286648169	17	286648169	0.0485204	0.836097	T	C	0.0112108	T	major	0.988789
Crk18_SdWdth_cm	S18_31933921	18	31933921	-0.00209197	0.00562672	C	T	0.0381166	C	major	0.961883
Crk18_SdWdth_cm	S18_62374700	18	62374700	0.038471	1.66086	G	A	0.0347534	G	major	0.965247
Crk18_SdWdth_cm	S18_75576716	18	75576716	0.0407274	0.985067	T	C	0.0201794	T	major	0.979821
Crk18_SdWdth_cm	S18_112460873	18	112460873	-0.0274751	0.688673	G	A	0.0605381	A	minor	0.0605381
Crk18_SdWdth_cm	S18_182594987	18	182594987	-0.0337958	1.35548	G	T	0.0840807	G	major	0.915919
Crk18_SdWdth_cm	S18_412960071	18	412960071	-0.041607	2.24034	A	G	0.0975336	A	major	0.902466
Crk18_SdWdth_cm	S18_426508862	18	426508862	-0.0655214	0.876661	G	T	0.00672646	G	major	0.993274
Crk18_SdWdth_cm	S18_482517030	18	482517030	-0.0725457	4.82622	G	A	0.0616592	A	minor	0.0616592
Crk18_SdWdth_cm	S18_545444320	18	545444320	-0.0357252	1.31581	G	A	0.0762332	A	minor	0.0762332
Crk18_SdWdth_cm	S19_70012848	19	70012848	-0.00471804	0.0219703	G	A	0.0683857	A	minor	0.0683857
Crk18_SdWdth_cm	S19_124074654	19	124074654	0.0116379	0.747659	G	A	0.221973	G	major	0.778027
Crk18_SdWdth_cm	S19_543224680	19	543224680	0.00345895	0.00722519	A	C	0.0190583	C	minor	0.0190583
Crk18_SdWdth_cm	S19_551502245	19	551502245	0.00924744	0.00813203	C	A	0.00336323	C	major	0.996637
Crk18_SdWdth_cm	S19_634869001	19	634869001	0.00348712	0.0854776	T	C	0.330717	T	major	0.669283
Crk18_SdWdth_cm	S19_677800667	19	677800667	-0.0239664	0.832799	T	A	0.0964126	A	minor	0.0964126
Crk18_SdWdth_cm	S19_692361944	19	692361944	0.0294406	1.27358	G	T	0.0930493	T	minor	0.0930493
Crk18_SdWdth_cm	S19_736363601	19	736363601	-0.00159565	0.0159857	C	G	0.340807	C	major	0.659193
Crk18_SdWdth_cm	S20_35656076	20	35656076	-0.0115928	0.667975	G	T	0.196188	G	major	0.803812
Crk18_SdWdth_cm	S20_89189834	20	89189834	0.0177432	0.0765778	A	G	0.00784753	G	minor	0.00784753
Crk18_SdWdth_cm	S20_148333930	20	148333930	-0.00818068	0.0848873	C	A	0.0908072	A	minor	0.0908072
Crk18_SdWdth_cm	S20_158929692	20	158929692	0.0124366	0.0234576	A	G	0.00448431	G	minor	0.00448431
Crk18_SdWdth_cm	S20_339143703	20	339143703	0.0048987	0.033633	G	A	0.105381	G	major	0.894619
Crk18_SdWdth_cm	S20_404723936	20	404723936	-0.0356492	0.195945	A	T	0.00448431	A	major	0.995516
Crk18_SdWdth_cm	S20_405356717	20	405356717	-0.00447897	0.161615	T	A	0.460762	A	minor	0.460762
Crk18_SdWdth_cm	S20_488953056	20	488953056	0.0106751	0.0609073	C	G	0.0168161	G	minor	0.0168161
Crk18_SdWdth_cm	S20_580880025	20	580880025	0.0308809	0.35581	A	G	0.0112108	G	minor	0.0112108
Crk18_SdWdth_cm	S20_603356555	20	603356555	-0.0259571	0.583324	A	C	0.0280269	A	major	0.971973
Crk18_SdWdth_cm	S21_66129792	21	66129792	0.0165609	0.0811268	C	G	0.00896861	G	minor	0.00896861
Crk18_SdWdth_cm	S21_86037764	21	86037764	0.0213191	1.61742	T	C	0.127803	T	major	0.872197
Crk18_SdWdth_cm	S21_90650201	21	90650201	0.000617375	0.00292282	T	C	0.375561	T	major	0.624439
Crk18_SdWdth_cm	S21_90762051	21	90762051	0.0798732	1.00493	T	C	0.00560538	T	major	0.994395
Crk18_SdWdth_cm	S21_118538093	21	118538093	-0.0117518	0.0608365	G	A	0.0134529	A	minor	0.0134529
Crk18_SdWdth_cm	S21_187878445	21	187878445	-0.0522973	0.445706	T	A	0.00560538	A	minor	0.00560538
Crk18_SdWdth_cm	S21_202424506	21	202424506	-0.062552	0.668653	G	A	0.00560538	A	minor	0.00560538
Crk18_SdWdth_cm	S21_411630228	21	411630228	-0.0769976	0.834967	C	T	0.00448431	C	major	0.995516
Crk18_SdWdth_cm	S21_440793454	21	440793454	0.115442	1.00966	C	T	0.00224215	T	minor	0.00224215
Crk18_SpkLen_cm	S01_29528910	1	29528910	-0.768909	1.14937	G	A	0.0365854	A	minor	0.0365854
Crk18_SpkLen_cm	S01_425640986	1	425640986	1.34528	0.499624	C	G	0.00554324	G	minor	0.00554324
Crk18_SpkLen_cm	S01_440284589	1	440284589	-0.494725	0.0976307	G	C	0.00776053	C	minor	0.00776053
Crk18_SpkLen_cm	S01_441127557	1	441127557	0.483466	0.0574541	G	C	0.00443459	G	major	0.995565
Crk18_SpkLen_cm	S01_448040019	1	448040019	0.396732	0.324614	G	A	0.0388027	G	major	0.961197
Crk18_SpkLen_cm	S02_21200739	2	21200739	0.00312678	3.91991e-06	C	T	0.00776053	T	minor	0.00776053
Crk18_SpkLen_cm	S02_86294469	2	86294469	-0.0638034	0.0507243	A	G	0.332594	A	major	0.667406
Crk18_SpkLen_cm	S02_110750907	2	110750907	-0.104557	0.132938	C	T	0.329268	C	major	0.670732
Crk18_SpkLen_cm	S02_120531680	2	120531680	0.477361	0.37671	A	T	0.0676275	T	minor	0.0676275
Crk18_SpkLen_cm	S02_132955695	2	132955695	-0.00814346	5.07348e-05	A	G	0.0144124	A	major	0.985588
Crk18_SpkLen_cm	S02_143430838	2	143430838	-0.407077	0.2495	C	T	0.0643016	C	major	0.935698
Crk18_SpkLen_cm	S02_163841443	2	163841443	0.306473	0.207245	A	G	0.094235	G	minor	0.094235
Crk18_SpkLen_cm	S02_280450209	2	280450209	0.170615	0.0107749	G	A	0.00665188	G	major	0.993348
Crk18_SpkLen_cm	S02_327466245	2	327466245	1.26182	0.78556	C	T	0.00886918	T	minor	0.00886918
Crk18_SpkLen_cm	S02_403257803	2	403257803	0.0954576	0.0177192	T	G	0.0831486	T	major	0.916851
Crk18_SpkLen_cm	S03_58073504	3	58073504	0.107916	0.130238	G	A	0.338137	G	major	0.661863
Crk18_SpkLen_cm	S03_290939373	3	290939373	-0.917617	0.917652	G	A	0.0199557	A	minor	0.0199557
Crk18_SpkLen_cm	S03_337625064	3	337625064	-0.0934748	0.115616	T	G	0.431264	G	minor	0.431264
Crk18_SpkLen_cm	S03_354805182	3	354805182	-0.503383	0.457376	C	A	0.0332594	A	minor	0.0332594
Crk18_SpkLen_cm	S03_407190205	3	407190205	-0.0790436	0.0145521	A	G	0.104213	A	major	0.895787
Crk18_SpkLen_cm	S03_431611782	3	431611782	2.54633	3.1789	T	A	0.00886918	T	major	0.991131
Crk18_SpkLen_cm	S03_477602723	3	477602723	0.545931	0.323945	A	C	0.0210643	C	minor	0.0210643
Crk18_SpkLen_cm	S04_5654320	4	5654320	-0.112589	0.174567	G	C	0.435698	C	minor	0.435698
Crk18_SpkLen_cm	S04_31032972	4	31032972	-0.484802	0.179657	G	A	0.0144124	A	minor	0.0144124
Crk18_SpkLen_cm	S04_35525008	4	35525008	0.77055	0.667712	C	A	0.0210643	C	major	0.978936
Crk18_SpkLen_cm	S04_48117627	4	48117627	0.0676531	0.0344136	A	G	0.161863	G	minor	0.161863
Crk18_SpkLen_cm	S04_99870528	4	99870528	0.880436	0.189545	C	T	0.00443459	T	minor	0.00443459
Crk18_SpkLen_cm	S04_103131373	4	103131373	-0.00564329	3.55771e-05	T	A	0.0210643	A	minor	0.0210643
Crk18_SpkLen_cm	S04_119394068	4	119394068	0.192399	0.0548403	A	C	0.0277162	C	minor	0.0277162
Crk18_SpkLen_cm	S04_137847829	4	137847829	0.0955783	0.0101549	T	C	0.0210643	T	major	0.978936
Crk18_SpkLen_cm	S04_199697392	4	199697392	-0.0785199	0.00168655	G	T	0.00554324	G	major	0.994457
Crk18_SpkLen_cm	S04_220130053	4	220130053	0.703163	0.284444	G	A	0.0121951	G	major	0.987805
Crk18_SpkLen_cm	S04_239757520	4	239757520	0.626761	0.844899	G	A	0.094235	G	major	0.905765
Crk18_SpkLen_cm	S04_261858888	4	261858888	0.0967897	0.0217996	G	A	0.103104	G	major	0.896896
Crk18_SpkLen_cm	S05_57840749	5	57840749	-0.15511	0.0155116	T	C	0.0121951	C	minor	0.0121951
Crk18_SpkLen_cm	S05_366528709	5	366528709	0.174072	0.39529	A	G	0.455654	G	minor	0.455654
Crk18_SpkLen_cm	S05_397289341	5	397289341	-3.19491	1.25901	G	A	0.0022173	A	minor	0.0022173
Crk18_SpkLen_cm	S06_27073124	6	27073124	-0.320825	0.0660654	C	T	0.0121951	C	major	0.987805
Crk18_SpkLen_cm	S06_30049280	6	30049280	-0.155806	0.0554461	A	C	0.101996	A	major	0.898004
Crk18_SpkLen_cm	S06_166357566	6	166357566	-3.04157	2.56694	G	A	0.00554324	A	minor	0.00554324
Crk18_SpkLen_cm	S06_347530512	6	347530512	0.0266762	0.000457652	G	A	0.0121951	G	major	0.987805
Crk18_SpkLen_cm	S06_373070997	6	373070997	-0.673346	0.550107	G	A	0.0221729	A	minor	0.0221729
Crk18_SpkLen_cm	S06_480699953	6	480699953	0.329211	0.040202	A	T	0.00665188	T	minor	0.00665188
Crk18_SpkLen_cm	S06_510179340	6	510179340	0.135951	0.237957	A	G	0.455654	G	minor	0.455654
Crk18_SpkLen_cm	S06_518578819	6	518578819	-0.198723	0.513468	C	G	0.422395	C	major	0.577605
Crk18_SpkLen_cm	S06_568793265	6	568793265	-0.14577	0.290771	G	A	0.424612	A	minor	0.424612
Crk18_SpkLen_cm	S07_12079084	7	12079084	0.269099	0.235115	A	G	0.0654102	G	minor	0.0654102
Crk18_SpkLen_cm	S07_91555077	7	91555077	0.313179	0.0748856	C	T	0.0144124	T	minor	0.0144124
Crk18_SpkLen_cm	S07_103055343	7	103055343	-1.40746	3.41986	C	G	0.0687361	C	major	0.931264
Crk18_SpkLen_cm	S07_156597465	7	156597465	0.38155	0.0755747	C	T	0.00997783	T	minor	0.00997783
Crk18_SpkLen_cm	S07_226848353	7	226848353	-0.200269	0.0723098	G	A	0.0742794	A	minor	0.0742794
Crk18_SpkLen_cm	S07_516499740	7	516499740	0.0515217	0.0345871	A	G	0.440133	G	minor	0.440133
Crk18_SpkLen_cm	S08_67484386	8	67484386	1.25272	1.19941	A	G	0.0144124	G	minor	0.0144124
Crk18_SpkLen_cm	S08_121556108	8	121556108	0.763806	1.32077	C	T	0.0986696	T	minor	0.0986696
Crk18_SpkLen_cm	S08_197291732	8	197291732	-0.471856	0.40175	C	T	0.0731707	C	major	0.926829
Crk18_SpkLen_cm	S08_324506204	8	324506204	-0.220881	0.102352	A	G	0.0898004	A	major	0.9102
Crk18_SpkLen_cm	S08_425968180	8	425968180	0.0813964	0.0844589	C	G	0.371397	G	minor	0.371397
Crk18_SpkLen_cm	S09_61869885	9	61869885	0.0279205	0.00453013	G	C	0.117517	G	major	0.882483
Crk18_SpkLen_cm	S09_315677404	9	315677404	-0.211295	0.0939641	C	A	0.0886918	A	minor	0.0886918
Crk18_SpkLen_cm	S09_385133100	9	385133100	-0.0272774	0.00501995	G	A	0.140798	A	minor	0.140798
Crk18_SpkLen_cm	S09_415851589	9	415851589	0.602717	0.692408	C	T	0.0853659	T	minor	0.0853659
Crk18_SpkLen_cm	S10_10944243	10	10944243	0.25113	0.0559171	G	A	0.0166297	G	major	0.98337
Crk18_SpkLen_cm	S10_62112342	10	62112342	-0.0117744	0.00173845	T	C	0.365854	C	minor	0.365854
Crk18_SpkLen_cm	S10_120456859	10	120456859	-0.729012	0.818771	G	A	0.059867	A	minor	0.059867
Crk18_SpkLen_cm	S10_447491711	10	447491711	1.50124	0.626141	A	G	0.00554324	G	minor	0.00554324
Crk18_SpkLen_cm	S10_459839942	10	459839942	1.15012	2.04748	G	T	0.0609756	T	minor	0.0609756
Crk18_SpkLen_cm	S10_463199055	10	463199055	0.307535	0.0117309	A	C	0.0022173	C	minor	0.0022173
Crk18_SpkLen_cm	S11_6019252	11	6019252	-0.233766	0.753638	G	A	0.471175	A	minor	0.471175
Crk18_SpkLen_cm	S11_52972239	11	52972239	-0.106172	0.0149803	C	G	0.0254989	C	major	0.974501
Crk18_SpkLen_cm	S11_59775443	11	59775443	0.380252	0.454109	C	T	0.0609756	T	minor	0.0609756
Crk18_SpkLen_cm	S11_161626009	11	161626009	-0.718021	0.142076	A	G	0.00554324	A	major	0.994457
Crk18_SpkLen_cm	S11_191637589	11	191637589	0.493351	0.0377002	T	C	0.00332594	T	major	0.996674
Crk18_SpkLen_cm	S11_211702566	11	211702566	0.364437	0.122421	C	A	0.0210643	C	major	0.978936
Crk18_SpkLen_cm	S11_227848416	11	227848416	-0.388222	0.0373501	G	A	0.00443459	A	minor	0.00443459
Crk18_SpkLen_cm	S11_235603452	11	235603452	-0.0244192	0.00833838	G	A	0.491131	A	minor	0.491131
Crk18_SpkLen_cm	S11_241092955	11	241092955	-0.0893601	0.108214	T	A	0.411308	A	minor	0.411308
Crk18_SpkLen_cm	S12_25712846	12	25712846	0.177301	0.3555	C	T	0.284922	T	minor	0.284922
Crk18_SpkLen_cm	S12_87898328	12	87898328	-0.460692	0.408694	A	G	0.0798226	A	major	0.920177
Crk18_SpkLen_cm	S13_9159276	13	9159276	-0.562441	0.0880124	G	A	0.00554324	A	minor	0.00554324
Crk18_SpkLen_cm	S13_9595560	13	9595560	0.330461	0.040461	C	T	0.00665188	T	minor	0.00665188
Crk18_SpkLen_cm	S13_17051098	13	17051098	-0.109293	0.064998	A	G	0.109756	A	major	0.890244
Crk18_SpkLen_cm	S13_29748874	13	29748874	-0.0324016	0.00098397	G	A	0.018847	A	minor	0.018847
Crk18_SpkLen_cm	S13_51976779	13	51976779	-0.0505355	0.0346771	T	A	0.488914	A	minor	0.488914
Crk18_SpkLen_cm	S13_58962015	13	58962015	-0.343807	0.133115	G	A	0.0210643	A	minor	0.0210643
Crk18_SpkLen_cm	S13_134782913	13	134782913	-0.678114	0.183458	C	T	0.00776053	C	major	0.992239
Crk18_SpkLen_cm	S13_135391210	13	135391210	-0.350897	0.0790149	C	T	0.0121951	C	major	0.987805
Crk18_SpkLen_cm	S13_209539816	13	209539816	-0.11396	0.0145972	C	G	0.0210643	C	major	0.978936
Crk18_SpkLen_cm	S13_222536639	13	222536639	0.541457	0.153202	G	A	0.00997783	G	major	0.990022
Crk18_SpkLen_cm	S13_245158348	13	245158348	0.0613818	0.00368995	G	C	0.018847	G	major	0.981153
Crk18_SpkLen_cm	S13_248290754	13	248290754	0.164796	0.188159	A	G	0.145233	G	minor	0.145233
Crk18_SpkLen_cm	S13_252462690	13	252462690	-0.12318	0.136798	G	C	0.2051	C	minor	0.2051
Crk18_SpkLen_cm	S13_265039502	13	265039502	1.55151	0.965318	A	G	0.00776053	G	minor	0.00776053
Crk18_SpkLen_cm	S13_273891126	13	273891126	0.00286969	4.89662e-06	G	C	0.0110865	G	major	0.988914
Crk18_SpkLen_cm	S14_76804610	14	76804610	-0.475021	2.22578	C	T	0.233925	C	major	0.766075
Crk18_SpkLen_cm	S14_159035766	14	159035766	0.355681	0.0800203	C	T	0.0121951	T	minor	0.0121951
Crk18_SpkLen_cm	S14_224203729	14	224203729	-0.0402657	0.00134785	A	G	0.0155211	A	major	0.984479
Crk18_SpkLen_cm	S14_234445278	14	234445278	-0.302442	1.19597	G	A	0.372506	A	minor	0.372506
Crk18_SpkLen_cm	S14_326710436	14	326710436	-0.591737	1.14304	G	A	0.0620843	A	minor	0.0620843
Crk18_SpkLen_cm	S14_496475519	14	496475519	-0.269739	0.0447114	C	A	0.0110865	A	minor	0.0110865
Crk18_SpkLen_cm	S15_349866048	15	349866048	0.386377	0.347364	G	C	0.104213	G	major	0.895787
Crk18_SpkLen_cm	S15_374356928	15	374356928	-0.483166	0.200219	C	T	0.0155211	C	major	0.984479
Crk18_SpkLen_cm	S15_387961489	15	387961489	0.287155	0.0305601	G	A	0.00665188	G	major	0.993348
Crk18_SpkLen_cm	S15_412358042	15	412358042	0.0256782	0.00741479	T	G	0.282705	T	major	0.717295
Crk18_SpkLen_cm	S15_566727557	15	566727557	-0.276578	0.0393832	A	C	0.00997783	A	major	0.990022
Crk18_SpkLen_cm	S15_582877307	15	582877307	0.771742	1.46656	T	G	0.0487805	T	major	0.95122
Crk18_SpkLen_cm	S15_600918584	15	600918584	0.185287	0.363549	C	T	0.25388	T	minor	0.25388
Crk18_SpkLen_cm	S16_31792648	16	31792648	0.12849	0.0155967	T	C	0.018847	T	major	0.981153
Crk18_SpkLen_cm	S16_229832414	16	229832414	-0.149343	0.0370938	G	A	0.0731707	A	minor	0.0731707
Crk18_SpkLen_cm	S16_242132329	16	242132329	0.11605	0.184881	C	G	0.480044	G	minor	0.480044
Crk18_SpkLen_cm	S16_263001852	16	263001852	0.161698	0.120008	G	A	0.094235	G	major	0.905765
Crk18_SpkLen_cm	S16_296781475	16	296781475	0.177491	0.0700635	G	A	0.0986696	G	major	0.90133
Crk18_SpkLen_cm	S16_336657077	16	336657077	0.170447	0.389569	T	A	0.411308	T	major	0.588692
Crk18_SpkLen_cm	S16_336657091	16	336657091	-0.0956467	0.0952944	A	C	0.247228	A	major	0.752772
Crk18_SpkLen_cm	S16_399342247	16	399342247	-1.00903	0.742409	C	T	0.0133038	C	major	0.986696
Crk18_SpkLen_cm	S17_108653775	17	108653775	-0.146693	0.0476672	T	C	0.0964523	C	minor	0.0964523
Crk18_SpkLen_cm	S17_108653809	17	108653809	0.196155	0.0846687	C	T	0.0953437	T	minor	0.0953437
Crk18_SpkLen_cm	S17_239233309	17	239233309	-0.372357	0.313874	C	T	0.103104	C	major	0.896896
Crk18_SpkLen_cm	S17_286648169	17	286648169	0.900665	0.488619	T	C	0.0110865	T	major	0.988914
Crk18_SpkLen_cm	S18_31933921	18	31933921	0.0706509	0.0101245	C	T	0.037694	T	minor	0.037694
Crk18_SpkLen_cm	S18_62374700	18	62374700	-0.27325	0.136584	G	A	0.0343681	A	minor	0.0343681
Crk18_SpkLen_cm	S18_75576716	18	75576716	-0.0966324	0.00963256	T	C	0.0199557	C	minor	0.0199557
Crk18_SpkLen_cm	S18_112460873	18	112460873	-0.950338	1.40686	G	A	0.0609756	A	minor	0.0609756
Crk18_SpkLen_cm	S18_182594987	18	182594987	0.363275	0.266902	G	T	0.0842572	T	minor	0.0842572
Crk18_SpkLen_cm	S18_412960071	18	412960071	-0.382108	0.328064	A	G	0.0964523	A	major	0.903548
Crk18_SpkLen_cm	S18_426508862	18	426508862	-1.20696	0.528274	G	T	0.00665188	G	major	0.993348
Crk18_SpkLen_cm	S18_482517030	18	482517030	-0.000670714	7.14425e-07	G	A	0.0620843	A	minor	0.0620843
Crk18_SpkLen_cm	S18_545444320	18	545444320	-0.746108	0.996222	G	A	0.0764967	A	minor	0.0764967
Crk18_SpkLen_cm	S19_70012848	19	70012848	-0.143315	0.0347438	G	A	0.0676275	A	minor	0.0676275
Crk18_SpkLen_cm	S19_124074654	19	124074654	0.0212089	0.0043574	G	A	0.221729	G	major	0.778271
Crk18_SpkLen_cm	S19_543224680	19	543224680	1.17089	1.34934	A	C	0.018847	C	minor	0.018847
Crk18_SpkLen_cm	S19_551502245	19	551502245	-1.42802	0.314678	C	A	0.00332594	A	minor	0.00332594
Crk18_SpkLen_cm	S19_634869001	19	634869001	-0.360019	1.61348	T	C	0.333703	C	minor	0.333703
Crk18_SpkLen_cm	S19_677800667	19	677800667	-0.462195	0.534608	T	A	0.0964523	A	minor	0.0964523
Crk18_SpkLen_cm	S19_692361944	19	692361944	-0.0218103	0.00117022	G	T	0.0920177	G	major	0.907982
Crk18_SpkLen_cm	S19_736363601	19	736363601	0.23715	0.587885	C	G	0.344789	G	minor	0.344789
Crk18_SpkLen_cm	S20_35656076	20	35656076	-0.00719434	0.00044776	G	T	0.194013	G	major	0.805987
Crk18_SpkLen_cm	S20_89189834	20	89189834	-0.109621	0.00626903	A	G	0.00997783	A	major	0.990022
Crk18_SpkLen_cm	S20_148333930	20	148333930	-0.612559	0.801454	C	A	0.0909091	A	minor	0.0909091
Crk18_SpkLen_cm	S20_158929692	20	158929692	0.65466	0.158979	A	G	0.00665188	G	minor	0.00665188
Crk18_SpkLen_cm	S20_339143703	20	339143703	0.121883	0.0352383	G	A	0.104213	G	major	0.895787
Crk18_SpkLen_cm	S20_404723936	20	404723936	0.455365	0.0768356	A	T	0.00665188	T	minor	0.00665188
Crk18_SpkLen_cm	S20_405356717	20	405356717	-0.0376152	0.0194558	T	A	0.464523	A	minor	0.464523
Crk18_SpkLen_cm	S20_488953056	20	488953056	-0.476942	0.200076	C	G	0.0166297	C	major	0.98337
Crk18_SpkLen_cm	S20_580880025	20	580880025	0.167492	0.0169045	A	G	0.0110865	G	minor	0.0110865
Crk18_SpkLen_cm	S20_603356555	20	603356555	0.291921	0.12482	A	C	0.0277162	C	minor	0.0277162
Crk18_SpkLen_cm	S21_66129792	21	66129792	-0.423224	0.085937	C	G	0.00886918	C	major	0.991131
Crk18_SpkLen_cm	S21_86037764	21	86037764	-0.176401	0.198178	T	C	0.13082	C	minor	0.13082
Crk18_SpkLen_cm	S21_90650201	21	90650201	-0.0164903	0.00357147	T	C	0.378049	C	minor	0.378049
Crk18_SpkLen_cm	S21_90762051	21	90762051	0.718021	0.142076	T	C	0.00554324	T	major	0.994457
Crk18_SpkLen_cm	S21_118538093	21	118538093	0.102334	0.00771479	G	A	0.0133038	G	major	0.986696
Crk18_SpkLen_cm	S21_187878445	21	187878445	-0.496161	0.0683433	T	A	0.00554324	A	minor	0.00554324
Crk18_SpkLen_cm	S21_202424506	21	202424506	-0.30921	0.0266111	G	A	0.00554324	A	minor	0.00554324
Crk18_SpkLen_cm	S21_411630228	21	411630228	-1.42055	0.492606	C	T	0.00443459	C	major	0.995565
Crk18_SpkLen_cm	S21_440793454	21	440793454	-1.34223	0.223647	C	T	0.0022173	C	major	0.997783
Crk18_Spklt_num	S01_29528910	1	29528910	-0.35821	0.309526	G	A	0.0365854	A	minor	0.0365854
Crk18_Spklt_num	S01_425640986	1	425640986	-0.0550096	0.00107891	C	G	0.00554324	C	major	0.994457
Crk18_Spklt_num	S01_440284589	1	440284589	-0.222274	0.0245982	G	C	0.00776053	C	minor	0.00776053
Crk18_Spklt_num	S01_441127557	1	441127557	-0.461916	0.067193	G	C	0.00443459	C	minor	0.00443459
Crk18_Spklt_num	S01_448040019	1	448040019	-0.30672	0.255236	G	A	0.0388027	A	minor	0.0388027
Crk18_Spklt_num	S02_21200739	2	21200739	0.351747	0.0642407	C	T	0.00776053	T	minor	0.00776053
Crk18_Spklt_num	S02_86294469	2	86294469	-0.14216	0.304744	A	G	0.332594	A	major	0.667406
Crk18_Spklt_num	S02_110750907	2	110750907	0.0746235	0.0825928	C	T	0.329268	T	minor	0.329268
Crk18_Spklt_num	S02_120531680	2	120531680	-0.423511	0.371849	A	T	0.0676275	A	major	0.932373
Crk18_Spklt_num	S02_132955695	2	132955695	0.341239	0.113791	A	G	0.0144124	G	minor	0.0144124
Crk18_Spklt_num	S02_143430838	2	143430838	0.325569	0.199873	C	T	0.0643016	T	minor	0.0643016
Crk18_Spklt_num	S02_163841443	2	163841443	-0.548154	0.82164	A	G	0.094235	A	major	0.905765
Crk18_Spklt_num	S02_280450209	2	280450209	1.46547	1.03295	G	A	0.00665188	G	major	0.993348
Crk18_Spklt_num	S02_327466245	2	327466245	-0.335761	0.0720342	C	T	0.00886918	C	major	0.991131
Crk18_Spklt_num	S02_403257803	2	403257803	-0.879034	1.865	T	G	0.0831486	G	minor	0.0831486
Crk18_Spklt_num	S03_58073504	3	58073504	-0.140175	0.269932	G	A	0.338137	A	minor	0.338137
Crk18_Spklt_num	S03_290939373	3	290939373	-0.0733842	0.00742893	G	A	0.0199557	A	minor	0.0199557
Crk18_Spklt_num	S03_337625064	3	337625064	0.0817064	0.109451	T	G	0.431264	T	major	0.568736
Crk18_Spklt_num	S03_354805182	3	354805182	-0.114382	0.030964	C	A	0.0332594	A	minor	0.0332594
Crk18_Spklt_num	S03_407190205	3	407190205	-0.490579	0.700033	A	G	0.104213	A	major	0.895787
Crk18_Spklt_num	S03_431611782	3	431611782	-0.241355	0.0373583	T	A	0.00886918	A	minor	0.00886918
Crk18_Spklt_num	S03_477602723	3	477602723	0.558312	0.433145	A	C	0.0210643	C	minor	0.0210643
Crk18_Spklt_num	S04_5654320	4	5654320	0.202042	0.699582	G	C	0.435698	G	major	0.564302
Crk18_Spklt_num	S04_31032972	4	31032972	-1.4621	2.05844	G	A	0.0144124	A	minor	0.0144124
Crk18_Spklt_num	S04_35525008	4	35525008	-0.495127	0.342566	C	A	0.0210643	A	minor	0.0210643
Crk18_Spklt_num	S04_48117627	4	48117627	0.336387	1.0387	A	G	0.161863	G	minor	0.161863
Crk18_Spklt_num	S04_99870528	4	99870528	-0.307882	0.0301378	C	T	0.00443459	C	major	0.995565
Crk18_Spklt_num	S04_103131373	4	103131373	-0.849697	1.00531	T	A	0.0210643	A	minor	0.0210643
Crk18_Spklt_num	S04_119394068	4	119394068	0.505	0.477805	A	C	0.0277162	C	minor	0.0277162
Crk18_Spklt_num	S04_137847829	4	137847829	-1.07914	1.59278	T	C	0.0210643	C	minor	0.0210643
Crk18_Spklt_num	S04_199697392	4	199697392	1.29129	0.572968	G	T	0.00554324	T	minor	0.00554324
Crk18_Spklt_num	S04_220130053	4	220130053	-0.895139	0.565429	G	A	0.0121951	A	minor	0.0121951
Crk18_Spklt_num	S04_239757520	4	239757520	-0.0732099	0.0143384	G	A	0.094235	A	minor	0.094235
Crk18_Spklt_num	S04_261858888	4	261858888	0.612439	1.12468	G	A	0.103104	G	major	0.896896
Crk18_Spklt_num	S05_57840749	5	57840749	0.0413979	0.0013893	T	C	0.0121951	T	major	0.987805
Crk18_Spklt_num	S05_366528709	5	366528709	-0.13852	0.303944	A	G	0.455654	A	major	0.544346
Crk18_Spklt_num	S05_397289341	5	397289341	-1.29867	0.26579	G	A	0.0022173	A	minor	0.0022173
Crk18_Spklt_num	S06_27073124	6	27073124	0.937626	0.70608	C	T	0.0121951	T	minor	0.0121951
Crk18_Spklt_num	S06_30049280	6	30049280	0.796886	1.78387	A	C	0.101996	C	minor	0.101996
Crk18_Spklt_num	S06_166357566	6	166357566	-0.761996	0.205714	G	A	0.00554324	A	minor	0.00554324
Crk18_Spklt_num	S06_347530512	6	347530512	0.0646178	0.00354782	G	A	0.0121951	G	major	0.987805
Crk18_Spklt_num	S06_373070997	6	373070997	-0.523471	0.424543	G	A	0.0221729	A	minor	0.0221729
Crk18_Spklt_num	S06_480699953	6	480699953	0.291469	0.0408747	A	T	0.00665188	T	minor	0.00665188
Crk18_Spklt_num	S06_510179340	6	510179340	-0.0551336	0.0476664	A	G	0.455654	A	major	0.544346
Crk18_Spklt_num	S06_518578819	6	518578819	-0.149436	0.350582	C	G	0.422395	C	major	0.577605
Crk18_Spklt_num	S06_568793265	6	568793265	0.240712	0.978693	G	A	0.424612	G	major	0.575388
Crk18_Spklt_num	S07_12079084	7	12079084	-0.228936	0.216758	A	G	0.0654102	A	major	0.93459
Crk18_Spklt_num	S07_91555077	7	91555077	1.24028	1.48084	C	T	0.0144124	T	minor	0.0144124
Crk18_Spklt_num	S07_103055343	7	103055343	0.622686	0.827236	C	G	0.0687361	G	minor	0.0687361
Crk18_Spklt_num	S07_156597465	7	156597465	-0.424875	0.122128	C	T	0.00997783	C	major	0.990022
Crk18_Spklt_num	S07_226848353	7	226848353	-0.893314	1.79214	G	A	0.0742794	A	minor	0.0742794
Crk18_Spklt_num	S07_516499740	7	516499740	-0.038512	0.0243285	A	G	0.440133	A	major	0.559867
Crk18_Spklt_num	S08_67484386	8	67484386	0.067901	0.00451675	A	G	0.0144124	G	minor	0.0144124
Crk18_Spklt_num	S08_121556108	8	121556108	-0.52974	0.790153	C	T	0.0986696	C	major	0.90133
Crk18_Spklt_num	S08_197291732	8	197291732	0.549546	0.694331	C	T	0.0731707	T	minor	0.0731707
Crk18_Spklt_num	S08_324506204	8	324506204	0.351816	0.32509	A	G	0.0898004	G	minor	0.0898004
Crk18_Spklt_num	S08_425968180	8	425968180	-0.122013	0.233651	C	G	0.371397	C	major	0.628603
Crk18_Spklt_num	S09_61869885	9	61869885	0.170195	0.213226	G	C	0.117517	G	major	0.882483
Crk18_Spklt_num	S09_315677404	9	315677404	-0.94933	2.36495	C	A	0.0886918	A	minor	0.0886918
Crk18_Spklt_num	S09_385133100	9	385133100	-0.00234813	4.64804e-05	G	A	0.140798	A	minor	0.140798
Crk18_Spklt_num	S09_415851589	9	415851589	-0.0425644	0.00430628	C	T	0.0853659	C	major	0.914634
Crk18_Spklt_num	S10_10944243	10	10944243	-0.20131	0.0462211	G	A	0.0166297	A	minor	0.0166297
Crk18_Spklt_num	S10_62112342	10	62112342	0.0749509	0.0874799	T	C	0.365854	T	major	0.634146
Crk18_Spklt_num	S10_120456859	10	120456859	0.382988	0.289633	G	A	0.059867	G	major	0.940133
Crk18_Spklt_num	S10_447491711	10	447491711	-0.0956482	0.00325802	A	G	0.00554324	A	major	0.994457
Crk18_Spklt_num	S10_459839942	10	459839942	0.661726	0.849186	G	T	0.0609756	T	minor	0.0609756
Crk18_Spklt_num	S10_463199055	10	463199055	0.0792149	0.00102289	A	C	0.0022173	C	minor	0.0022173
Crk18_Spklt_num	S11_6019252	11	6019252	0.359787	2.12895	G	A	0.471175	G	major	0.528825
Crk18_Spklt_num	S11_52972239	11	52972239	0.789931	1.03528	C	G	0.0254989	G	minor	0.0254989
Crk18_Spklt_num	S11_59775443	11	59775443	0.328589	0.427175	C	T	0.0609756	T	minor	0.0609756
Crk18_Spklt_num	S11_161626009	11	161626009	0.745637	0.188569	A	G	0.00554324	G	minor	0.00554324
Crk18_Spklt_num	S11_191637589	11	191637589	-0.511706	0.0525787	T	C	0.00332594	C	minor	0.00332594
Crk18_Spklt_num	S11_211702566	11	211702566	1.25746	1.88442	C	A	0.0210643	C	major	0.978936
Crk18_Spklt_num	S11_227848416	11	227848416	0.895658	0.259868	G	A	0.00443459	G	major	0.995565
Crk18_Spklt_num	S11_235603452	11	235603452	0.122186	0.247789	G	A	0.491131	G	major	0.508869
Crk18_Spklt_num	S11_241092955	11	241092955	0.199354	0.650482	T	A	0.411308	T	major	0.588692
Crk18_Spklt_num	S12_25712846	12	25712846	-0.193446	0.531675	C	T	0.284922	C	major	0.715078
Crk18_Spklt_num	S12_87898328	12	87898328	0.121037	0.0347111	A	G	0.0798226	G	minor	0.0798226
Crk18_Spklt_num	S13_9159276	13	9159276	0.701445	0.177143	G	A	0.00554324	G	major	0.994457
Crk18_Spklt_num	S13_9595560	13	9595560	-1.13968	0.609194	C	T	0.00665188	C	major	0.993348
Crk18_Spklt_num	S13_17051098	13	17051098	-0.0325406	0.00697384	A	G	0.109756	A	major	0.890244
Crk18_Spklt_num	S13_29748874	13	29748874	-0.879609	0.891446	G	A	0.018847	A	minor	0.018847
Crk18_Spklt_num	S13_51976779	13	51976779	-0.266917	1.20355	T	A	0.488914	A	minor	0.488914
Crk18_Spklt_num	S13_58962015	13	58962015	-0.277539	0.110035	G	A	0.0210643	A	minor	0.0210643
Crk18_Spklt_num	S13_134782913	13	134782913	0.593462	0.174328	C	T	0.00776053	T	minor	0.00776053
Crk18_Spklt_num	S13_135391210	13	135391210	0.487761	0.190677	C	T	0.0121951	T	minor	0.0121951
Crk18_Spklt_num	S13_209539816	13	209539816	0.147066	0.0307941	C	G	0.0210643	G	minor	0.0210643
Crk18_Spklt_num	S13_222536639	13	222536639	-0.72467	0.346756	G	A	0.00997783	A	minor	0.00997783
Crk18_Spklt_num	S13_245158348	13	245158348	-0.573604	0.412928	G	C	0.018847	C	minor	0.018847
Crk18_Spklt_num	S13_248290754	13	248290754	0.27716	0.664325	A	G	0.145233	G	minor	0.145233
Crk18_Spklt_num	S13_252462690	13	252462690	-0.15099	0.262567	G	C	0.2051	C	minor	0.2051
Crk18_Spklt_num	S13_265039502	13	265039502	0.589289	0.179422	A	G	0.00776053	G	minor	0.00776053
Crk18_Spklt_num	S13_273891126	13	273891126	-0.708598	0.378862	G	C	0.0110865	C	minor	0.0110865
Crk18_Spklt_num	S14_76804610	14	76804610	-0.205899	0.52987	C	T	0.233925	C	major	0.766075
Crk18_Spklt_num	S14_159035766	14	159035766	-0.728856	0.429957	C	T	0.0121951	C	major	0.987805
Crk18_Spklt_num	S14_224203729	14	224203729	-0.728468	0.566584	A	G	0.0155211	A	major	0.984479
Crk18_Spklt_num	S14_234445278	14	234445278	-0.229759	0.855361	G	A	0.372506	A	minor	0.372506
Crk18_Spklt_num	S14_326710436	14	326710436	-0.250721	0.262501	G	A	0.0620843	A	minor	0.0620843
Crk18_Spklt_num	S14_496475519	14	496475519	0.357395	0.100684	C	A	0.0110865	C	major	0.988914
Crk18_Spklt_num	S15_349866048	15	349866048	-0.763121	1.70213	G	C	0.104213	C	minor	0.104213
Crk18_Spklt_num	S15_374356928	15	374356928	-1.03085	1.17937	C	T	0.0155211	C	major	0.984479
Crk18_Spklt_num	S15_387961489	15	387961489	0.708087	0.238887	G	A	0.00665188	G	major	0.993348
Crk18_Spklt_num	S15_412358042	15	412358042	0.0359013	0.0177156	T	G	0.282705	T	major	0.717295
Crk18_Spklt_num	S15_566727557	15	566727557	0.662893	0.290093	A	C	0.00997783	C	minor	0.00997783
Crk18_Spklt_num	S15_582877307	15	582877307	0.348418	0.378098	T	G	0.0487805	T	major	0.95122
Crk18_Spklt_num	S15_600918584	15	600918584	-0.170249	0.383268	C	T	0.25388	C	major	0.74612
Crk18_Spklt_num	S16_31792648	16	31792648	-0.436761	0.231164	T	C	0.018847	C	minor	0.018847
Crk18_Spklt_num	S16_229832414	16	229832414	0.584988	0.71529	G	A	0.0731707	G	major	0.926829
Crk18_Spklt_num	S16_242132329	16	242132329	-0.459793	3.38563	C	G	0.480044	C	major	0.519956
Crk18_Spklt_num	S16_263001852	16	263001852	0.011362	0.00074606	G	A	0.094235	G	major	0.905765
Crk18_Spklt_num	S16_296781475	16	296781475	-0.703154	1.30438	G	A	0.0986696	A	minor	0.0986696
Crk18_Spklt_num	S16_336657077	16	336657077	-0.0565454	0.0541105	T	A	0.411308	A	minor	0.411308
Crk18_Spklt_num	S16_336657091	16	336657091	-0.0994779	0.129055	A	C	0.247228	A	major	0.752772
Crk18_Spklt_num	S16_399342247	16	399342247	-0.528733	0.257575	C	T	0.0133038	C	major	0.986696
Crk18_Spklt_num	S17_108653775	17	108653775	-0.343614	0.322039	T	C	0.0964523	C	minor	0.0964523
Crk18_Spklt_num	S17_108653809	17	108653809	0.295732	0.236746	C	T	0.0953437	T	minor	0.0953437
Crk18_Spklt_num	S17_239233309	17	239233309	0.441805	0.532784	C	T	0.103104	T	minor	0.103104
Crk18_Spklt_num	S17_286648169	17	286648169	-0.773626	0.451331	T	C	0.0110865	C	minor	0.0110865
Crk18_Spklt_num	S18_31933921	18	31933921	0.364837	0.352955	C	T	0.037694	T	minor	0.037694
Crk18_Spklt_num	S18_62374700	18	62374700	-0.493981	0.574689	G	A	0.0343681	A	minor	0.0343681
Crk18_Spklt_num	S18_75576716	18	75576716	-0.544699	0.377871	T	C	0.0199557	C	minor	0.0199557
Crk18_Spklt_num	S18_112460873	18	112460873	0.00905303	0.000160301	G	A	0.0609756	G	major	0.939024
Crk18_Spklt_num	S18_182594987	18	182594987	0.946571	2.28184	G	T	0.0842572	T	minor	0.0842572
Crk18_Spklt_num	S18_412960071	18	412960071	0.595839	0.986167	A	G	0.0964523	G	minor	0.0964523
Crk18_Spklt_num	S18_426508862	18	426508862	0.936625	0.387632	G	T	0.00665188	T	minor	0.00665188
Crk18_Spklt_num	S18_482517030	18	482517030	1.15498	2.6387	G	A	0.0620843	G	major	0.937916
Crk18_Spklt_num	S18_545444320	18	545444320	0.720882	1.15913	G	A	0.0764967	G	major	0.923503
Crk18_Spklt_num	S19_70012848	19	70012848	-0.792741	1.32198	G	A	0.0676275	A	minor	0.0676275
Crk18_Spklt_num	S19_124074654	19	124074654	0.095226	0.108423	G	A	0.221729	G	major	0.778271
Crk18_Spklt_num	S19_543224680	19	543224680	0.460612	0.268188	A	C	0.018847	C	minor	0.018847
Crk18_Spklt_num	S19_551502245	19	551502245	0.387904	0.0298213	C	A	0.00332594	C	major	0.996674
Crk18_Spklt_num	S19_634869001	19	634869001	-0.11059	0.187505	T	C	0.333703	C	minor	0.333703
Crk18_Spklt_num	S19_677800667	19	677800667	0.764175	1.82003	T	A	0.0964523	T	major	0.903548
Crk18_Spklt_num	S19_692361944	19	692361944	-0.494768	0.760153	G	T	0.0920177	G	major	0.907982
Crk18_Spklt_num	S19_736363601	19	736363601	0.284023	1.07666	C	G	0.344789	G	minor	0.344789
Crk18_Spklt_num	S20_35656076	20	35656076	0.0711087	0.0539836	G	T	0.194013	T	minor	0.194013
Crk18_Spklt_num	S20_89189834	20	89189834	-0.587333	0.228746	A	G	0.00997783	A	major	0.990022
Crk18_Spklt_num	S20_148333930	20	148333930	0.492792	0.65492	C	A	0.0909091	C	major	0.909091
Crk18_Spklt_num	S20_158929692	20	158929692	-0.792352	0.303147	A	G	0.00665188	A	major	0.993348
Crk18_Spklt_num	S20_339143703	20	339143703	-0.294709	0.259174	G	A	0.104213	A	minor	0.104213
Crk18_Spklt_num	S20_404723936	20	404723936	-0.242941	0.0285526	A	T	0.00665188	A	major	0.993348
Crk18_Spklt_num	S20_405356717	20	405356717	0.089753	0.139552	T	A	0.464523	T	major	0.535477
Crk18_Spklt_num	S20_488953056	20	488953056	-1.192	1.59656	C	G	0.0166297	C	major	0.98337
Crk18_Spklt_num	S20_580880025	20	580880025	-0.0516237	0.00207401	A	G	0.0110865	A	major	0.988914
Crk18_Spklt_num	S20_603356555	20	603356555	0.607673	0.67815	A	C	0.0277162	C	minor	0.0277162
Crk18_Spklt_num	S21_66129792	21	66129792	-0.60976	0.229299	C	G	0.00886918	C	major	0.991131
Crk18_Spklt_num	S21_86037764	21	86037764	0.0388821	0.0118389	T	C	0.13082	T	major	0.86918
Crk18_Spklt_num	S21_90650201	21	90650201	-0.0683702	0.0773762	T	C	0.378049	C	minor	0.378049
Crk18_Spklt_num	S21_90762051	21	90762051	-0.745637	0.188569	T	C	0.00554324	C	minor	0.00554324
Crk18_Spklt_num	S21_118538093	21	118538093	-0.304871	0.0866151	G	A	0.0133038	A	minor	0.0133038
Crk18_Spklt_num	S21_187878445	21	187878445	0.181547	0.0114432	T	A	0.00554324	T	major	0.994457
Crk18_Spklt_num	S21_202424506	21	202424506	1.01026	0.364358	G	A	0.00554324	G	major	0.994457
Crk18_Spklt_num	S21_411630228	21	411630228	0.696933	0.146607	C	T	0.00443459	T	minor	0.00443459
Crk18_Spklt_num	S21_440793454	21	440793454	-3.70122	2.17903	C	T	0.0022173	C	major	0.997783
Crk18_SpkWt_g	S01_29528910	1	29528910	-0.0273313	0.487401	G	A	0.0365854	A	minor	0.0365854
Crk18_SpkWt_g	S01_425640986	1	425640986	0.0157527	0.0240307	C	G	0.00554324	G	minor	0.00554324
Crk18_SpkWt_g	S01_440284589	1	440284589	0.0397931	0.213338	G	C	0.00776053	G	major	0.992239
Crk18_SpkWt_g	S01_441127557	1	441127557	0.0342898	0.100463	G	C	0.00443459	G	major	0.995565
Crk18_SpkWt_g	S01_448040019	1	448040019	0.0278677	0.573378	G	A	0.0388027	G	major	0.961197
Crk18_SpkWt_g	S02_21200739	2	21200739	0.00649509	0.00595112	C	T	0.00776053	T	minor	0.00776053
Crk18_SpkWt_g	S02_86294469	2	86294469	0.00216821	0.0191379	A	G	0.332594	G	minor	0.332594
Crk18_SpkWt_g	S02_110750907	2	110750907	-0.00211681	0.0179496	C	T	0.329268	C	major	0.670732
Crk18_SpkWt_g	S02_120531680	2	120531680	0.0147471	0.122122	A	T	0.0676275	T	minor	0.0676275
Crk18_SpkWt_g	S02_132955695	2	132955695	0.0261681	0.181562	A	G	0.0144124	G	minor	0.0144124
Crk18_SpkWt_g	S02_143430838	2	143430838	-0.015434	0.121562	C	T	0.0643016	C	major	0.935698
Crk18_SpkWt_g	S02_163841443	2	163841443	0.0210794	0.328724	A	G	0.094235	G	minor	0.094235
Crk18_SpkWt_g	S02_280450209	2	280450209	0.0467326	0.285449	G	A	0.00665188	G	major	0.993348
Crk18_SpkWt_g	S02_327466245	2	327466245	-0.0113389	0.0223187	C	T	0.00886918	C	major	0.991131
Crk18_SpkWt_g	S02_403257803	2	403257803	-0.0215892	0.304299	T	G	0.0831486	G	minor	0.0831486
Crk18_SpkWt_g	S03_58073504	3	58073504	0.0174264	1.12755	G	A	0.338137	G	major	0.661863
Crk18_SpkWt_g	S03_290939373	3	290939373	-0.0530842	1.05367	G	A	0.0199557	A	minor	0.0199557
Crk18_SpkWt_g	S03_337625064	3	337625064	-0.016412	1.19407	T	G	0.431264	G	minor	0.431264
Crk18_SpkWt_g	S03_354805182	3	354805182	0.00117019	0.000881373	C	A	0.0332594	C	major	0.966741
Crk18_SpkWt_g	S03_407190205	3	407190205	0.0248385	0.485946	A	G	0.104213	G	minor	0.104213
Crk18_SpkWt_g	S03_431611782	3	431611782	0.0489779	0.418279	T	A	0.00886918	T	major	0.991131
Crk18_SpkWt_g	S03_477602723	3	477602723	0.0371392	0.519906	A	C	0.0210643	C	minor	0.0210643
Crk18_SpkWt_g	S04_5654320	4	5654320	-0.00528025	0.129297	G	C	0.435698	C	minor	0.435698
Crk18_SpkWt_g	S04_31032972	4	31032972	-0.0406363	0.430735	G	A	0.0144124	A	minor	0.0144124
Crk18_SpkWt_g	S04_35525008	4	35525008	0.0123746	0.0579045	C	A	0.0210643	C	major	0.978936
Crk18_SpkWt_g	S04_48117627	4	48117627	0.0216483	1.16169	A	G	0.161863	G	minor	0.161863
Crk18_SpkWt_g	S04_99870528	4	99870528	0.0578078	0.288665	C	T	0.00443459	T	minor	0.00443459
Crk18_SpkWt_g	S04_103131373	4	103131373	-0.0364009	0.499276	T	A	0.0210643	A	minor	0.0210643
Crk18_SpkWt_g	S04_119394068	4	119394068	-0.00580357	0.0171029	A	C	0.0277162	A	major	0.972284
Crk18_SpkWt_g	S04_137847829	4	137847829	-0.0183245	0.124127	T	C	0.0210643	C	minor	0.0210643
Crk18_SpkWt_g	S04_199697392	4	199697392	-0.040388	0.151728	G	T	0.00554324	G	major	0.994457
Crk18_SpkWt_g	S04_220130053	4	220130053	0.0540135	0.5563	G	A	0.0121951	G	major	0.987805
Crk18_SpkWt_g	S04_239757520	4	239757520	0.0114737	0.0952807	G	A	0.094235	G	major	0.905765
Crk18_SpkWt_g	S04_261858888	4	261858888	0.00514065	0.0215172	G	A	0.103104	G	major	0.896896
Crk18_SpkWt_g	S05_57840749	5	57840749	0.0146067	0.0468518	T	C	0.0121951	T	major	0.987805
Crk18_SpkWt_g	S05_366528709	5	366528709	0.0120374	0.619593	A	G	0.455654	G	minor	0.455654
Crk18_SpkWt_g	S05_397289341	5	397289341	-0.0956185	0.390849	G	A	0.0022173	A	minor	0.0022173
Crk18_SpkWt_g	S06_27073124	6	27073124	0.0617687	0.829645	C	T	0.0121951	T	minor	0.0121951
Crk18_SpkWt_g	S06_30049280	6	30049280	0.00257548	0.00503639	A	C	0.101996	C	minor	0.101996
Crk18_SpkWt_g	S06_166357566	6	166357566	-0.0814022	0.636732	G	A	0.00554324	A	minor	0.00554324
Crk18_SpkWt_g	S06_347530512	6	347530512	5.4e-05	6.74457e-07	G	A	0.0121951	G	major	0.987805
Crk18_SpkWt_g	S06_373070997	6	373070997	-0.0639096	1.71645	G	A	0.0221729	A	minor	0.0221729
Crk18_SpkWt_g	S06_480699953	6	480699953	-0.026132	0.0892628	A	T	0.00665188	A	major	0.993348
Crk18_SpkWt_g	S06_510179340	6	510179340	0.00156571	0.0103821	A	G	0.455654	G	minor	0.455654
Crk18_SpkWt_g	S06_518578819	6	518578819	0.00776957	0.255661	C	G	0.422395	G	minor	0.422395
Crk18_SpkWt_g	S06_568793265	6	568793265	-0.00658643	0.19809	G	A	0.424612	A	minor	0.424612
Crk18_SpkWt_g	S07_12079084	7	12079084	-0.0246881	0.683724	A	G	0.0654102	A	major	0.93459
Crk18_SpkWt_g	S07_91555077	7	91555077	0.00409624	0.00437838	C	T	0.0144124	T	minor	0.0144124
Crk18_SpkWt_g	S07_103055343	7	103055343	-0.0129422	0.0966772	C	G	0.0687361	C	major	0.931264
Crk18_SpkWt_g	S07_156597465	7	156597465	-0.0421662	0.327013	C	T	0.00997783	C	major	0.990022
Crk18_SpkWt_g	S07_226848353	7	226848353	0.0189074	0.217328	G	A	0.0742794	G	major	0.925721
Crk18_SpkWt_g	S07_516499740	7	516499740	0.0100064	0.444967	A	G	0.440133	G	minor	0.440133
Crk18_SpkWt_g	S08_67484386	8	67484386	-0.00274384	0.00200205	A	G	0.0144124	A	major	0.985588
Crk18_SpkWt_g	S08_121556108	8	121556108	0.0090785	0.0628053	C	T	0.0986696	T	minor	0.0986696
Crk18_SpkWt_g	S08_197291732	8	197291732	-0.015509	0.149987	C	T	0.0731707	C	major	0.926829
Crk18_SpkWt_g	S08_324506204	8	324506204	-0.0162997	0.188907	A	G	0.0898004	A	major	0.9102
Crk18_SpkWt_g	S08_425968180	8	425968180	0.0156454	1.03856	C	G	0.371397	G	minor	0.371397
Crk18_SpkWt_g	S09_61869885	9	61869885	0.00672649	0.0902634	G	C	0.117517	G	major	0.882483
Crk18_SpkWt_g	S09_315677404	9	315677404	-0.00255465	0.00463521	C	A	0.0886918	A	minor	0.0886918
Crk18_SpkWt_g	S09_385133100	9	385133100	0.0101621	0.235597	G	A	0.140798	G	major	0.859202
Crk18_SpkWt_g	S09_415851589	9	415851589	0.0316295	0.643794	C	T	0.0853659	T	minor	0.0853659
Crk18_SpkWt_g	S10_10944243	10	10944243	0.00177378	0.000974493	G	A	0.0166297	G	major	0.98337
Crk18_SpkWt_g	S10_62112342	10	62112342	0.00256643	0.0277431	T	C	0.365854	T	major	0.634146
Crk18_SpkWt_g	S10_120456859	10	120456859	0.0111854	0.0670491	G	A	0.059867	G	major	0.940133
Crk18_SpkWt_g	S10_447491711	10	447491711	0.00297875	0.000857527	A	G	0.00554324	G	minor	0.00554324
Crk18_SpkWt_g	S10_459839942	10	459839942	0.000873609	0.000400906	G	T	0.0609756	T	minor	0.0609756
Crk18_SpkWt_g	S10_463199055	10	463199055	-0.0262474	0.030545	A	C	0.0022173	A	major	0.997783
Crk18_SpkWt_g	S11_6019252	11	6019252	0.0109453	0.530911	G	A	0.471175	G	major	0.528825
Crk18_SpkWt_g	S11_52972239	11	52972239	0.000695883	0.000217434	C	G	0.0254989	G	minor	0.0254989
Crk18_SpkWt_g	S11_59775443	11	59775443	0.0238942	0.611967	C	T	0.0609756	T	minor	0.0609756
Crk18_SpkWt_g	S11_161626009	11	161626009	-0.0486471	0.216918	A	G	0.00554324	A	major	0.994457
Crk18_SpkWt_g	S11_191637589	11	191637589	-0.0110301	0.00663946	T	C	0.00332594	C	minor	0.00332594
Crk18_SpkWt_g	S11_211702566	11	211702566	0.00851358	0.0234658	C	A	0.0210643	C	major	0.978936
Crk18_SpkWt_g	S11_227848416	11	227848416	0.0405146	0.144603	G	A	0.00443459	G	major	0.995565
Crk18_SpkWt_g	S11_235603452	11	235603452	0.00224169	0.0224711	G	A	0.491131	G	major	0.508869
Crk18_SpkWt_g	S11_241092955	11	241092955	0.00180707	0.014425	T	A	0.411308	T	major	0.588692
Crk18_SpkWt_g	S12_25712846	12	25712846	0.00811918	0.253637	C	T	0.284922	T	minor	0.284922
Crk18_SpkWt_g	S12_87898328	12	87898328	-0.00912287	0.0533232	A	G	0.0798226	A	major	0.920177
Crk18_SpkWt_g	S13_9159276	13	9159276	0.0786756	0.605441	G	A	0.00554324	G	major	0.994457
Crk18_SpkWt_g	S13_9595560	13	9595560	-0.039593	0.199264	C	T	0.00665188	C	major	0.993348
Crk18_SpkWt_g	S13_17051098	13	17051098	-0.0269324	1.28942	A	G	0.109756	A	major	0.890244
Crk18_SpkWt_g	S13_29748874	13	29748874	-0.00516362	0.0083036	G	A	0.018847	A	minor	0.018847
Crk18_SpkWt_g	S13_51976779	13	51976779	-0.00986643	0.44506	T	A	0.488914	A	minor	0.488914
Crk18_SpkWt_g	S13_58962015	13	58962015	-0.028292	0.310027	G	A	0.0210643	A	minor	0.0210643
Crk18_SpkWt_g	S13_134782913	13	134782913	-0.0676991	0.613612	C	T	0.00776053	C	major	0.992239
Crk18_SpkWt_g	S13_135391210	13	135391210	-0.0717527	1.11657	C	T	0.0121951	C	major	0.987805
Crk18_SpkWt_g	S13_209539816	13	209539816	0.0351441	0.476582	C	G	0.0210643	G	minor	0.0210643
Crk18_SpkWt_g	S13_222536639	13	222536639	0.0587812	0.618071	G	A	0.00997783	G	major	0.990022
Crk18_SpkWt_g	S13_245158348	13	245158348	0.0367566	0.459981	G	C	0.018847	G	major	0.981153
Crk18_SpkWt_g	S13_248290754	13	248290754	-0.00477796	0.0534236	A	G	0.145233	A	major	0.854767
Crk18_SpkWt_g	S13_252462690	13	252462690	-0.0153352	0.734789	G	C	0.2051	C	minor	0.2051
Crk18_SpkWt_g	S13_265039502	13	265039502	0.000677059	6.42821e-05	A	G	0.00776053	G	minor	0.00776053
Crk18_SpkWt_g	S13_273891126	13	273891126	0.0312939	0.200325	G	C	0.0110865	G	major	0.988914
Crk18_SpkWt_g	S14_76804610	14	76804610	-0.000206097	0.000143852	C	T	0.233925	C	major	0.766075
Crk18_SpkWt_g	S14_159035766	14	159035766	-0.0541948	0.644896	C	T	0.0121951	C	major	0.987805
Crk18_SpkWt_g	S14_224203729	14	224203729	-0.035081	0.356528	A	G	0.0155211	A	major	0.984479
Crk18_SpkWt_g	S14_234445278	14	234445278	-0.00589882	0.152489	G	A	0.372506	A	minor	0.372506
Crk18_SpkWt_g	S14_326710436	14	326710436	-0.0319136	1.15403	G	A	0.0620843	A	minor	0.0620843
Crk18_SpkWt_g	S14_496475519	14	496475519	0.00649401	0.00902181	C	A	0.0110865	C	major	0.988914
Crk18_SpkWt_g	S15_349866048	15	349866048	-0.00349974	0.00969459	G	C	0.104213	C	minor	0.104213
Crk18_SpkWt_g	S15_374356928	15	374356928	-8.04e-05	1.94696e-06	C	T	0.0155211	C	major	0.984479
Crk18_SpkWt_g	S15_387961489	15	387961489	0.0253386	0.0830237	G	A	0.00665188	G	major	0.993348
Crk18_SpkWt_g	S15_412358042	15	412358042	0.0130935	0.636462	T	G	0.282705	T	major	0.717295
Crk18_SpkWt_g	S15_566727557	15	566727557	-0.0376477	0.253909	A	C	0.00997783	A	major	0.990022
Crk18_SpkWt_g	S15_582877307	15	582877307	0.0268487	0.608642	T	G	0.0487805	T	major	0.95122
Crk18_SpkWt_g	S15_600918584	15	600918584	-0.00272636	0.0266108	C	T	0.25388	C	major	0.74612
Crk18_SpkWt_g	S16_31792648	16	31792648	0.0122512	0.0493486	T	C	0.018847	T	major	0.981153
Crk18_SpkWt_g	S16_229832414	16	229832414	0.00497239	0.0139986	G	A	0.0731707	G	major	0.926829
Crk18_SpkWt_g	S16_242132329	16	242132329	-0.0012562	0.00679469	C	G	0.480044	C	major	0.519956
Crk18_SpkWt_g	S16_263001852	16	263001852	-0.000916796	0.00131602	G	A	0.094235	A	minor	0.094235
Crk18_SpkWt_g	S16_296781475	16	296781475	-0.0157834	0.177012	G	A	0.0986696	A	minor	0.0986696
Crk18_SpkWt_g	S16_336657077	16	336657077	0.0100884	0.466654	T	A	0.411308	T	major	0.588692
Crk18_SpkWt_g	S16_336657091	16	336657091	-0.00399392	0.0563169	A	C	0.247228	A	major	0.752772
Crk18_SpkWt_g	S16_399342247	16	399342247	-0.0618446	0.954595	C	T	0.0133038	C	major	0.986696
Crk18_SpkWt_g	S17_108653775	17	108653775	0.0156988	0.181711	T	C	0.0964523	T	major	0.903548
Crk18_SpkWt_g	S17_108653809	17	108653809	-0.0186984	0.255832	C	T	0.0953437	C	major	0.904656
Crk18_SpkWt_g	S17_239233309	17	239233309	-0.0331532	0.809566	C	T	0.103104	C	major	0.896896
Crk18_SpkWt_g	S17_286648169	17	286648169	0.0394934	0.318534	T	C	0.0110865	T	major	0.988914
Crk18_SpkWt_g	S18_31933921	18	31933921	-0.030433	0.667962	C	T	0.037694	C	major	0.962306
Crk18_SpkWt_g	S18_62374700	18	62374700	0.0114929	0.0844173	G	A	0.0343681	G	major	0.965632
Crk18_SpkWt_g	S18_75576716	18	75576716	0.0296523	0.302791	T	C	0.0199557	T	major	0.980044
Crk18_SpkWt_g	S18_112460873	18	112460873	-0.00889823	0.0419596	G	A	0.0609756	A	minor	0.0609756
Crk18_SpkWt_g	S18_182594987	18	182594987	-0.0191107	0.25199	G	T	0.0842572	G	major	0.915743
Crk18_SpkWt_g	S18_412960071	18	412960071	0.000800289	0.000481118	A	G	0.0964523	G	minor	0.0964523
Crk18_SpkWt_g	S18_426508862	18	426508862	-0.0481637	0.276784	G	T	0.00665188	G	major	0.993348
Crk18_SpkWt_g	S18_482517030	18	482517030	-0.0181627	0.176568	G	A	0.0620843	A	minor	0.0620843
Crk18_SpkWt_g	S18_545444320	18	545444320	0.0213905	0.276216	G	A	0.0764967	G	major	0.923503
Crk18_SpkWt_g	S19_70012848	19	70012848	-0.0234109	0.31206	G	A	0.0676275	A	minor	0.0676275
Crk18_SpkWt_g	S19_124074654	19	124074654	0.0165762	0.88851	G	A	0.221729	G	major	0.778271
Crk18_SpkWt_g	S19_543224680	19	543224680	0.0191835	0.126246	A	C	0.018847	C	minor	0.018847
Crk18_SpkWt_g	S19_551502245	19	551502245	-0.0327405	0.0576796	C	A	0.00332594	A	minor	0.00332594
Crk18_SpkWt_g	S19_634869001	19	634869001	-0.00772495	0.247302	T	C	0.333703	C	minor	0.333703
Crk18_SpkWt_g	S19_677800667	19	677800667	0.0182404	0.28066	T	A	0.0964523	T	major	0.903548
Crk18_SpkWt_g	S19_692361944	19	692361944	-0.0101859	0.0873107	G	T	0.0920177	G	major	0.907982
Crk18_SpkWt_g	S19_736363601	19	736363601	0.00933387	0.315498	C	G	0.344789	G	minor	0.344789
Crk18_SpkWt_g	S20_35656076	20	35656076	-0.0072084	0.150033	G	T	0.194013	G	major	0.805987
Crk18_SpkWt_g	S20_89189834	20	89189834	-0.0399749	0.287426	A	G	0.00997783	A	major	0.990022
Crk18_SpkWt_g	S20_148333930	20	148333930	-0.0149264	0.162892	C	A	0.0909091	A	minor	0.0909091
Crk18_SpkWt_g	S20_158929692	20	158929692	0.011408	0.0170799	A	G	0.00665188	G	minor	0.00665188
Crk18_SpkWt_g	S20_339143703	20	339143703	-0.0194613	0.306158	G	A	0.104213	A	minor	0.104213
Crk18_SpkWt_g	S20_404723936	20	404723936	-0.0546736	0.393079	A	T	0.00665188	A	major	0.993348
Crk18_SpkWt_g	S20_405356717	20	405356717	0.00520734	0.127263	T	A	0.464523	T	major	0.535477
Crk18_SpkWt_g	S20_488953056	20	488953056	-0.0311201	0.295162	C	G	0.0166297	C	major	0.98337
Crk18_SpkWt_g	S20_580880025	20	580880025	0.0346463	0.253678	A	G	0.0110865	G	minor	0.0110865
Crk18_SpkWt_g	S20_603356555	20	603356555	-0.00303999	0.00459651	A	C	0.0277162	A	major	0.972284
Crk18_SpkWt_g	S21_66129792	21	66129792	-0.00389575	0.00254124	C	G	0.00886918	C	major	0.991131
Crk18_SpkWt_g	S21_86037764	21	86037764	0.0104967	0.233258	T	C	0.13082	T	major	0.86918
Crk18_SpkWt_g	S21_90650201	21	90650201	-0.000378583	0.000642553	T	C	0.378049	C	minor	0.378049
Crk18_SpkWt_g	S21_90762051	21	90762051	0.0486471	0.216918	T	C	0.00554324	T	major	0.994457
Crk18_SpkWt_g	S21_118538093	21	118538093	-0.022388	0.12657	G	A	0.0133038	A	minor	0.0133038
Crk18_SpkWt_g	S21_187878445	21	187878445	0.0472214	0.20962	T	A	0.00554324	T	major	0.994457
Crk18_SpkWt_g	S21_202424506	21	202424506	0.00893663	0.00773918	G	A	0.00554324	G	major	0.994457
Crk18_SpkWt_g	S21_411630228	21	411630228	-0.0621561	0.315341	C	T	0.00443459	C	major	0.995565
Crk18_SpkWt_g	S21_440793454	21	440793454	-0.112006	0.541374	C	T	0.0022173	C	major	0.997783
Crk18_TKW_g	S01_29528910	1	29528910	0.140804	0.222726	G	A	0.0369955	G	major	0.963004
Crk18_TKW_g	S01_425640986	1	425640986	-0.521322	0.464426	C	G	0.00560538	C	major	0.994395
Crk18_TKW_g	S01_440284589	1	440284589	0.569284	0.753236	G	C	0.00784753	G	major	0.992152
Crk18_TKW_g	S01_441127557	1	441127557	0.528159	0.417473	G	C	0.00448431	G	major	0.995516
Crk18_TKW_g	S01_448040019	1	448040019	0.252321	0.791091	G	A	0.0369955	G	major	0.963004
Crk18_TKW_g	S02_21200739	2	21200739	-0.200628	0.100407	C	T	0.00784753	C	major	0.992152
Crk18_TKW_g	S02_86294469	2	86294469	0.056023	0.215209	A	G	0.334081	G	minor	0.334081
Crk18_TKW_g	S02_110750907	2	110750907	-0.0690941	0.323848	C	T	0.328475	C	major	0.671525
Crk18_TKW_g	S02_120531680	2	120531680	-0.0321686	0.00995465	A	T	0.0672646	A	major	0.932735
Crk18_TKW_g	S02_132955695	2	132955695	-0.242055	0.272527	A	G	0.014574	A	major	0.985426
Crk18_TKW_g	S02_143430838	2	143430838	-0.496089	2.118	C	T	0.0639013	C	major	0.936099
Crk18_TKW_g	S02_163841443	2	163841443	0.32986	1.3764	A	G	0.0941704	G	minor	0.0941704
Crk18_TKW_g	S02_280450209	2	280450209	-0.0820521	0.0155606	G	A	0.00672646	A	minor	0.00672646
Crk18_TKW_g	S02_327466245	2	327466245	0.298833	0.273323	C	T	0.00896861	T	minor	0.00896861
Crk18_TKW_g	S02_403257803	2	403257803	0.281052	0.885965	T	G	0.0840807	T	major	0.915919
Crk18_TKW_g	S03_58073504	3	58073504	0.154121	1.48808	G	A	0.337444	G	major	0.662556
Crk18_TKW_g	S03_290939373	3	290939373	0.0439316	0.012557	G	A	0.0201794	G	major	0.979821
Crk18_TKW_g	S03_337625064	3	337625064	-0.112305	0.952487	T	G	0.433857	G	minor	0.433857
Crk18_TKW_g	S03_354805182	3	354805182	-0.288744	0.952684	C	A	0.0336323	A	minor	0.0336323
Crk18_TKW_g	S03_407190205	3	407190205	0.365681	1.8091	A	G	0.10426	G	minor	0.10426
Crk18_TKW_g	S03_431611782	3	431611782	-0.0655521	0.0132909	T	A	0.00896861	A	minor	0.00896861
Crk18_TKW_g	S03_477602723	3	477602723	-0.0407277	0.0109301	A	C	0.0213004	A	major	0.9787
Crk18_TKW_g	S04_5654320	4	5654320	-0.175811	2.45078	G	C	0.431614	C	minor	0.431614
Crk18_TKW_g	S04_31032972	4	31032972	0.184716	0.154129	G	A	0.014574	G	major	0.985426
Crk18_TKW_g	S04_35525008	4	35525008	0.33075	0.632707	C	A	0.0190583	C	major	0.980942
Crk18_TKW_g	S04_48117627	4	48117627	-0.104315	0.446806	A	G	0.159193	A	major	0.840807
Crk18_TKW_g	S04_99870528	4	99870528	-1.12765	1.93967	C	T	0.00448431	C	major	0.995516
Crk18_TKW_g	S04_103131373	4	103131373	0.400503	1.04336	T	A	0.0213004	T	major	0.9787
Crk18_TKW_g	S04_119394068	4	119394068	-0.241756	0.516519	A	C	0.0280269	A	major	0.971973
Crk18_TKW_g	S04_137847829	4	137847829	0.264493	0.441984	T	C	0.0213004	T	major	0.9787
Crk18_TKW_g	S04_199697392	4	199697392	-1.04716	1.76153	G	T	0.00560538	G	major	0.994395
Crk18_TKW_g	S04_220130053	4	220130053	0.848166	2.34948	G	A	0.0123318	G	major	0.987668
Crk18_TKW_g	S04_239757520	4	239757520	0.26307	0.845697	G	A	0.0930493	G	major	0.906951
Crk18_TKW_g	S04_261858888	4	261858888	-0.459151	3.00322	G	A	0.103139	A	minor	0.103139
Crk18_TKW_g	S05_57840749	5	57840749	0.155958	0.0927826	T	C	0.0123318	T	major	0.987668
Crk18_TKW_g	S05_366528709	5	366528709	0.160653	1.85829	A	G	0.456278	G	minor	0.456278
Crk18_TKW_g	S05_397289341	5	397289341	1.26349	1.19444	G	A	0.00224215	G	major	0.997758
Crk18_TKW_g	S06_27073124	6	27073124	-0.366805	0.506941	C	T	0.0123318	C	major	0.987668
Crk18_TKW_g	S06_30049280	6	30049280	-0.418777	2.22889	A	C	0.100897	A	major	0.899103
Crk18_TKW_g	S06_166357566	6	166357566	0.74331	0.928534	G	A	0.00560538	G	major	0.994395
Crk18_TKW_g	S06_347530512	6	347530512	0.51936	0.901115	G	A	0.0100897	G	major	0.98991
Crk18_TKW_g	S06_373070997	6	373070997	-0.0700117	0.0360215	G	A	0.0224215	A	minor	0.0224215
Crk18_TKW_g	S06_480699953	6	480699953	-0.859527	1.70548	A	T	0.00672646	A	major	0.993274
Crk18_TKW_g	S06_510179340	6	510179340	0.110822	0.883781	A	G	0.45852	G	minor	0.45852
Crk18_TKW_g	S06_518578819	6	518578819	0.113834	0.917936	C	G	0.422646	G	minor	0.422646
Crk18_TKW_g	S06_568793265	6	568793265	-0.182278	2.56593	G	A	0.420404	A	minor	0.420404
Crk18_TKW_g	S07_12079084	7	12079084	0.224048	0.956752	A	G	0.0639013	G	minor	0.0639013
Crk18_TKW_g	S07_91555077	7	91555077	-0.678513	2.09524	C	T	0.014574	C	major	0.985426
Crk18_TKW_g	S07_103055343	7	103055343	0.0343733	0.0116253	C	G	0.0683857	G	minor	0.0683857
Crk18_TKW_g	S07_156597465	7	156597465	-0.190741	0.0898765	C	T	0.00784753	C	major	0.992152
Crk18_TKW_g	S07_226848353	7	226848353	0.205812	0.432996	G	A	0.07287	G	major	0.92713
Crk18_TKW_g	S07_516499740	7	516499740	0.0469367	0.168675	A	G	0.440583	G	minor	0.440583
Crk18_TKW_g	S08_67484386	8	67484386	0.0387892	0.00703701	A	G	0.014574	G	minor	0.014574
Crk18_TKW_g	S08_121556108	8	121556108	0.694055	6.25298	C	T	0.0986547	T	minor	0.0986547
Crk18_TKW_g	S08_197291732	8	197291732	-0.422645	1.94595	C	T	0.073991	C	major	0.926009
Crk18_TKW_g	S08_324506204	8	324506204	-0.326109	1.30277	A	G	0.0908072	A	major	0.909193
Crk18_TKW_g	S08_425968180	8	425968180	0.166558	2.0085	C	G	0.375561	G	minor	0.375561
Crk18_TKW_g	S09_61869885	9	61869885	-0.148472	0.728638	G	C	0.112108	C	minor	0.112108
Crk18_TKW_g	S09_315677404	9	315677404	0.123062	0.185766	C	A	0.0896861	C	major	0.910314
Crk18_TKW_g	S09_385133100	9	385133100	0.104326	0.415688	G	A	0.137892	G	major	0.862108
Crk18_TKW_g	S09_415851589	9	415851589	-0.012493	0.00172071	C	T	0.0852018	C	major	0.914798
Crk18_TKW_g	S10_10944243	10	10944243	0.195581	0.178242	G	A	0.014574	G	major	0.985426
Crk18_TKW_g	S10_62112342	10	62112342	-0.150934	1.63037	T	C	0.365471	C	minor	0.365471
Crk18_TKW_g	S10_120456859	10	120456859	-0.411933	1.58127	G	A	0.059417	A	minor	0.059417
Crk18_TKW_g	S10_447491711	10	447491711	-0.256226	0.111338	A	G	0.00560538	A	major	0.994395
Crk18_TKW_g	S10_459839942	10	459839942	0.03452	0.0106718	G	T	0.0605381	T	minor	0.0605381
Crk18_TKW_g	S10_463199055	10	463199055	0.0850658	0.005699	A	C	0.00224215	C	minor	0.00224215
Crk18_TKW_g	S11_6019252	11	6019252	-0.0594073	0.261567	G	A	0.471973	A	minor	0.471973
Crk18_TKW_g	S11_52972239	11	52972239	-0.567052	2.49055	C	G	0.0257848	C	major	0.974215
Crk18_TKW_g	S11_59775443	11	59775443	-0.247627	1.14037	C	T	0.0616592	C	major	0.938341
Crk18_TKW_g	S11_161626009	11	161626009	-1.20219	2.27003	A	G	0.00560538	A	major	0.994395
Crk18_TKW_g	S11_191637589	11	191637589	0.394033	0.150148	T	C	0.00336323	T	major	0.996637
Crk18_TKW_g	S11_211702566	11	211702566	-0.552637	1.74563	C	A	0.0213004	A	minor	0.0213004
Crk18_TKW_g	S11_227848416	11	227848416	0.176186	0.0486062	G	A	0.00448431	G	major	0.995516
Crk18_TKW_g	S11_235603452	11	235603452	-0.109156	0.886224	G	A	0.492152	A	minor	0.492152
Crk18_TKW_g	S11_241092955	11	241092955	-0.182669	2.48987	T	A	0.411435	A	minor	0.411435
Crk18_TKW_g	S12_25712846	12	25712846	0.0397061	0.103554	C	T	0.283632	T	minor	0.283632
Crk18_TKW_g	S12_87898328	12	87898328	-0.384017	1.62284	A	G	0.0807175	A	major	0.919283
Crk18_TKW_g	S13_9159276	13	9159276	0.965506	0.881694	G	A	0.00336323	G	major	0.996637
Crk18_TKW_g	S13_9595560	13	9595560	-0.0373982	0.00214719	C	T	0.00448431	C	major	0.995516
Crk18_TKW_g	S13_17051098	13	17051098	-0.249438	1.84861	A	G	0.108744	A	major	0.891256
Crk18_TKW_g	S13_29748874	13	29748874	0.451678	1.0899	G	A	0.0190583	G	major	0.980942
Crk18_TKW_g	S13_51976779	13	51976779	-0.0547473	0.234836	T	A	0.492152	A	minor	0.492152
Crk18_TKW_g	S13_58962015	13	58962015	0.171021	0.197779	G	A	0.0213004	G	major	0.9787
Crk18_TKW_g	S13_134782913	13	134782913	-0.960547	2.12658	C	T	0.00784753	C	major	0.992152
Crk18_TKW_g	S13_135391210	13	135391210	-0.710587	1.88679	C	T	0.0123318	C	major	0.987668
Crk18_TKW_g	S13_209539816	13	209539816	-0.410052	1.1284	C	G	0.0213004	C	major	0.9787
Crk18_TKW_g	S13_222536639	13	222536639	0.823273	2.10263	G	A	0.0100897	G	major	0.98991
Crk18_TKW_g	S13_245158348	13	245158348	0.583626	2.02785	G	C	0.0190583	G	major	0.980942
Crk18_TKW_g	S13_248290754	13	248290754	0.0872009	0.303342	A	G	0.144619	G	minor	0.144619
Crk18_TKW_g	S13_252462690	13	252462690	-0.00856894	0.00392157	G	C	0.200673	C	minor	0.200673
Crk18_TKW_g	S13_265039502	13	265039502	0.166299	0.0679611	A	G	0.00784753	G	minor	0.00784753
Crk18_TKW_g	S13_273891126	13	273891126	0.367953	0.48337	G	C	0.0112108	G	major	0.988789
Crk18_TKW_g	S14_76804610	14	76804610	0.183202	1.94406	C	T	0.234305	T	minor	0.234305
Crk18_TKW_g	S14_159035766	14	159035766	-0.457328	0.641246	C	T	0.0100897	C	major	0.98991
Crk18_TKW_g	S14_224203729	14	224203729	-0.11939	0.0723242	A	G	0.0156951	A	major	0.984305
Crk18_TKW_g	S14_234445278	14	234445278	-0.0716872	0.384781	G	A	0.376682	A	minor	0.376682
Crk18_TKW_g	S14_326710436	14	326710436	-0.33852	2.27626	G	A	0.0627803	A	minor	0.0627803
Crk18_TKW_g	S14_496475519	14	496475519	0.475492	0.702099	C	A	0.00896861	C	major	0.991031
Crk18_TKW_g	S15_349866048	15	349866048	0.123653	0.207358	G	C	0.10426	G	major	0.89574
Crk18_TKW_g	S15_374356928	15	374356928	0.410484	0.778622	C	T	0.0134529	T	minor	0.0134529
Crk18_TKW_g	S15_387961489	15	387961489	-0.566467	0.489784	G	A	0.00448431	A	minor	0.00448431
Crk18_TKW_g	S15_412358042	15	412358042	0.217932	2.95901	T	G	0.28139	T	major	0.71861
Crk18_TKW_g	S15_566727557	15	566727557	-0.56875	1.01601	A	C	0.0100897	A	major	0.98991
Crk18_TKW_g	S15_582877307	15	582877307	0.0301569	0.0133859	T	G	0.0493274	T	major	0.950673
Crk18_TKW_g	S15_600918584	15	600918584	0.0533145	0.174088	C	T	0.252242	T	minor	0.252242
Crk18_TKW_g	S16_31792648	16	31792648	0.581156	1.94391	T	C	0.0190583	T	major	0.980942
Crk18_TKW_g	S16_229832414	16	229832414	-0.336688	1.11384	G	A	0.073991	A	minor	0.073991
Crk18_TKW_g	S16_242132329	16	242132329	0.0390709	0.108232	C	G	0.480942	G	minor	0.480942
Crk18_TKW_g	S16_263001852	16	263001852	0.35602	3.45037	G	A	0.0952915	G	major	0.904709
Crk18_TKW_g	S16_296781475	16	296781475	0.216543	0.554657	G	A	0.0986547	G	major	0.901345
Crk18_TKW_g	S16_336657077	16	336657077	0.153118	1.84659	T	A	0.411435	T	major	0.588565
Crk18_TKW_g	S16_336657091	16	336657091	-0.116836	0.830925	A	C	0.25	A	major	0.75
Crk18_TKW_g	S16_399342247	16	399342247	0.0846307	0.0309862	C	T	0.0134529	T	minor	0.0134529
Crk18_TKW_g	S17_108653775	17	108653775	0.376715	1.79093	T	C	0.0975336	T	major	0.902466
Crk18_TKW_g	S17_108653809	17	108653809	-0.326866	1.33814	C	T	0.0964126	C	major	0.903587
Crk18_TKW_g	S17_239233309	17	239233309	-0.426814	2.26186	C	T	0.103139	C	major	0.896861
Crk18_TKW_g	S17_286648169	17	286648169	0.621803	1.36882	T	C	0.0112108	T	major	0.988789
Crk18_TKW_g	S18_31933921	18	31933921	-0.131823	0.222603	C	T	0.0381166	C	major	0.961883
Crk18_TKW_g	S18_62374700	18	62374700	0.470787	2.47903	G	A	0.0347534	G	major	0.965247
Crk18_TKW_g	S18_75576716	18	75576716	0.524971	1.63187	T	C	0.0201794	T	major	0.979821
Crk18_TKW_g	S18_112460873	18	112460873	-0.449771	1.8395	G	A	0.0605381	A	minor	0.0605381
Crk18_TKW_g	S18_182594987	18	182594987	-0.467972	2.59077	G	T	0.0840807	G	major	0.915919
Crk18_TKW_g	S18_412960071	18	412960071	-0.413426	2.2054	A	G	0.0975336	A	major	0.902466
Crk18_TKW_g	S18_426508862	18	426508862	-0.903019	1.66053	G	T	0.00672646	G	major	0.993274
Crk18_TKW_g	S18_482517030	18	482517030	-0.717363	4.70465	G	A	0.0616592	A	minor	0.0616592
Crk18_TKW_g	S18_545444320	18	545444320	-0.440409	1.99356	G	A	0.0762332	A	minor	0.0762332
Crk18_TKW_g	S19_70012848	19	70012848	0.228129	0.512056	G	A	0.0683857	G	major	0.931614
Crk18_TKW_g	S19_124074654	19	124074654	0.110601	0.673261	G	A	0.221973	G	major	0.778027
Crk18_TKW_g	S19_543224680	19	543224680	-0.09491	0.0542153	A	C	0.0190583	A	major	0.980942
Crk18_TKW_g	S19_551502245	19	551502245	0.148778	0.020976	C	A	0.00336323	C	major	0.996637
Crk18_TKW_g	S19_634869001	19	634869001	0.0516565	0.187027	T	C	0.330717	T	major	0.669283
Crk18_TKW_g	S19_677800667	19	677800667	-0.536715	4.16366	T	A	0.0964126	A	minor	0.0964126
Crk18_TKW_g	S19_692361944	19	692361944	0.210694	0.650173	G	T	0.0930493	T	minor	0.0930493
Crk18_TKW_g	S19_736363601	19	736363601	-0.0286188	0.051249	C	G	0.340807	C	major	0.659193
Crk18_TKW_g	S20_35656076	20	35656076	-0.184969	1.69545	G	T	0.196188	G	major	0.803812
Crk18_TKW_g	S20_89189834	20	89189834	0.349134	0.295496	A	G	0.00784753	G	minor	0.00784753
Crk18_TKW_g	S20_148333930	20	148333930	-0.224912	0.639518	C	A	0.0908072	A	minor	0.0908072
Crk18_TKW_g	S20_158929692	20	158929692	0.383007	0.221733	A	G	0.00448431	G	minor	0.00448431
Crk18_TKW_g	S20_339143703	20	339143703	0.368093	1.89302	G	A	0.105381	G	major	0.894619
Crk18_TKW_g	S20_404723936	20	404723936	-0.475925	0.34802	A	T	0.00448431	A	major	0.995516
Crk18_TKW_g	S20_405356717	20	405356717	-0.152711	1.87284	T	A	0.460762	A	minor	0.460762
Crk18_TKW_g	S20_488953056	20	488953056	0.253431	0.342153	C	G	0.0168161	G	minor	0.0168161
Crk18_TKW_g	S20_580880025	20	580880025	-0.147838	0.0812678	A	G	0.0112108	A	major	0.988789
Crk18_TKW_g	S20_603356555	20	603356555	-0.483621	2.01856	A	C	0.0280269	A	major	0.971973
Crk18_TKW_g	S21_66129792	21	66129792	0.279153	0.229708	C	G	0.00896861	G	minor	0.00896861
Crk18_TKW_g	S21_86037764	21	86037764	0.208275	1.53906	T	C	0.127803	T	major	0.872197
Crk18_TKW_g	S21_90650201	21	90650201	0.0814081	0.506646	T	C	0.375561	T	major	0.624439
Crk18_TKW_g	S21_90762051	21	90762051	1.20219	2.27003	T	C	0.00560538	T	major	0.994395
Crk18_TKW_g	S21_118538093	21	118538093	0.271389	0.323417	G	A	0.0134529	G	major	0.986547
[truncated: 2,314 more rows]
